# Supplementary material for: Genome-wide CRISPR screen reveals PSMA6 to be an essential gene in pancreatic cancer cells
Source: PubMed Central journal article supplement (PMC6429770; doi:10.1186/s12885-019-5455-1), 2019-03-21

### 7-AAD vs Annexin V: Bortezomib

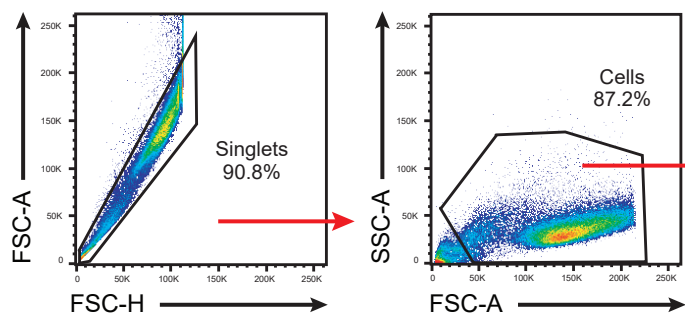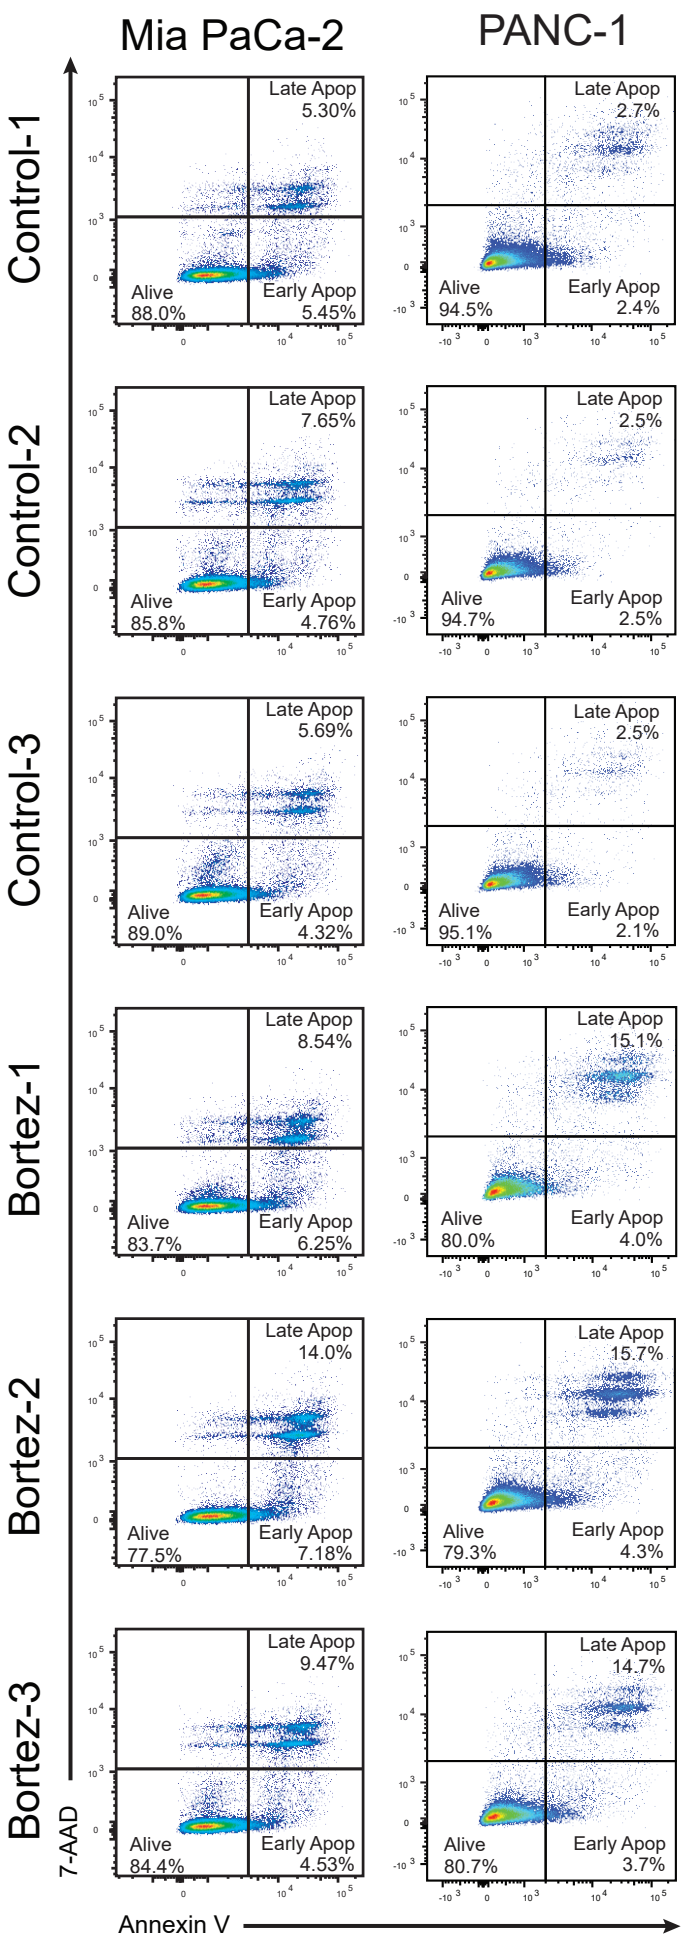

Supplement: 12885_2019_5455_MOESM9_ESM.pdf [file 12885_2019_5455_MOESM9_ESM.pdf]
