# Supplementary material for: Genome-wide CRISPR screen reveals PSMA6 to be an essential gene in pancreatic cancer cells
Source: BMC Cancer. 2019 Mar 21;19:253. doi: 10.1186/s12885-019-5455-1 (PMC6429770; doi:10.1186/s12885-019-5455-1)
Supplement: Supplementary file 3 — Ranked gene list results from the negative selection CRISPR screen. (XLSX 1554 kb) [file 12885_2019_5455_MOESM3_ESM.xlsx]

## Sheet: lowgempanc1.gene_summary
id	num	neg|score	neg|p-value	neg|fdr	neg|rank	neg|goodsgrna	pos|score	pos|p-value	pos|fdr	pos|rank	pos|goodsgrna
SRSF12	4	2.4671e-06	7.511e-06	0.126238	1	4	1	1	0.999997	19114	0
TAF1C	4	3.8796e-06	1.3209e-05	0.126238	2	3	0.98983	0.98988	0.999997	18812	0
OR52N5	4	1.1511e-05	4.9469e-05	0.268564	3	4	0.99999	0.99998	0.999997	19113	0
GGPS1	4	1.2931e-05	5.6203e-05	0.268564	4	4	0.99996	0.99995	0.999997	19111	0
TELO2	4	2.5632e-05	0.0001023	0.330858	5	4	0.99975	0.99974	0.999997	19099	0
MYOM3	4	2.6164e-05	0.00010386	0.330858	6	1	0.76826	0.76813	0.999997	14491	0
PSTK	4	3.7267e-05	0.00014064	0.347153	7	4	0.99996	0.99996	0.999997	19112	0
SCAP	4	3.947e-05	0.0001453	0.347153	8	3	0.98198	0.98202	0.999997	18621	0
MRPL41	4	6.5794e-05	0.00024475	0.428668	9	4	0.99993	0.99992	0.999997	19110	0
NFKBID	4	6.8834e-05	0.00025615	0.428668	10	3	0.98042	0.98042	0.999997	18584	0
CRNN	4	7.849e-05	0.00029448	0.428668	11	1	0.13322	0.21392	0.996358	4090	2
VMP1	4	8.0362e-05	0.00029914	0.428668	12	4	0.99992	0.9999	0.999997	19109	0
ILF3	4	8.7184e-05	0.00032556	0.428668	13	3	0.79825	0.79825	0.999997	15033	0
MTIF2	4	9.7592e-05	0.00036545	0.428668	14	3	0.98752	0.9876	0.999997	18762	0
SCO2	4	0.00011142	0.0004131	0.428668	15	4	0.99989	0.99987	0.999997	19108	0
USP17L11	4	0.00011608	0.00042864	0.428668	16	4	0.99988	0.99987	0.999997	19107	0
GOLGA6L9	4	0.00011765	0.00043641	0.428668	17	3	0.88859	0.88816	0.999997	16798	0
PSAT1	4	0.00011856	0.00044315	0.428668	18	4	0.99988	0.99987	0.999997	19106	0
HOOK3	4	0.00012431	0.00046542	0.428668	19	4	0.99988	0.99986	0.999997	19105	0
TSNARE1	4	0.00012969	0.00048666	0.428668	20	2	0.20508	0.27086	0.998999	5181	1
ALG13	4	0.00013081	0.00049132	0.428668	21	2	0.98049	0.98051	0.999997	18586	0
CYC1	4	0.0001311	0.00049339	0.428668	22	4	0.99987	0.99986	0.999997	19104	0
PLEKHM2	4	0.00014084	0.00052965	0.437426	23	4	0.99712	0.99715	0.999997	19027	0
LUC7L3	4	0.00014861	0.0005628	0.437426	24	4	0.99881	0.99886	0.999997	19070	0
LRRC14B	4	0.00015079	0.00057213	0.437426	25	2	0.52444	0.52449	0.999997	9939	1
LMTK3	4	0.00016099	0.00060891	0.444628	26	4	0.99984	0.99983	0.999997	19103	0
SMARCB1	4	0.00016535	0.00062807	0.444628	27	3	0.9536	0.95346	0.999997	18057	0
TSHZ2	4	0.00017975	0.00068091	0.44637	28	3	0.96612	0.96598	0.999997	18298	0
CAMK1G	4	0.00018314	0.00069334	0.44637	29	2	0.10202	0.16949	0.994071	3248	2
DNAJC9	4	0.00018571	0.00070059	0.44637	30	4	0.99981	0.99981	0.999997	19102	0
NHLRC2	4	0.0002067	0.00077933	0.460396	31	4	0.99632	0.99635	0.999997	19000	0
BDH2	4	0.00020768	0.00078243	0.460396	32	3	0.99444	0.99449	0.999997	18941	0
MEN1	4	0.00021041	0.00079487	0.460396	33	4	0.99979	0.99979	0.999997	19101	0
PSMA6	4	0.00023018	0.00087257	0.486987	34	3	0.92695	0.92677	0.999997	17512	0
MED31	4	0.00023545	0.00089173	0.486987	35	1	0.391	0.4065	0.999997	7697	1
CD3EAP	4	0.00024367	0.00092385	0.490512	36	4	0.99976	0.99976	0.999997	19100	0
FAM170A	4	0.00028777	0.0010963	0.566363	37	1	0.51402	0.51453	0.999997	9740	1
TRIM40	4	0.00032259	0.0012181	0.575754	38	3	0.39449	0.40933	0.999997	7753	1
MRPS2	4	0.00033499	0.001259	0.575754	39	4	0.99967	0.99967	0.999997	19098	0
ACTR2	4	0.00033802	0.0012709	0.575754	40	3	0.99479	0.99484	0.999997	18953	0
NDUFB4	4	0.00033901	0.0012735	0.575754	41	3	0.89034	0.88995	0.999997	16832	0
ATP5H	4	0.00034009	0.0012776	0.575754	42	3	0.87204	0.87165	0.999997	16480	0
PSMB1	4	0.00034488	0.0012953	0.575754	43	3	0.86581	0.8655	0.999997	16355	0
GEMIN7	4	0.00037151	0.0013989	0.60495	44	4	0.99963	0.99964	0.999997	19097	0
EFCAB9	4	0.00037916	0.0014242	0.60495	45	3	0.86513	0.86481	0.999997	16342	0
CCDC136	4	0.0003924	0.0014797	0.607242	46	2	0.50642	0.50722	0.999997	9599	1
MRPL4	4	0.00041746	0.0015677	0.607242	47	4	0.99958	0.9996	0.999997	19096	0
PPA2	4	0.00041937	0.0015781	0.607242	48	3	0.85773	0.85752	0.999997	16204	0
STOML2	4	0.00042951	0.0016092	0.607242	49	4	0.99957	0.99959	0.999997	19095	0
PHIP	4	0.00044102	0.0016501	0.607242	50	4	0.99956	0.99957	0.999997	19094	0
LYRM2	4	0.00044471	0.0016615	0.607242	51	2	0.10998	0.1808	0.994071	3474	1
POLR3K	4	0.00046304	0.0017366	0.607242	52	2	0.60669	0.6065	0.999997	11476	0
TTC4	4	0.00046446	0.0017433	0.607242	53	3	0.50017	0.50124	0.999997	9488	1
CPSF1	4	0.00047442	0.0017868	0.607242	54	4	0.99953	0.99954	0.999997	19093	0
USP22	4	0.00047956	0.0018081	0.607242	55	3	0.69032	0.69	0.999997	13042	0
TRAPPC4	4	0.00048357	0.0018205	0.607242	56	4	0.99952	0.99954	0.999997	19092	0
ADAT3	4	0.00049702	0.0018702	0.607242	57	1	0.80253	0.80249	0.999997	15124	0
RAD1	4	0.00050932	0.0019096	0.607242	58	4	0.99949	0.99951	0.999997	19091	0
MRPL51	4	0.00051186	0.0019163	0.607242	59	3	0.48348	0.4858	0.999997	9179	1
SPTBN2	4	0.00051225	0.0019168	0.607242	60	3	0.077123	0.13392	0.987051	2580	1
CDIPT	4	0.00054933	0.0020448	0.607242	61	3	0.99339	0.99342	0.999997	18910	0
OR10G9	4	0.00057645	0.0021458	0.607242	62	4	0.99942	0.99943	0.999997	19090	0
ACSM4	4	0.00057992	0.0021551	0.607242	63	2	0.79162	0.79166	0.999997	14912	0
ATP6V0C	4	0.00058603	0.0021733	0.607242	64	3	0.99201	0.99201	0.999997	18871	0
NDNL2	4	0.00058684	0.0021769	0.607242	65	4	0.99941	0.99943	0.999997	19089	0
NUDT19	4	0.00059063	0.0021903	0.607242	66	3	0.9709	0.9708	0.999997	18392	0
PRM1	4	0.0006052	0.0022427	0.607242	67	4	0.99939	0.99941	0.999997	19088	0
CPT1B	4	0.00061817	0.0022903	0.607242	68	3	0.9915	0.99149	0.999997	18855	0
SPDYE6	4	0.00062647	0.0023266	0.607242	69	4	0.99937	0.99939	0.999997	19087	0
TIMM10	4	0.00063547	0.0023592	0.607242	70	4	0.99704	0.99707	0.999997	19025	0
FOXD4L6	4	0.00064406	0.0023919	0.607242	71	4	0.99936	0.99938	0.999997	19086	0
SETD1B	4	0.00065394	0.002425	0.607242	72	2	0.68784	0.6875	0.999997	12989	0
SLC2A1	4	0.00065673	0.0024354	0.607242	73	4	0.99905	0.99911	0.999997	19073	0
ALG1	4	0.000659	0.0024473	0.607242	74	4	0.99934	0.99936	0.999997	19085	0
N6AMT1	4	0.00066396	0.0024654	0.607242	75	4	0.99934	0.99936	0.999997	19084	0
RQCD1	4	0.00067376	0.0025058	0.607242	76	4	0.99933	0.99935	0.999997	19083	0
WAS	4	0.00067978	0.0025281	0.607242	77	2	0.044471	0.086373	0.973615	1681	2
MARS2	4	0.00070085	0.002612	0.607242	78	4	0.9993	0.99932	0.999997	19082	0
C10orf2	4	0.00070496	0.0026275	0.607242	79	3	0.9848	0.98487	0.999997	18698	0
FAM103A1	4	0.00070624	0.0026322	0.607242	80	1	0.65059	0.65032	0.999997	12286	0
C8orf33	4	0.00071988	0.002684	0.607242	81	2	0.56774	0.56745	0.999997	10739	0
PRMT1	4	0.00072429	0.0026975	0.607242	82	3	0.89193	0.89151	0.999997	16869	0
CINP	4	0.00072552	0.0027001	0.607242	83	4	0.99927	0.9993	0.999997	19081	0
ASCC1	4	0.00072737	0.0027078	0.607242	84	4	0.99927	0.9993	0.999997	19080	0
KLHDC7A	4	0.00073435	0.0027291	0.607242	85	4	0.99927	0.99929	0.999997	19079	0
CPVL	4	0.00074207	0.0027601	0.607242	86	2	0.41166	0.42342	0.999997	8025	1
ANKRD28	4	0.00074585	0.0027762	0.607242	87	4	0.99925	0.99928	0.999997	19078	0
SNX10	4	0.00075854	0.0028233	0.607242	88	2	0.66768	0.66738	0.999997	12599	0
KLK13	4	0.00075936	0.0028275	0.607242	89	2	0.9711	0.971	0.999997	18397	0
TCP1	4	0.00076975	0.0028606	0.607536	90	4	0.99923	0.99926	0.999997	19077	0
B4GALT2	4	0.00081084	0.0029886	0.623416	91	1	0.10805	0.1781	0.994071	3407	2
UQCRC1	4	0.00081964	0.0030274	0.623416	92	3	0.95951	0.95933	0.999997	18170	0
PTPN23	4	0.00082993	0.0030642	0.623416	93	3	0.70087	0.7006	0.999997	13239	0
PSMG1	4	0.00084226	0.003115	0.623416	94	3	0.65716	0.65683	0.999997	12404	0
CDS2	4	0.00085062	0.0031424	0.623416	95	2	0.9936	0.99362	0.999997	18913	0
RUFY4	4	0.00086313	0.0031854	0.623416	96	3	0.99481	0.99486	0.999997	18955	0
MCAT	4	0.0008706	0.0032098	0.623416	97	4	0.99913	0.99918	0.999997	19076	0
ACTR10	4	0.00087097	0.0032103	0.623416	98	2	0.97003	0.9699	0.999997	18376	0
OSBPL8	4	0.00088313	0.0032538	0.623416	99	4	0.99912	0.99917	0.999997	19075	0
CSNK1A1	4	0.00088717	0.0032616	0.623416	100	3	0.90069	0.90028	0.999997	17044	0
ATP6V1D	4	0.00090205	0.0033077	0.625968	101	4	0.9991	0.99915	0.999997	19074	0
SPATA31A5	4	0.00091542	0.0033501	0.627791	102	2	0.27781	0.32063	0.999997	6103	1
SFXN3	4	0.00092767	0.0033854	0.628232	103	3	0.61168	0.61147	0.999997	11578	0
OPA1	4	0.00096772	0.0035408	0.650752	104	2	0.38266	0.39977	0.999997	7567	1
WDR3	4	0.0009954	0.0036345	0.65893	105	3	0.98154	0.98156	0.999997	18606	0
SLC30A9	4	0.001	0.0036542	0.65893	106	2	0.8727	0.87231	0.999997	16490	0
COLCA1	4	0.001016	0.0037102	0.659562	107	2	0.89415	0.8937	0.999997	16893	0
EXOC3L4	4	0.00102	0.0037267	0.659562	108	1	0.28845	0.32838	0.999997	6253	1
DHX35	4	0.0010566	0.0038671	0.676523	109	4	0.99565	0.99567	0.999997	18982	0
STIL	4	0.0010648	0.0038982	0.676523	110	3	0.86283	0.86257	0.999997	16292	0
MUS81	4	0.0010723	0.0039287	0.676523	111	1	0.85807	0.85784	0.999997	16213	0
COMMD3	4	0.0010825	0.0039707	0.677643	112	4	0.99892	0.99898	0.999997	19072	0
MRPL34	4	0.0011246	0.0041121	0.687052	113	3	0.28951	0.32914	0.999997	6266	1
KRTAP3-2	4	0.0011354	0.004151	0.687052	114	3	0.97984	0.97985	0.999997	18569	0
DUSP4	4	0.0011369	0.0041567	0.687052	115	4	0.99886	0.99891	0.999997	19071	0
C19orf26	4	0.0011421	0.0041696	0.687052	116	2	0.60729	0.6071	0.999997	11486	0
WFDC10A	4	0.0011769	0.0043017	0.702759	117	2	0.1612	0.24236	0.997004	4634	1
IMP3	4	0.0011994	0.0043939	0.707069	118	3	0.80781	0.80776	0.999997	15242	0
CUL3	4	0.0012116	0.0044385	0.707069	119	4	0.99879	0.99884	0.999997	19069	0
LEMD2	4	0.0012119	0.0044395	0.707069	120	4	0.99879	0.99884	0.999997	19068	0
CFAP70	4	0.0012291	0.0045037	0.707069	121	1	0.65131	0.65101	0.999997	12296	0
PRSS8	4	0.0012318	0.004513	0.707069	122	4	0.99877	0.99882	0.999997	19067	0
HAP1	4	0.001244	0.0045612	0.708806	123	3	0.26111	0.30891	0.999997	5896	1
SLC6A9	4	0.0012662	0.0046358	0.70998	124	4	0.99873	0.99878	0.999997	19066	0
JUNB	4	0.0012686	0.0046431	0.70998	125	4	0.99873	0.99878	0.999997	19065	0
CDC42	4	0.0012814	0.0046824	0.710317	126	1	0.91554	0.91519	0.999997	17321	0
RBX1	4	0.0013054	0.0047824	0.719771	127	3	0.97405	0.974	0.999997	18463	0
KANK2	4	0.0013337	0.0048751	0.727994	128	2	0.8228	0.82262	0.999997	15528	0
UNC79	4	0.0013589	0.0049678	0.733976	129	4	0.99864	0.99869	0.999997	19064	0
DNAJB1	4	0.001386	0.0050559	0.733976	130	2	0.7443	0.74403	0.999997	14036	0
NAA38	4	0.0013888	0.0050673	0.733976	131	4	0.99861	0.99866	0.999997	19063	0
FAXC	4	0.0013911	0.0050751	0.733976	132	3	0.47433	0.47746	0.999997	9031	1
NTNG1	4	0.0014027	0.0051072	0.733976	133	4	0.9986	0.99865	0.999997	19062	0
LONP1	4	0.0014289	0.0052004	0.734878	134	3	0.36509	0.38582	0.999997	7304	1
ZNF131	4	0.0014372	0.0052294	0.734878	135	4	0.99856	0.99862	0.999997	19061	0
ERCC3	4	0.0014382	0.0052331	0.734878	136	2	0.89452	0.89408	0.999997	16902	0
RPS10	4	0.0014469	0.0052673	0.734878	137	4	0.99855	0.99861	0.999997	19060	0
FDXR	4	0.0014803	0.0053714	0.741654	138	3	0.8496	0.84935	0.999997	16059	0
ATP6V1C1	4	0.0014905	0.0054128	0.741654	139	2	0.32385	0.35427	0.999997	6719	1
PUS3	4	0.0015189	0.0055003	0.741654	140	3	0.83384	0.83353	0.999997	15736	0
UBTFL1	4	0.0015233	0.0055154	0.741654	141	4	0.99848	0.99853	0.999997	19059	0
LOC388436	4	0.0015428	0.0055874	0.741654	142	3	0.99043	0.99045	0.999997	18820	0
ABCA6	4	0.001546	0.0055951	0.741654	143	4	0.99845	0.99851	0.999997	19058	0
PUM1	4	0.0015486	0.0056014	0.741654	144	2	0.65601	0.65567	0.999997	12384	0
LSG1	4	0.0015585	0.0056283	0.741654	145	2	0.90307	0.90262	0.999997	17091	0
DOHH	4	0.0015913	0.0057635	0.741654	146	3	0.36977	0.38953	0.999997	7372	1
CEACAM20	4	0.001595	0.0057806	0.741654	147	2	0.57467	0.57449	0.999997	10879	0
ASPSCR1	4	0.0016034	0.0058153	0.741654	148	2	0.28419	0.32527	0.999997	6189	1
GAPDH	4	0.0016288	0.0059194	0.741654	149	4	0.99837	0.99844	0.999997	19057	0
AP1G2	4	0.0016308	0.0059256	0.741654	150	3	0.94265	0.94242	0.999997	17842	0
MRPS16	4	0.0016336	0.0059381	0.741654	151	3	0.63493	0.63472	0.999997	12002	0
CARD9	4	0.0016358	0.0059438	0.741654	152	3	0.46287	0.46717	0.999997	8839	1
ZNF501	4	0.001639	0.0059619	0.741654	153	4	0.99836	0.99843	0.999997	19056	0
NUAK1	4	0.0016664	0.0060494	0.741654	154	4	0.99833	0.9984	0.999997	19055	0
MIPEP	4	0.0016667	0.0060499	0.741654	155	3	0.26921	0.31453	0.999997	5996	1
ODF3L1	4	0.0016682	0.0060531	0.741654	156	4	0.99833	0.99839	0.999997	19054	0
OR6K3	4	0.0016996	0.0061541	0.749227	157	2	0.69352	0.69317	0.999997	13108	0
CNTNAP3B	4	0.0017365	0.0062753	0.756219	158	2	0.88747	0.88702	0.999997	16774	0
MCM5	4	0.0017518	0.0063234	0.756219	159	2	0.37952	0.39726	0.999997	7517	1
DPH3	4	0.0017536	0.0063302	0.756219	160	4	0.99825	0.99829	0.999997	19053	0
PHLDB1	4	0.0017725	0.0063954	0.759271	161	4	0.99823	0.99827	0.999997	19052	0
RFC2	4	0.0017996	0.0064809	0.760319	162	2	0.9933	0.99331	0.999997	18907	0
TARS	4	0.0018041	0.0064965	0.760319	163	3	0.63041	0.63022	0.999997	11925	0
MIS18A	4	0.0018209	0.0065545	0.760319	164	3	0.2781	0.32084	0.999997	6109	1
STRIP1	4	0.0018558	0.0066721	0.760319	165	2	0.085569	0.14595	0.988199	2812	1
PTPMT1	4	0.0018563	0.0066731	0.760319	166	1	0.081452	0.14013	0.988199	2710	1
MTMR3	4	0.001866	0.0067078	0.760319	167	4	0.99813	0.99816	0.999997	19051	0
DPP3	4	0.0018722	0.0067353	0.760319	168	3	0.98852	0.9886	0.999997	18784	0
EPB41	4	0.0018767	0.0067485	0.760319	169	3	0.45255	0.4581	0.999997	8661	1
HMGA1	4	0.0019086	0.0068663	0.760319	170	2	0.83641	0.83608	0.999997	15791	0
PSMG3	4	0.0019274	0.0069248	0.760319	171	4	0.99807	0.9981	0.999997	19050	0
YARS	4	0.0019337	0.0069445	0.760319	172	3	0.87999	0.87955	0.999997	16627	0
SAFB	4	0.0019346	0.0069487	0.760319	173	3	0.71798	0.71791	0.999997	13557	0
MRPS18A	4	0.0019431	0.0069704	0.760319	174	3	0.85583	0.85559	0.999997	16174	0
FA2H	4	0.0019609	0.0070284	0.760319	175	2	0.80632	0.8063	0.999997	15210	0
ARF1	4	0.001979	0.0070979	0.760319	176	3	0.98745	0.98753	0.999997	18761	0
CELA1	4	0.0020131	0.0072387	0.760319	177	1	0.038139	0.076948	0.97338	1511	2
CDK2	4	0.002019	0.0072662	0.760319	178	4	0.99798	0.99801	0.999997	19049	0
TKFC	4	0.0020307	0.0073066	0.760319	179	3	0.94001	0.93984	0.999997	17799	0
SACS	4	0.0020557	0.0073952	0.760319	180	3	0.97718	0.97705	0.999997	18518	0
PGK1	4	0.0020654	0.0074257	0.760319	181	3	0.5254	0.5254	0.999997	9952	1
THOC3	4	0.0020867	0.0074983	0.760319	182	3	0.90141	0.90102	0.999997	17056	0
GAL3ST3	4	0.0021004	0.0075563	0.760319	183	2	0.56604	0.56574	0.999997	10713	0
NAPG	4	0.0021169	0.00762	0.760319	184	4	0.99788	0.99793	0.999997	19048	0
UROD	4	0.0021176	0.007621	0.760319	185	2	0.31053	0.34438	0.999997	6543	1
EXOSC3	4	0.0021304	0.0076666	0.760319	186	4	0.99787	0.99791	0.999997	19047	0
RPL19	4	0.0021674	0.0078054	0.760319	187	4	0.99783	0.99787	0.999997	19046	0
UBR4	4	0.0021697	0.0078158	0.760319	188	3	0.99186	0.99187	0.999997	18865	0
FZD7	4	0.0021698	0.0078163	0.760319	189	2	0.074213	0.12967	0.987051	2505	1
PROX1	4	0.0021732	0.0078293	0.760319	190	4	0.99783	0.99786	0.999997	19045	0
LTB4R	4	0.0021736	0.0078298	0.760319	191	3	0.98287	0.98293	0.999997	18637	0
ATP6V1B2	4	0.0022125	0.0079836	0.760319	192	4	0.99779	0.99782	0.999997	19044	0
HIST1H2AG	4	0.0022164	0.0079997	0.760319	193	2	0.62258	0.6224	0.999997	11776	0
SGTA	4	0.0022179	0.0080064	0.760319	194	3	0.93352	0.93341	0.999997	17626	0
TNFRSF19	4	0.0022221	0.0080178	0.760319	195	1	0.24433	0.29735	0.999997	5661	1
LCN15	4	0.0022282	0.0080411	0.760319	196	2	0.84536	0.84505	0.999997	15971	0
KHK	4	0.0022377	0.0080758	0.760319	197	4	0.99776	0.99779	0.999997	19043	0
GALNT9	4	0.0022578	0.0081416	0.760319	198	2	0.362	0.38339	0.999997	7262	1
LAS1L	4	0.0022685	0.0081737	0.760319	199	4	0.99773	0.99776	0.999997	19042	0
CLC	4	0.0022743	0.0081944	0.760319	200	3	0.040677	0.080684	0.973615	1581	1
LTV1	4	0.0022772	0.0082043	0.760319	201	3	0.25961	0.30785	0.999997	5873	1
OMD	4	0.0023024	0.0082939	0.760319	202	4	0.9977	0.99773	0.999997	19041	0
PKD1	4	0.0023266	0.0083695	0.760319	203	1	0.72514	0.72501	0.999997	13683	0
RTN4RL1	4	0.0023325	0.008396	0.760319	204	2	0.56092	0.56062	0.999997	10621	0
TTI1	4	0.0023788	0.0085659	0.760319	205	2	0.49288	0.49447	0.999997	9358	1
SRSF7	4	0.0024081	0.0086606	0.760319	206	4	0.99759	0.99761	0.999997	19040	0
NSUN2	4	0.0024264	0.008727	0.760319	207	4	0.99757	0.9976	0.999997	19039	0
ERBB2	4	0.002431	0.0087425	0.760319	208	1	0.44777	0.45402	0.999997	8595	1
KLK6	4	0.0024515	0.0088124	0.760319	209	3	0.9873	0.98738	0.999997	18759	0
FGFBP3	4	0.0024667	0.0088606	0.760319	210	4	0.99753	0.99756	0.999997	19038	0
LSM5	4	0.0024789	0.0089	0.760319	211	4	0.99752	0.99755	0.999997	19037	0
KIAA1217	4	0.0024833	0.0089129	0.760319	212	2	0.031397	0.067008	0.964407	1320	2
PEX19	4	0.0024855	0.0089196	0.760319	213	2	0.50525	0.50608	0.999997	9576	1
KLHL26	4	0.0024917	0.0089383	0.760319	214	3	0.64919	0.64895	0.999997	12256	0
DDX41	4	0.002498	0.0089585	0.760319	215	3	0.94326	0.943	0.999997	17855	0
DCPS	4	0.0025015	0.0089727	0.760319	216	3	0.79437	0.79439	0.999997	14954	0
ADGRF5	4	0.0025122	0.009003	0.760319	217	4	0.99749	0.99751	0.999997	19036	0
UPP1	4	0.0025167	0.0090124	0.760319	218	2	0.61335	0.61313	0.999997	11612	0
SYNPO	4	0.0025251	0.009044	0.760319	219	4	0.99747	0.9975	0.999997	19035	0
MCPH1	4	0.0025355	0.0090807	0.760319	220	2	0.056606	0.10411	0.979641	2031	1
ICAM3	4	0.0025601	0.0091553	0.760319	221	4	0.99744	0.99746	0.999997	19034	0
DNLZ	4	0.0025669	0.0091885	0.760319	222	4	0.9962	0.99622	0.999997	18996	0
PRR27	4	0.0025733	0.0092051	0.760319	223	3	0.92408	0.92382	0.999997	17458	0
EML3	4	0.0025877	0.0092558	0.760319	224	2	0.45773	0.46264	0.999997	8744	1
ZCCHC13	4	0.002588	0.0092558	0.760319	225	4	0.99607	0.99609	0.999997	18992	0
C2orf44	4	0.0025936	0.0092745	0.760319	226	3	0.11768	0.19184	0.995164	3672	1
UBE2G2	4	0.0026026	0.0093066	0.760319	227	3	0.44168	0.4487	0.999997	8490	1
IMP4	4	0.0026048	0.0093144	0.760319	228	3	0.99088	0.99089	0.999997	18834	0
ILF2	4	0.002606	0.0093159	0.760319	229	3	0.34582	0.37091	0.999997	7018	1
ZPR1	4	0.0026093	0.0093252	0.760319	230	3	0.92636	0.92615	0.999997	17501	0
C3orf22	4	0.0026183	0.0093506	0.760319	231	4	0.99738	0.99741	0.999997	19033	0
SCML1	4	0.0026285	0.0093884	0.760319	232	3	0.40385	0.41693	0.999997	7905	1
RPA2	4	0.0026399	0.0094273	0.760319	233	2	0.96224	0.96209	0.999997	18225	0
CNPPD1	4	0.0026432	0.0094402	0.760319	234	2	0.78893	0.7889	0.999997	14865	0
DAND5	4	0.0026496	0.009462	0.760319	235	2	0.71961	0.71954	0.999997	13586	0
EGR2	4	0.0026528	0.0094765	0.760319	236	4	0.99638	0.99641	0.999997	19004	0
VAMP3	4	0.0026689	0.0095273	0.760319	237	3	0.98214	0.98218	0.999997	18626	0
ALG11	4	0.0026695	0.0095298	0.760319	238	3	0.65978	0.65951	0.999997	12454	0
MSX2	4	0.0026745	0.0095485	0.760319	239	4	0.99733	0.99736	0.999997	19032	0
RASSF8	4	0.0026818	0.0095734	0.760319	240	4	0.99581	0.99582	0.999997	18989	0
GOLIM4	4	0.0026922	0.0096132	0.760319	241	1	0.356	0.37877	0.999997	7167	1
INSL4	4	0.0026982	0.009636	0.760319	242	3	0.42756	0.43668	0.999997	8274	1
MAPRE1	4	0.0027074	0.0096661	0.760319	243	4	0.99637	0.99641	0.999997	19003	0
NELFB	4	0.0027347	0.0097671	0.764619	244	4	0.99727	0.99729	0.999997	19031	0
TADA2A	4	0.0027444	0.0098008	0.764619	245	2	0.75832	0.75814	0.999997	14303	0
ELK1	4	0.0027687	0.0098914	0.768554	246	4	0.99723	0.99724	0.999997	19030	0
CTU2	4	0.0027915	0.0099779	0.772137	247	4	0.99721	0.99723	0.999997	19029	0
SMC2	4	0.0028244	0.010088	0.774043	248	3	0.99108	0.99108	0.999997	18840	0
SPINT1	4	0.0028401	0.010136	0.774043	249	4	0.99716	0.99718	0.999997	19028	0
OR2A2	4	0.0028488	0.010167	0.774043	250	2	0.88419	0.88373	0.999997	16703	0
MED4	4	0.0028817	0.010275	0.774043	251	3	0.78655	0.78654	0.999997	14819	0
ABT1	4	0.002888	0.010301	0.774043	252	4	0.99711	0.99714	0.999997	19026	0
C3orf17	4	0.0028961	0.010329	0.774043	253	3	0.84397	0.84367	0.999997	15945	0
C8orf4	4	0.002901	0.010348	0.774043	254	2	0.6677	0.6674	0.999997	12600	0
MUL1	4	0.0029356	0.010467	0.774043	255	2	0.99148	0.99148	0.999997	18854	0
ZNF570	4	0.002939	0.010477	0.774043	256	2	0.36729	0.38756	0.999997	7335	1
MTRR	4	0.0029533	0.010529	0.774043	257	1	0.01806	0.045765	0.932577	938	1
ADGRE3	4	0.0029677	0.010581	0.774043	258	4	0.99703	0.99706	0.999997	19024	0
RTTN	4	0.0029762	0.010606	0.774043	259	2	0.88574	0.88531	0.999997	16728	0
ELP5	4	0.0030055	0.010716	0.774043	260	2	0.91701	0.9167	0.999997	17347	0
BANF1	4	0.003022	0.010765	0.774043	261	3	0.85036	0.85012	0.999997	16071	0
SCAF1	4	0.0030307	0.010794	0.774043	262	3	0.93884	0.93867	0.999997	17777	0
IGF2R	4	0.0030361	0.01081	0.774043	263	4	0.99696	0.99699	0.999997	19023	0
TDGF1	4	0.0030577	0.010894	0.774043	264	1	0.066423	0.11843	0.984455	2297	2
PTCD3	4	0.0031099	0.011055	0.774043	265	2	0.64273	0.64246	0.999997	12150	0
ROMO1	4	0.0031172	0.011085	0.774043	266	3	0.94069	0.94052	0.999997	17813	0
SDAD1	4	0.0031299	0.011131	0.774043	267	4	0.99687	0.9969	0.999997	19022	0
RNF123	4	0.0031383	0.011158	0.774043	268	4	0.99686	0.99689	0.999997	19021	0
CNTLN	4	0.00314	0.011166	0.774043	269	3	0.93957	0.9394	0.999997	17789	0
RAC2	4	0.0031487	0.011198	0.774043	270	4	0.99685	0.99688	0.999997	19020	0
FBXO6	4	0.0031522	0.01121	0.774043	271	4	0.99685	0.99688	0.999997	19019	0
MTG1	4	0.0031527	0.011213	0.774043	272	3	0.61843	0.61824	0.999997	11694	0
SCARA3	4	0.0031585	0.011234	0.774043	273	2	0.16623	0.24555	0.997004	4702	1
ZNF155	4	0.0031621	0.011249	0.774043	274	2	0.60042	0.60019	0.999997	11347	0
UNG	4	0.0031654	0.011263	0.774043	275	4	0.99683	0.99686	0.999997	19018	0
CSH1	4	0.0031725	0.011287	0.774043	276	4	0.9965	0.99652	0.999997	19008	0
RPS24	4	0.0031846	0.01133	0.774043	277	3	0.84108	0.84074	0.999997	15892	0
TFB2M	4	0.0031898	0.011349	0.774043	278	3	0.93564	0.93555	0.999997	17713	0
UQCC1	4	0.003197	0.011374	0.774043	279	2	0.13341	0.21417	0.996358	4095	2
TMPRSS7	4	0.0032202	0.011459	0.774043	280	4	0.99678	0.99681	0.999997	19017	0
CARNS1	4	0.0032231	0.011471	0.774043	281	4	0.99678	0.99681	0.999997	19016	0
TOP2A	4	0.0032358	0.011519	0.774043	282	4	0.99676	0.9968	0.999997	19015	0
ZNF655	4	0.00325	0.011569	0.774043	283	4	0.99675	0.99678	0.999997	19014	0
DPYSL4	4	0.0032665	0.011631	0.774043	284	1	0.87785	0.87738	0.999997	16592	0
B3GNT9	4	0.0032676	0.011634	0.774043	285	3	0.37607	0.39449	0.999997	7464	1
EEFSEC	4	0.0032901	0.011712	0.774043	286	4	0.99671	0.99674	0.999997	19013	0
RPL7	4	0.0033016	0.01175	0.774043	287	4	0.9967	0.99673	0.999997	19012	0
ANKRD35	4	0.0033175	0.011801	0.774043	288	3	0.98336	0.98343	0.999997	18649	0
TRIM10	4	0.0033187	0.011803	0.774043	289	1	0.67024	0.66996	0.999997	12644	0
ATXN1	4	0.0033422	0.011891	0.774043	290	3	0.80751	0.80748	0.999997	15237	0
SOBP	4	0.0033533	0.01192	0.774043	291	2	0.65052	0.65026	0.999997	12285	0
GPR89A	4	0.0033709	0.01199	0.774043	292	2	0.090355	0.15287	0.988199	2949	1
ZCRB1	4	0.0033713	0.011991	0.774043	293	3	0.87379	0.87341	0.999997	16514	0
CCL14	4	0.0033785	0.012009	0.774043	294	2	0.026191	0.059169	0.95307	1186	1
CT45A3	4	0.0033834	0.012027	0.774043	295	3	0.98162	0.98165	0.999997	18608	0
THAP11	4	0.0034037	0.012096	0.774043	296	4	0.9966	0.99663	0.999997	19011	0
ALDOA	4	0.0034038	0.012096	0.774043	297	3	0.97958	0.97959	0.999997	18563	0
SAP130	4	0.003411	0.012118	0.774043	298	3	0.95476	0.95458	0.999997	18083	0
ETV7	4	0.0034155	0.012129	0.774043	299	3	0.74689	0.74671	0.999997	14085	0
TMEM200A	4	0.0034231	0.012149	0.774043	300	3	0.94841	0.94821	0.999997	17946	0
ZP3	4	0.0034459	0.012231	0.776701	301	4	0.99655	0.99658	0.999997	19010	0
NHS	4	0.0034646	0.012304	0.778502	302	4	0.99654	0.99656	0.999997	19009	0
CD46	4	0.0034753	0.012341	0.778502	303	2	0.797	0.79703	0.999997	15007	0
CDKN1A	4	0.0035048	0.012444	0.781544	304	3	0.99502	0.99506	0.999997	18960	0
GOLGA6L4	4	0.0035242	0.012515	0.781544	305	3	0.98582	0.9859	0.999997	18722	0
GATAD2A	4	0.0035275	0.012529	0.781544	306	1	0.73237	0.7322	0.999997	13810	0
PCNT	4	0.0035389	0.012566	0.781544	307	2	0.4463	0.45273	0.999997	8571	1
TBCB	4	0.0035796	0.012703	0.781544	308	2	0.42849	0.43749	0.999997	8292	1
PRMT5	4	0.0035803	0.012705	0.781544	309	4	0.99642	0.99645	0.999997	19007	0
ZBTB7A	4	0.0035888	0.012743	0.781544	310	4	0.99641	0.99644	0.999997	19006	0
CRTC3	4	0.0036165	0.012831	0.781544	311	4	0.99638	0.99642	0.999997	19005	0
TAMM41	4	0.0036318	0.012883	0.781544	312	3	0.51381	0.51433	0.999997	9734	1
COQ3	4	0.0036373	0.012907	0.781544	313	3	0.95422	0.95406	0.999997	18067	0
POLR2B	4	0.0036611	0.012979	0.781544	314	3	0.69937	0.69907	0.999997	13206	0
CDK4	4	0.0036653	0.012992	0.781544	315	3	0.98954	0.98958	0.999997	18805	0
PAICS	4	0.0036691	0.013009	0.781544	316	3	0.97211	0.97203	0.999997	18412	0
SNX8	4	0.0036716	0.013016	0.781544	317	4	0.99633	0.99636	0.999997	19002	0
PSMG2	4	0.0036755	0.013029	0.781544	318	4	0.99632	0.99636	0.999997	19001	0
C20orf196	4	0.003684	0.013058	0.781544	319	1	0.55991	0.5596	0.999997	10605	0
MYO7B	4	0.0036911	0.013084	0.781544	320	4	0.99631	0.99634	0.999997	18999	0
ASIC3	4	0.0037362	0.01324	0.786319	321	3	0.43625	0.44401	0.999997	8408	1
PAGE2B	4	0.0037431	0.01327	0.786319	322	3	0.89443	0.89399	0.999997	16900	0
RFWD2	4	0.0037582	0.013316	0.786319	323	4	0.99624	0.99627	0.999997	18998	0
HACD2	4	0.0037616	0.013329	0.786319	324	3	0.82304	0.82287	0.999997	15533	0
BACE1	4	0.0037884	0.013415	0.787038	325	2	0.94405	0.94381	0.999997	17866	0
MCEE	4	0.0037916	0.013427	0.787038	326	4	0.99621	0.99623	0.999997	18997	0
LOC100652758	4	0.0038036	0.013465	0.787038	327	4	0.9962	0.99621	0.999997	18995	0
CSNK1D	4	0.0038576	0.013648	0.792899	328	4	0.99614	0.99616	0.999997	18994	0
MARCKSL1	4	0.0038667	0.013687	0.792899	329	2	0.98595	0.98604	0.999997	18727	0
RSL24D1	4	0.0038744	0.013709	0.792899	330	2	0.59113	0.59088	0.999997	11182	0
KRTAP13-1	4	0.0038927	0.01377	0.792899	331	1	0.79376	0.7938	0.999997	14943	0
DNAJC11	4	0.0038937	0.013772	0.792899	332	3	0.17465	0.25104	0.997899	4808	1
TMEM11	4	0.0039228	0.013871	0.794623	333	4	0.99608	0.9961	0.999997	18993	0
NR1H4	4	0.0039449	0.013949	0.794623	334	1	0.94868	0.94848	0.999997	17955	0
TNRC6C	4	0.0039635	0.014013	0.794623	335	2	0.05015	0.094636	0.974449	1854	2
SMIM20	4	0.0039869	0.014084	0.794623	336	3	0.58756	0.58734	0.999997	11118	0
METAP2	4	0.0039971	0.01412	0.794623	337	2	0.7634	0.76325	0.999997	14394	0
ALG10B	4	0.004017	0.014192	0.794623	338	3	0.92773	0.92754	0.999997	17532	0
NELFA	4	0.0040438	0.014277	0.794623	339	3	0.94184	0.94164	0.999997	17829	0
RHOT2	4	0.004049	0.014293	0.794623	340	4	0.99595	0.99596	0.999997	18991	0
RDH13	4	0.0040535	0.014315	0.794623	341	2	0.1996	0.26729	0.997942	5117	1
ERCC6	4	0.0040543	0.014317	0.794623	342	4	0.99546	0.99547	0.999997	18972	0
ST6GALNAC4	4	0.004093	0.014441	0.794623	343	2	0.48767	0.4896	0.999997	9258	1
GNL3	4	0.004097	0.01445	0.794623	344	2	0.67666	0.67637	0.999997	12774	0
HYPK	4	0.0041049	0.014475	0.794623	345	3	0.86858	0.86825	0.999997	16413	0
RAB3A	4	0.0041247	0.014533	0.794623	346	3	0.94752	0.9473	0.999997	17932	0
AP2A1	4	0.0041536	0.014627	0.794623	347	1	0.00079632	0.0029155	0.769456	68	2
HIST1H4J	4	0.0041567	0.014637	0.794623	348	4	0.99584	0.99585	0.999997	18990	0
GRIK5	4	0.0041586	0.014644	0.794623	349	3	0.97447	0.97443	0.999997	18471	0
NSA2	4	0.004183	0.014729	0.794623	350	3	0.85097	0.85073	0.999997	16081	0
C1orf109	4	0.0041861	0.014739	0.794623	351	3	0.40675	0.41936	0.999997	7952	1
MAP3K12	4	0.0041925	0.014762	0.794623	352	3	0.93352	0.93341	0.999997	17667	0
YPEL5	4	0.0042057	0.014801	0.794623	353	3	0.85147	0.85121	0.999997	16093	0
PFDN1	4	0.0042106	0.014818	0.794623	354	3	0.99126	0.99127	0.999997	18843	0
NAA15	4	0.0042222	0.01485	0.794623	355	4	0.99578	0.99579	0.999997	18988	0
MED29	4	0.0042579	0.014965	0.794623	356	3	0.98197	0.982	0.999997	18620	0
NDUFB5	4	0.0042646	0.014988	0.794623	357	3	0.98205	0.98209	0.999997	18623	0
FAM229A	4	0.0042762	0.015036	0.794623	358	4	0.99572	0.99574	0.999997	18987	0
NRBP1	4	0.004278	0.015043	0.794623	359	4	0.99572	0.99574	0.999997	18986	0
MARS	4	0.0042964	0.015114	0.794623	360	4	0.9957	0.99572	0.999997	18985	0
NPIPB3	4	0.0043096	0.015152	0.794623	361	4	0.99569	0.99571	0.999997	18984	0
RBM18	4	0.0043101	0.015154	0.794623	362	1	0.62462	0.6244	0.999997	11814	0
MRPS18C	4	0.0043431	0.015268	0.794623	363	4	0.99566	0.99567	0.999997	18983	0
RPAIN	4	0.00436	0.015319	0.794623	364	4	0.99564	0.99565	0.999997	18981	0
OR2T2	4	0.0043622	0.015324	0.794623	365	2	0.93717	0.93703	0.999997	17743	0
RFXAP	4	0.0043676	0.015344	0.794623	366	3	0.92894	0.92878	0.999997	17562	0
ZBTB45	4	0.0043795	0.015392	0.794623	367	4	0.99562	0.99563	0.999997	18980	0
ZNF202	4	0.0043804	0.015395	0.794623	368	4	0.99562	0.99563	0.999997	18979	0
MYH6	4	0.0043897	0.015422	0.794623	369	3	0.99108	0.99107	0.999997	18839	0
DICER1	4	0.0043902	0.015424	0.794623	370	4	0.99561	0.99562	0.999997	18978	0
TP53I11	4	0.0044144	0.015503	0.794623	371	1	0.4651	0.46913	0.999997	8879	1
TIMELESS	4	0.004426	0.015535	0.794623	372	4	0.99557	0.99558	0.999997	18977	0
MPP1	4	0.0044485	0.015608	0.794623	373	4	0.99555	0.99556	0.999997	18976	0
CDX2	4	0.0044548	0.015626	0.794623	374	4	0.99555	0.99555	0.999997	18975	0
RPE65	4	0.0044665	0.015663	0.794623	375	2	0.71568	0.71556	0.999997	13511	0
GABRB3	4	0.0044829	0.015717	0.794623	376	4	0.99552	0.99553	0.999997	18974	0
MED26	4	0.0045187	0.015829	0.794623	377	1	0.82534	0.82515	0.999997	15587	0
PRR35	4	0.0045284	0.015865	0.794623	378	4	0.99547	0.99548	0.999997	18973	0
OR6T1	4	0.004535	0.015888	0.794623	379	2	0.24008	0.29443	0.999997	5611	1
MAPK1	4	0.0045525	0.015939	0.794623	380	3	0.61647	0.61624	0.999997	11663	0
SLC5A8	4	0.004559	0.015971	0.794623	381	3	0.98307	0.98314	0.999997	18641	0
PAGE4	4	0.0045641	0.015989	0.794623	382	2	0.78527	0.78528	0.999997	14787	0
LEFTY1	4	0.0045899	0.016083	0.794623	383	4	0.99541	0.99542	0.999997	18971	0
RPL31	4	0.0045975	0.01611	0.794623	384	3	0.99332	0.99334	0.999997	18908	0
POLR1C	4	0.0046158	0.016167	0.794623	385	4	0.99538	0.9954	0.999997	18970	0
ANKMY2	4	0.004623	0.016189	0.794623	386	1	0.47903	0.48176	0.999997	9101	1
RRP36	4	0.004652	0.016287	0.794623	387	4	0.99535	0.99537	0.999997	18969	0
NEUROG2	4	0.0046751	0.016345	0.794623	388	1	0.60843	0.60822	0.999997	11506	0
PDIA3	4	0.0046816	0.016363	0.794623	389	3	0.024805	0.057071	0.952239	1141	1
PLK1	4	0.0046846	0.016371	0.794623	390	3	0.99046	0.99048	0.999997	18821	0
ERCC2	4	0.0046879	0.016379	0.794623	391	3	0.99258	0.99258	0.999997	18885	0
TRMU	4	0.0047273	0.016469	0.794623	392	2	0.90159	0.9012	0.999997	17058	0
C9orf84	4	0.0047292	0.016474	0.794623	393	3	0.88244	0.88204	0.999997	16669	0
EMC1	4	0.0047374	0.01649	0.794623	394	3	0.98831	0.98838	0.999997	18775	0
LAMTOR3	4	0.0047507	0.01652	0.794623	395	3	0.9539	0.95376	0.999997	18062	0
SOX14	4	0.0047524	0.016524	0.794623	396	3	0.94524	0.94498	0.999997	17891	0
MFN2	4	0.0047773	0.016581	0.794623	397	3	0.99326	0.99327	0.999997	18904	0
TSC1	4	0.0047791	0.016585	0.794623	398	2	0.54644	0.54607	0.999997	10346	0
JMJD7-PLA2G4B	4	0.0047794	0.016588	0.794623	399	2	0.45783	0.46273	0.999997	8746	1
TMEM41A	4	0.0048218	0.01669	0.794702	400	2	0.75715	0.75697	0.999997	14280	0
PPID	4	0.0048303	0.016711	0.794702	401	2	0.10027	0.16696	0.994071	3207	2
NUDCD2	4	0.0048316	0.016714	0.794702	402	1	0.46014	0.46476	0.999997	8793	1
EI24	4	0.0048797	0.016822	0.79638	403	3	0.82764	0.82741	0.999997	15621	0
NAGPA	4	0.0048837	0.016833	0.79638	404	2	0.04017	0.079933	0.973615	1562	1
PSRC1	4	0.0049358	0.016971	0.800941	405	2	0.82129	0.82118	0.999997	15498	0
PLD1	4	0.0049578	0.017031	0.801822	406	3	0.92179	0.92149	0.999997	17426	0
ANKIB1	4	0.004988	0.017113	0.802308	407	1	0.61176	0.61155	0.999997	11581	0
DDX21	4	0.0049937	0.017126	0.802308	408	3	0.95188	0.9517	0.999997	18028	0
RPEL1	4	0.0050401	0.017253	0.805627	409	2	0.60241	0.60218	0.999997	11387	0
BMS1	4	0.0050511	0.017281	0.805627	410	2	0.694	0.69365	0.999997	13117	0
NOTUM	4	0.005073	0.017326	0.805774	411	2	0.94479	0.94454	0.999997	17880	0
SLC47A2	4	0.0051164	0.017438	0.806198	412	3	0.73646	0.73628	0.999997	13886	0
FAM198A	4	0.0051258	0.017465	0.806198	413	2	0.028855	0.063146	0.963816	1250	1
PLGLB1	4	0.0051443	0.017506	0.806198	414	1	0.12452	0.20155	0.99574	3864	1
KDM4B	4	0.0051788	0.017587	0.806198	415	3	0.43027	0.43899	0.999997	8312	1
LXN	4	0.0051965	0.01763	0.806198	416	2	0.37405	0.39288	0.999997	7431	1
SRP14	4	0.005197	0.01763	0.806198	417	3	0.8525	0.85223	0.999997	16109	0
HMOX2	4	0.0052058	0.017649	0.806198	418	3	0.97916	0.97913	0.999997	18555	0
PRRX2	4	0.0052187	0.017673	0.806198	419	2	0.98023	0.98022	0.999997	18580	0
P2RY13	4	0.0052486	0.017743	0.807001	420	2	0.80366	0.80362	0.999997	15153	0
UBA3	4	0.0052605	0.017775	0.807001	421	3	0.99419	0.99422	0.999997	18931	0
ALG1L2	4	0.0052819	0.017829	0.807552	422	3	0.74194	0.74166	0.999997	13991	0
NAIP	4	0.0053007	0.017877	0.807779	423	1	0.84949	0.84923	0.999997	16057	0
ARHGEF12	4	0.0053214	0.017931	0.807779	424	2	0.95441	0.95424	0.999997	18072	0
CDC34	4	0.0053483	0.017995	0.807779	425	2	0.50547	0.50629	0.999997	9582	1
GJA1	4	0.0053528	0.018003	0.807779	426	1	0.38222	0.39942	0.999997	7559	1
PELO	4	0.0054024	0.018107	0.808015	427	3	0.98844	0.98851	0.999997	18779	0
EED	4	0.005405	0.01811	0.808015	428	2	0.86083	0.8606	0.999997	16262	0
GRSF1	4	0.0054145	0.018135	0.808015	429	3	0.96628	0.96614	0.999997	18303	0
ZNF436	4	0.0054571	0.018231	0.810396	430	2	0.35551	0.37838	0.999997	7157	1
MBD3L3	4	0.0055092	0.018348	0.813546	431	3	0.99247	0.99247	0.999997	18879	0
SCUBE1	4	0.0055842	0.018522	0.813546	432	3	0.64576	0.6456	0.999997	12199	0
AAR2	4	0.005586	0.018527	0.813546	433	3	0.49131	0.49297	0.999997	9326	1
DYNLRB1	4	0.0056063	0.018573	0.813546	434	3	0.66724	0.66695	0.999997	12589	0
POP7	4	0.0056076	0.018577	0.813546	435	2	0.94938	0.94917	0.999997	17976	0
KCNQ2	4	0.0056134	0.018591	0.813546	436	1	0.59704	0.59677	0.999997	11285	0
SAFB2	4	0.0056174	0.0186	0.813546	437	3	0.94576	0.94552	0.999997	17901	0
ZNF658	4	0.0056722	0.018731	0.817386	438	3	0.87326	0.87288	0.999997	16506	0
NDUFB10	4	0.0056953	0.018789	0.818072	439	2	0.83656	0.83624	0.999997	15795	0
NGRN	4	0.0057176	0.018845	0.818666	440	1	0.42338	0.43319	0.999997	8211	1
ANKRD13C	4	0.0057697	0.018964	0.821637	441	1	0.11997	0.1951	0.995677	3744	2
SEMA4F	4	0.0057884	0.019007	0.821637	442	2	0.79556	0.79556	0.999997	14976	0
PELI1	4	0.0058043	0.019043	0.821637	443	3	0.99446	0.9945	0.999997	18942	0
VCAM1	4	0.0058633	0.019193	0.823747	444	2	0.8811	0.88069	0.999997	16646	0
SSTR1	4	0.0058739	0.019216	0.823747	445	2	0.86291	0.86265	0.999997	16293	0
HAPLN2	4	0.0058774	0.019221	0.823747	446	2	0.95547	0.95528	0.999997	18099	0
KIAA0020	4	0.005926	0.019347	0.825705	447	3	0.99267	0.99268	0.999997	18890	0
GPR161	4	0.0059293	0.019353	0.825705	448	2	0.57282	0.57262	0.999997	10845	0
FAU	4	0.0059548	0.019414	0.826468	449	3	0.93703	0.9369	0.999997	17740	0
APP	4	0.0059781	0.01947	0.826986	450	1	0.78951	0.78953	0.999997	14872	0
TANGO6	4	0.0059991	0.019524	0.827457	451	3	0.95258	0.95242	0.999997	18042	0
ETV2	4	0.0060302	0.019602	0.828125	452	1	0.79502	0.79504	0.999997	14970	0
SOD1	4	0.0060417	0.019633	0.828125	453	3	0.97237	0.9723	0.999997	18419	0
LRAT	4	0.006063	0.019677	0.828125	454	3	0.91861	0.9183	0.999997	17375	0
OSGEP	4	0.0060823	0.019713	0.828125	455	1	0.01197	0.031334	0.902628	660	3
THEGL	4	0.0061344	0.019836	0.828927	456	1	0.6654	0.66509	0.999997	12552	0
GEMIN6	4	0.0061381	0.019848	0.828927	457	3	0.67849	0.67821	0.999997	12812	0
PPFIA2	4	0.006143	0.019862	0.828927	458	3	0.98759	0.98767	0.999997	18763	0
LRRC4	4	0.006196	0.019992	0.830093	459	3	0.59667	0.59641	0.999997	11276	0
AGFG2	4	0.0062385	0.020092	0.830093	460	1	0.27502	0.31864	0.999997	6070	1
ZNF280A	4	0.0062454	0.020109	0.830093	461	3	0.18542	0.25804	0.997942	4926	1
KCNA5	4	0.0062613	0.020144	0.830093	462	3	0.44263	0.4495	0.999997	8503	1
SH3PXD2B	4	0.0062906	0.020214	0.830093	463	1	0.53417	0.53389	0.999997	10128	1
POLR2J3	4	0.006313	0.020269	0.830093	464	3	0.98191	0.98194	0.999997	18617	0
UXT	4	0.006361	0.020399	0.830093	465	3	0.92745	0.92728	0.999997	17525	0
C6orf163	4	0.0063948	0.020477	0.830093	466	1	0.78391	0.78395	0.999997	14763	0
MAPK4	4	0.0064112	0.020519	0.830093	467	3	0.5918	0.59154	0.999997	11195	0
DERL2	4	0.0064303	0.020562	0.830093	468	2	0.37276	0.39188	0.999997	7414	1
TMSB15A	4	0.0064469	0.0206	0.830093	469	3	0.12962	0.20881	0.996358	4002	1
MRRF	4	0.0064989	0.020719	0.830093	470	3	0.011229	0.029543	0.902628	617	1
SRP9	4	0.0065041	0.02073	0.830093	471	3	0.72856	0.72843	0.999997	13745	0
PSMD1	4	0.0065437	0.020829	0.830093	472	2	0.87658	0.87619	0.999997	16562	0
PTX4	4	0.006551	0.020846	0.830093	473	1	0.70533	0.70506	0.999997	13315	0
PCID2	4	0.0065531	0.020853	0.830093	474	3	0.91105	0.91065	0.999997	17239	0
TRMT5	4	0.0065572	0.020864	0.830093	475	3	0.97756	0.97744	0.999997	18530	0
SS18L2	4	0.0065695	0.020893	0.830093	476	3	0.98677	0.98686	0.999997	18747	0
ATP5SL	4	0.00659	0.020937	0.830093	477	3	0.92995	0.92981	0.999997	17578	0
C16orf45	4	0.0066031	0.020971	0.830093	478	2	0.44377	0.4505	0.999997	8522	1
FGD4	4	0.0066167	0.021001	0.830093	479	3	0.75696	0.75679	0.999997	14276	0
XPO5	4	0.0066578	0.021095	0.830093	480	3	0.99295	0.99297	0.999997	18894	0
S100A12	4	0.006693	0.021184	0.830093	481	2	0.095063	0.15951	0.988199	3081	2
TEX101	4	0.0067072	0.021211	0.830093	482	1	0.11291	0.18503	0.994438	3554	2
TRIM67	4	0.0067199	0.021245	0.830093	483	3	0.98323	0.9833	0.999997	18644	0
VHL	4	0.0067231	0.02125	0.830093	484	2	0.98617	0.98624	0.999997	18733	0
MIA3	4	0.0067324	0.021274	0.830093	485	3	0.97689	0.97676	0.999997	18515	0
TRIAP1	4	0.0067345	0.021277	0.830093	486	3	0.57465	0.57447	0.999997	10878	0
SDHC	4	0.0067511	0.021316	0.830093	487	3	0.10258	0.17031	0.994071	3265	1
C3AR1	4	0.0067593	0.021332	0.830093	488	1	0.06418	0.11515	0.983329	2234	2
POLG2	4	0.0068033	0.02143	0.830093	489	3	0.83173	0.83147	0.999997	15701	0
OR5K3	4	0.0068086	0.021443	0.830093	490	3	0.99153	0.99152	0.999997	18856	0
TSPYL5	4	0.0068113	0.021453	0.830093	491	2	0.57294	0.57274	0.999997	10848	0
FDX1	4	0.0068634	0.021586	0.830093	492	2	0.24441	0.29741	0.999997	5663	1
OTOP3	4	0.0068794	0.021618	0.830093	493	2	0.75361	0.75345	0.999997	14208	0
HSPD1	4	0.006881	0.02162	0.830093	494	3	0.7997	0.79967	0.999997	15074	0
SMC4	4	0.0068845	0.021627	0.830093	495	3	0.054901	0.10162	0.975444	1991	1
IGFBP5	4	0.0069154	0.021701	0.830093	496	1	0.78832	0.7883	0.999997	14851	0
HEPACAM2	4	0.00692	0.021714	0.830093	497	2	0.076532	0.13306	0.987051	2567	1
PYCR1	4	0.0069353	0.021743	0.830093	498	2	0.85278	0.85251	0.999997	16115	0
PRR7	4	0.0069465	0.021764	0.830093	499	3	0.80045	0.8004	0.999997	15085	0
POFUT1	4	0.0069675	0.021817	0.830093	500	2	0.8762	0.87583	0.999997	16553	0
NDUFS2	4	0.0070103	0.021915	0.830093	501	3	0.48191	0.48433	0.999997	9149	1
OLIG1	4	0.0070196	0.021941	0.830093	502	1	0.087341	0.14852	0.988199	2859	2
MINOS1-NBL1	4	0.0070528	0.022023	0.830093	503	2	0.72749	0.72738	0.999997	13726	0
BRD4	4	0.0070716	0.022076	0.830093	504	2	0.86425	0.86396	0.999997	16317	0
NMD3	4	0.0070888	0.022126	0.830093	505	2	0.36858	0.3886	0.999997	7353	1
AQP10	4	0.0070938	0.022138	0.830093	506	3	0.92439	0.92412	0.999997	17464	0
CACNG4	4	0.0071237	0.022209	0.830093	507	2	0.88315	0.88275	0.999997	16683	0
TYW3	4	0.0071282	0.022219	0.830093	508	3	0.97413	0.97409	0.999997	18467	0
LCP2	4	0.0071476	0.022272	0.830093	509	3	0.54249	0.54212	0.999997	10272	0
ASB5	4	0.0071506	0.022276	0.830093	510	2	0.23384	0.29017	0.999997	5540	1
ABCC9	4	0.0071563	0.022292	0.830093	511	3	0.95252	0.95236	0.999997	18040	0
C9orf135	4	0.0071757	0.022332	0.830093	512	2	0.81121	0.81115	0.999997	15308	0
NAA30	4	0.0071866	0.02236	0.830093	513	3	0.95421	0.95405	0.999997	18066	0
EPHB6	4	0.0072061	0.022406	0.830093	514	3	0.71511	0.71498	0.999997	13500	0
OR2T3	4	0.0072231	0.022442	0.830093	515	2	0.21864	0.27994	0.999997	5344	1
LRRTM2	4	0.0072277	0.022453	0.830093	516	1	0.6876	0.68728	0.999997	12983	0
C2orf81	4	0.0072343	0.022465	0.830093	517	3	0.035289	0.072692	0.969604	1432	1
CPSF4	4	0.0072647	0.02254	0.830093	518	2	0.10502	0.17374	0.994071	3326	2
RAB5A	4	0.0072751	0.022568	0.830093	519	2	0.30206	0.33826	0.999997	6428	1
SPATS2	4	0.0072798	0.022583	0.830093	520	2	0.83423	0.83394	0.999997	15741	0
FABP2	4	0.0073318	0.022716	0.831882	521	1	0.12634	0.2041	0.99574	3913	2
FGF6	4	0.0073327	0.022719	0.831882	522	3	0.62762	0.62738	0.999997	11868	0
HBEGF	4	0.0073839	0.022839	0.833367	523	1	0.45885	0.46363	0.999997	8765	1
MALSU1	4	0.0073965	0.022865	0.833367	524	3	0.94969	0.94948	0.999997	17983	0
SNAP91	4	0.0074359	0.022965	0.833367	525	2	0.67627	0.67599	0.999997	12764	0
ALDH4A1	4	0.0074674	0.023041	0.833367	526	3	0.98359	0.98367	0.999997	18656	0
ALDH7A1	4	0.0074874	0.023087	0.833367	527	3	0.51897	0.51929	0.999997	9834	1
PCDHGA12	4	0.0074879	0.023089	0.833367	528	2	0.95553	0.95534	0.999997	18100	0
OR51L1	4	0.0075052	0.023126	0.833367	529	3	0.83619	0.83586	0.999997	15786	0
C12orf43	4	0.0075112	0.023139	0.833367	530	2	0.79765	0.79769	0.999997	15020	0
L3HYPDH	4	0.0075319	0.023182	0.833367	531	3	0.84257	0.84223	0.999997	15917	0
DYNC1LI1	4	0.00754	0.023195	0.833367	532	3	0.89925	0.89883	0.999997	17010	0
ISCA2	4	0.0075695	0.023279	0.834813	533	2	0.56292	0.56264	0.999997	10657	0
TMEM130	4	0.007592	0.023327	0.834974	534	2	0.95486	0.95468	0.999997	18090	0
ESRRG	4	0.007644	0.023444	0.836018	535	1	0.6608	0.6605	0.999997	12470	0
PSMC4	4	0.0076667	0.023495	0.836018	536	3	0.27498	0.31861	0.999997	6069	1
CENPC	4	0.007687	0.023545	0.836018	537	3	0.98987	0.98991	0.999997	18814	0
TSGA10	4	0.0077369	0.023655	0.836018	538	3	0.99357	0.99358	0.999997	18912	0
COG4	4	0.0077455	0.023671	0.836018	539	2	0.80513	0.8051	0.999997	15187	0
TET1	4	0.0077481	0.023676	0.836018	540	2	0.57912	0.57887	0.999997	10955	0
FAM127B	4	0.0077916	0.023777	0.836018	541	3	0.9913	0.9913	0.999997	18844	0
SBDS	4	0.0077984	0.023791	0.836018	542	3	0.8591	0.85885	0.999997	16233	0
CHMP3	4	0.0078001	0.023795	0.836018	543	2	0.75909	0.75892	0.999997	14314	0
IL1RL2	4	0.0078144	0.023827	0.836018	544	3	0.52567	0.52567	0.999997	9959	1
WDR24	4	0.0078208	0.023842	0.836018	545	2	0.71554	0.71541	0.999997	13509	0
PEX14	4	0.0078419	0.023902	0.836018	546	3	0.99496	0.995	0.999997	18958	0
USP17L10	4	0.0078521	0.023925	0.836018	547	2	0.8979	0.89749	0.999997	16984	0
ESPL1	4	0.0079126	0.024074	0.839678	548	3	0.12849	0.20717	0.995953	3976	1
SEPSECS	4	0.0079562	0.024173	0.841611	549	2	0.95647	0.95631	0.999997	18118	0
EIF2AK4	4	0.0080452	0.024393	0.847505	550	3	0.98461	0.9847	0.999997	18691	0
CYR61	4	0.0080602	0.024431	0.847505	551	1	0.1361	0.21803	0.996358	4170	2
SMPD4	4	0.0080989	0.024527	0.848755	552	3	0.73173	0.73155	0.999997	13795	0
SORBS1	4	0.0081122	0.024556	0.848755	553	1	0.2737	0.3177	0.999997	6051	1
SFI1	4	0.0081642	0.024682	0.851566	554	2	0.80529	0.80526	0.999997	15191	0
MVD	4	0.0082162	0.024803	0.854206	555	1	0.92969	0.92954	0.999997	17573	0
GATB	4	0.0082682	0.024934	0.857157	556	2	0.81992	0.8198	0.999997	15476	0
PTP4A3	4	0.0083135	0.02505	0.85868	557	3	0.14004	0.22362	0.996358	4270	1
PDDC1	4	0.0083202	0.025068	0.85868	558	1	0.41897	0.42952	0.999997	8136	1
ATP13A5	4	0.0083722	0.025191	0.85972	559	2	0.9171	0.91682	0.999997	17348	0
ERBB4	4	0.0084242	0.025315	0.85972	560	1	0.78371	0.78375	0.999997	14758	0
PRDM9	4	0.0084353	0.025339	0.85972	561	2	0.56579	0.56549	0.999997	10707	0
NR3C1	4	0.0084409	0.025357	0.85972	562	2	0.41488	0.4261	0.999997	8073	1
KRTAP10-6	4	0.0084744	0.025447	0.85972	563	2	0.28349	0.32477	0.999997	6178	1
CCNC	4	0.0084762	0.025452	0.85972	564	2	0.34859	0.37305	0.999997	7056	1
NR4A1	4	0.00848	0.025457	0.85972	565	2	0.78098	0.78102	0.999997	14719	0
ARPC4	4	0.0085173	0.025551	0.85972	566	3	0.96015	0.95999	0.999997	18187	0
DUSP15	4	0.0085245	0.025566	0.85972	567	3	0.42811	0.43716	0.999997	8285	1
MMP3	4	0.0085282	0.025574	0.85972	568	1	0.075447	0.13149	0.987051	2538	1
ADPRHL2	4	0.0085439	0.025607	0.85972	569	3	0.99393	0.99397	0.999997	18922	0
ADGRG5	4	0.0085802	0.025703	0.85972	570	1	0.39496	0.40969	0.999997	7764	1
AGTRAP	4	0.0085811	0.025704	0.85972	571	2	0.87309	0.87272	0.999997	16502	0
RAB30	4	0.0086265	0.025817	0.85972	572	3	0.86691	0.86663	0.999997	16375	0
TNFAIP8L2	4	0.0086289	0.025822	0.85972	573	3	0.69687	0.69655	0.999997	13175	0
CEP41	4	0.0086431	0.025852	0.85972	574	3	0.74432	0.74407	0.999997	14037	0
DTNB	4	0.0086657	0.025909	0.85972	575	2	0.88973	0.88935	0.999997	16821	0
COX8A	4	0.0086842	0.025958	0.85972	576	3	0.98844	0.98851	0.999997	18778	0
GNB2L1	4	0.0087046	0.026005	0.85972	577	3	0.98653	0.98663	0.999997	18741	0
GAN	4	0.0087362	0.02608	0.85972	578	3	0.96903	0.96892	0.999997	18356	0
DRD3	4	0.0087414	0.026097	0.85972	579	3	0.72474	0.72462	0.999997	13674	0
RAB20	4	0.0087508	0.026121	0.85972	580	2	0.33625	0.36358	0.999997	6884	1
TFAP4	4	0.0087735	0.02618	0.85972	581	3	0.33259	0.36079	0.999997	6833	1
RPS6KB2	4	0.0088134	0.026258	0.85972	582	3	0.13957	0.22298	0.996358	4256	1
HIRA	4	0.0088248	0.026284	0.85972	583	3	0.99261	0.99262	0.999997	18888	0
TMEM131	4	0.0088305	0.026296	0.85972	584	2	0.092838	0.15636	0.988199	3020	1
ADAMTSL5	4	0.0088401	0.026321	0.85972	585	3	0.23812	0.29308	0.999997	5591	1
OR2T35	4	0.0088819	0.026411	0.85972	586	2	0.94624	0.94601	0.999997	17911	0
ADAD2	4	0.0089106	0.026494	0.85972	587	3	0.98193	0.98197	0.999997	18619	0
OR2AG2	4	0.0089441	0.026581	0.85972	588	2	0.83253	0.83226	0.999997	15714	0
OLFM2	4	0.0089565	0.026614	0.85972	589	2	0.13475	0.21607	0.996358	4128	1
RPL26L1	4	0.0089917	0.026701	0.85972	590	3	0.75796	0.75779	0.999997	14295	0
F12	4	0.0089961	0.026709	0.85972	591	1	0.66487	0.66454	0.999997	12541	0
KIAA1107	4	0.0090218	0.026764	0.85972	592	3	0.96647	0.96634	0.999997	18311	0
CARTPT	4	0.0090318	0.026786	0.85972	593	3	0.92996	0.92982	0.999997	17579	0
NUPL2	4	0.009048	0.026824	0.85972	594	1	0.052981	0.098786	0.974723	1934	2
RCC1	4	0.0090745	0.026889	0.85972	595	3	0.83766	0.83734	0.999997	15821	0
WDR1	4	0.0090949	0.026928	0.85972	596	2	0.84761	0.84729	0.999997	16016	0
LPXN	4	0.0091	0.026939	0.85972	597	1	0.041419	0.081805	0.973615	1596	2
SYNDIG1	4	0.0091098	0.026959	0.85972	598	3	0.7809	0.78094	0.999997	14716	0
SWI5	4	0.0091122	0.026967	0.85972	599	2	0.90788	0.90744	0.999997	17184	0
SETD8	4	0.0091375	0.027031	0.85972	600	3	0.98913	0.98918	0.999997	18795	0
WDR43	4	0.009152	0.02707	0.85972	601	1	0.56679	0.56649	0.999997	10721	0
MIA2	4	0.0091704	0.027116	0.85972	602	3	0.87905	0.87862	0.999997	16612	0
PRDM6	4	0.009173	0.027122	0.85972	603	3	0.40725	0.41979	0.999997	7959	1
MED6	4	0.0092459	0.027285	0.862192	604	2	0.57578	0.5756	0.999997	10899	0
SARNP	4	0.0092559	0.027309	0.862192	605	1	0.45733	0.4623	0.999997	8737	1
CTDSPL2	4	0.0092823	0.027369	0.862192	606	3	0.30433	0.33989	0.999997	6463	1
CDC37L1	4	0.0093079	0.02742	0.862192	607	2	0.13061	0.2102	0.996358	4030	1
OBP2A	4	0.0093102	0.027426	0.862192	608	3	0.98537	0.98546	0.999997	18710	0
ATXN7L3	4	0.0093394	0.027488	0.862727	609	2	0.0026399	0.0079489	0.89884	162	1
TMEM211	4	0.0093598	0.027541	0.862985	610	1	0.0060591	0.016672	0.902628	349	3
KLK4	4	0.0094118	0.027677	0.864662	611	1	0.0039557	0.011358	0.89884	230	2
NDUFA2	4	0.0094156	0.027685	0.864662	612	3	0.86782	0.86752	0.999997	16395	0
OR4A15	4	0.0094637	0.027804	0.86695	613	1	0.7295	0.72939	0.999997	13763	0
RAD51	4	0.0094983	0.027876	0.867625	614	3	0.78606	0.78607	0.999997	14808	0
IAPP	4	0.0095157	0.027916	0.867625	615	2	0.92036	0.92002	0.999997	17405	0
ZNF250	4	0.0095677	0.028053	0.868394	616	3	0.90138	0.901	0.999997	17054	0
DKC1	4	0.0096205	0.028175	0.868394	617	3	0.27855	0.32115	0.999997	6117	1
NT5C3A	4	0.0096346	0.028212	0.868394	618	3	0.87325	0.87288	0.999997	16505	0
UHRF1	4	0.0096362	0.028216	0.868394	619	3	0.68801	0.68768	0.999997	12993	0
SLC25A19	4	0.0096465	0.028246	0.868394	620	2	0.73778	0.73758	0.999997	13915	0
CGB	4	0.0096716	0.028297	0.868394	621	2	0.90205	0.90166	0.999997	17074	0
TYSND1	4	0.009699	0.02836	0.868394	622	3	0.91485	0.91447	0.999997	17308	0
LOC101928436	4	0.0097235	0.02842	0.868394	623	2	0.81479	0.81473	0.999997	15378	0
MAL	4	0.0097598	0.028503	0.868394	624	3	0.97205	0.97197	0.999997	18410	0
INTS5	4	0.0097727	0.028535	0.868394	625	3	0.987	0.98708	0.999997	18750	0
CPSF3	4	0.0097806	0.028558	0.868394	626	3	0.72492	0.72479	0.999997	13678	0
GMFG	4	0.0097898	0.028573	0.868394	627	2	0.94822	0.94803	0.999997	17944	0
ISY1	4	0.0098257	0.028658	0.868394	628	3	0.96127	0.96113	0.999997	18207	0
TKT	4	0.0098274	0.028659	0.868394	629	2	0.90991	0.90951	0.999997	17217	0
EXT2	4	0.0098308	0.028665	0.868394	630	3	0.99414	0.99418	0.999997	18930	0
ZAR1L	4	0.0098706	0.028763	0.868394	631	3	0.94301	0.94277	0.999997	17851	0
TNFSF13	4	0.0098793	0.028791	0.868394	632	2	0.79037	0.79042	0.999997	14894	0
PIGT	4	0.0098858	0.02881	0.868394	633	2	0.64809	0.64787	0.999997	12237	0
METTL23	4	0.009928	0.0289	0.868394	634	2	0.97251	0.97247	0.999997	18424	0
SH2D4A	4	0.0099313	0.028911	0.868394	635	2	0.86524	0.86493	0.999997	16345	0
EEF2KMT	4	0.0099642	0.028994	0.868394	636	2	0.86592	0.86562	0.999997	16357	0
MRE11A	4	0.0099832	0.029043	0.868394	637	1	0.25508	0.30472	0.999997	5810	1
RENBP	4	0.010031	0.029144	0.868394	638	2	0.023152	0.05461	0.95151	1097	2
OR5F1	4	0.010035	0.029154	0.868394	639	2	0.89782	0.89739	0.999997	16979	0
COX4I1	4	0.010041	0.029167	0.868394	640	3	0.45789	0.46278	0.999997	8748	1
VSIG8	4	0.010071	0.029246	0.868394	641	3	0.64945	0.64921	0.999997	12263	0
SUN2	4	0.010082	0.029274	0.868394	642	3	0.99299	0.99302	0.999997	18899	0
CIAO1	4	0.010087	0.029289	0.868394	643	3	0.21302	0.27617	0.9999	5276	1
CENPM	4	0.010109	0.029335	0.868394	644	3	0.49624	0.49753	0.999997	9414	1
KLRC4	4	0.010127	0.029385	0.868394	645	3	0.97466	0.9746	0.999997	18475	0
MSI1	4	0.010152	0.029437	0.868394	646	2	0.56977	0.56953	0.999997	10787	0
C14orf39	4	0.010183	0.029498	0.868394	647	2	0.29472	0.33295	0.999997	6341	1
KIAA0391	4	0.010211	0.029569	0.868394	648	3	0.97337	0.97332	0.999997	18445	0
ASAP1	4	0.010226	0.029606	0.868394	649	2	0.66099	0.66069	0.999997	12474	0
SRRM1	4	0.010232	0.029621	0.868394	650	2	0.93848	0.93831	0.999997	17769	0
SSU72	4	0.010243	0.029645	0.868394	651	1	0.67178	0.6715	0.999997	12680	0
SP140L	4	0.010295	0.029761	0.868394	652	1	0.91199	0.91161	0.999997	17258	0
INO80	4	0.010312	0.029807	0.868394	653	3	0.93563	0.93555	0.999997	17712	0
RBFA	4	0.010317	0.029821	0.868394	654	3	0.97234	0.97228	0.999997	18416	0
PRIM2	4	0.010347	0.029886	0.868394	655	2	0.32155	0.35252	0.999997	6695	1
NELFCD	4	0.010354	0.0299	0.868394	656	2	0.26069	0.30862	0.999997	5890	1
HIST1H2AC	4	0.010379	0.029952	0.868394	657	3	0.75884	0.75867	0.999997	14310	0
CNOT3	4	0.010399	0.030003	0.868394	658	2	0.77288	0.77282	0.999997	14577	0
NOL4L	4	0.010422	0.03006	0.868394	659	2	0.92893	0.92876	0.999997	17561	0
ITGA11	4	0.010446	0.030114	0.868394	660	3	0.5603	0.56	0.999997	10610	0
POTEB	4	0.010478	0.030185	0.868394	661	2	0.98527	0.98536	0.999997	18706	0
MMP24	4	0.010502	0.030239	0.868394	662	2	0.51718	0.51759	0.999997	9798	1
POLR2E	4	0.010529	0.030303	0.868394	663	3	0.9635	0.96335	0.999997	18250	0
KRTAP9-2	4	0.010554	0.030366	0.868394	664	1	0.056105	0.1034	0.979366	2016	1
ZBED6CL	4	0.010579	0.030424	0.868394	665	3	0.91525	0.91487	0.999997	17316	0
GLTSCR2	4	0.010589	0.030454	0.868394	666	2	0.97512	0.97505	0.999997	18483	0
CAMKK1	4	0.010606	0.030513	0.868394	667	2	0.65544	0.65512	0.999997	12375	0
LCN2	4	0.01062	0.030551	0.868394	668	2	0.085628	0.14604	0.988199	2815	2
LOC100129697	4	0.010652	0.030613	0.868394	669	2	0.37357	0.39251	0.999997	7424	1
KCNJ4	4	0.010654	0.030616	0.868394	670	3	0.86881	0.86848	0.999997	16420	0
SPATA31A1	4	0.010658	0.030627	0.868394	671	2	0.28504	0.32587	0.999997	6206	1
TAS1R1	4	0.010689	0.030698	0.868394	672	2	0.84206	0.84174	0.999997	15905	0
NEDD4L	4	0.010701	0.030735	0.868394	673	2	0.61947	0.61928	0.999997	11717	0
MLEC	4	0.01071	0.030759	0.868394	674	3	0.65459	0.65425	0.999997	12355	0
NCALD	4	0.01071	0.030759	0.868394	675	1	0.49386	0.4953	0.999997	9377	1
METTL16	4	0.01072	0.030786	0.868394	676	2	0.88916	0.88875	0.999997	16809	0
TAF7L	4	0.010743	0.030839	0.868394	677	3	0.98801	0.98808	0.999997	18771	0
ADPRH	4	0.010762	0.030887	0.868394	678	1	0.72658	0.72645	0.999997	13710	0
DCST1	4	0.010777	0.030919	0.868394	679	2	0.64171	0.64145	0.999997	12129	0
RUVBL2	4	0.010814	0.031	0.868394	680	3	0.53799	0.5376	0.999997	10198	1
CD3G	4	0.010814	0.031	0.868394	681	1	0.23807	0.29305	0.999997	5590	1
RPP21	4	0.010853	0.031096	0.868394	682	3	0.93032	0.93021	0.999997	17585	0
KRI1	4	0.010858	0.031111	0.868394	683	2	0.0015428	0.0050569	0.858698	111	1
LST1	4	0.010866	0.031131	0.868394	684	2	0.9454	0.94514	0.999997	17892	0
SPATA5L1	4	0.010877	0.031162	0.868394	685	2	0.97058	0.97048	0.999997	18384	0
CTPS1	4	0.010918	0.031269	0.868394	686	2	0.68681	0.68651	0.999997	12966	0
MBIP	4	0.010946	0.031332	0.868394	687	2	0.85907	0.85883	0.999997	16232	0
CNFN	4	0.01097	0.031375	0.868394	688	1	0.28309	0.32448	0.999997	6174	1
MMP25	4	0.011035	0.031528	0.868394	689	2	0.92711	0.92694	0.999997	17517	0
IGBP1	4	0.011073	0.031621	0.868394	690	2	0.37908	0.39692	0.999997	7511	1
JKAMP	4	0.011073	0.031623	0.868394	691	2	0.71969	0.71962	0.999997	13589	0
ZCCHC9	4	0.011079	0.031636	0.868394	692	3	0.9489	0.94867	0.999997	17965	0
NOA1	4	0.011086	0.031659	0.868394	693	3	0.98706	0.98714	0.999997	18754	0
SLC27A4	4	0.011124	0.031767	0.868394	694	2	0.056906	0.10453	0.979846	2039	1
MID1	4	0.011125	0.031773	0.868394	695	2	0.84296	0.84263	0.999997	15927	0
MTL5	4	0.011137	0.031801	0.868394	696	2	0.58054	0.58029	0.999997	10982	0
TIGD3	4	0.011143	0.031811	0.868394	697	3	0.62964	0.62945	0.999997	11908	0
GBP1	4	0.011149	0.031828	0.868394	698	2	0.11353	0.18591	0.994438	3572	1
LTBP3	4	0.011177	0.031892	0.868394	699	1	0.84666	0.84639	0.999997	15996	0
OR7G2	4	0.011177	0.031892	0.868394	700	3	0.77984	0.77984	0.999997	14693	0
TINF2	4	0.011181	0.031903	0.868394	701	3	0.63189	0.63169	0.999997	11953	0
CPO	4	0.011258	0.032085	0.868394	702	3	0.42376	0.4335	0.999997	8219	1
CAMSAP2	4	0.011281	0.032144	0.868394	703	1	0.084251	0.14405	0.988199	2774	2
KLF13	4	0.011293	0.032175	0.868394	704	3	0.67341	0.67314	0.999997	12714	0
PCDH19	4	0.011296	0.032184	0.868394	705	3	0.518	0.51837	0.999997	9818	1
ANKRD17	4	0.011309	0.032223	0.868394	706	2	0.33506	0.36267	0.999997	6868	1
ICOSLG	4	0.011315	0.032237	0.868394	707	2	0.79707	0.79709	0.999997	15009	0
CTR9	4	0.011333	0.032278	0.868394	708	3	0.99393	0.99397	0.999997	18923	0
LMNB2	4	0.011385	0.032405	0.868394	709	2	0.1257	0.2032	0.99574	3897	1
MROH9	4	0.011437	0.032528	0.868394	710	1	0.94942	0.94922	0.999997	17977	0
FAIM3	4	0.011488	0.03265	0.868394	711	1	0.40856	0.42088	0.999997	7978	1
ADD2	4	0.01149	0.032653	0.868394	712	3	0.62074	0.62058	0.999997	11738	0
CPB1	4	0.011523	0.032728	0.868394	713	3	0.28198	0.32366	0.999997	6160	1
TRA2B	4	0.01154	0.032768	0.868394	714	2	0.83915	0.83882	0.999997	15849	0
ARHGEF5	4	0.011554	0.032797	0.868394	715	2	0.77702	0.77697	0.999997	14649	0
ACHE	4	0.011592	0.032893	0.868394	716	2	0.64656	0.64637	0.999997	12207	0
TGIF2-C20orf24	4	0.011631	0.032992	0.868394	717	3	0.94008	0.93991	0.999997	17801	0
CLEC4D	4	0.011638	0.033002	0.868394	718	2	0.31826	0.35008	0.999997	6656	1
BLMH	4	0.011644	0.033014	0.868394	719	2	0.60065	0.60042	0.999997	11354	0
XRCC6	4	0.011649	0.033024	0.868394	720	3	0.022389	0.053466	0.946634	1079	1
STARD7	4	0.011658	0.033041	0.868394	721	2	0.9381	0.93794	0.999997	17758	0
TNFRSF25	4	0.011681	0.033097	0.868394	722	3	0.98717	0.98724	0.999997	18755	0
LSM6	4	0.011696	0.033129	0.868394	723	2	0.91854	0.91823	0.999997	17373	0
COPS3	4	0.011714	0.03317	0.868394	724	3	0.98011	0.98011	0.999997	18576	0
MBNL3	4	0.011723	0.033189	0.868394	725	2	0.52669	0.52666	0.999997	9984	1
IL2RB	4	0.011748	0.033249	0.868394	726	1	0.6919	0.69156	0.999997	13077	0
HSBP1	4	0.011768	0.033296	0.868394	727	2	0.31841	0.35019	0.999997	6658	1
FXN	4	0.011795	0.033358	0.868394	728	3	0.94518	0.94493	0.999997	17888	0
CLEC12A	4	0.0118	0.033368	0.868394	729	1	0.81621	0.81614	0.999997	15403	0
MRPS12	4	0.011852	0.0335	0.868394	730	2	0.48995	0.49167	0.999997	9297	1
PEX11G	4	0.011866	0.033528	0.868394	731	3	0.078551	0.13599	0.987051	2629	1
HOXA1	4	0.011867	0.03353	0.868394	732	2	0.80723	0.80721	0.999997	15231	0
RNGTT	4	0.011869	0.033533	0.868394	733	3	0.92544	0.92517	0.999997	17487	0
ZNF574	4	0.011903	0.03361	0.868394	734	2	0.85071	0.85048	0.999997	16076	0
ASAP3	4	0.011967	0.033764	0.868394	735	3	0.99132	0.99132	0.999997	18846	0
UPF1	4	0.012	0.033845	0.868394	736	3	0.97671	0.97659	0.999997	18509	0
TOMM22	4	0.012051	0.033951	0.868394	737	3	0.61624	0.61601	0.999997	11661	0
RCL1	4	0.012059	0.033965	0.868394	738	3	0.86873	0.8684	0.999997	16416	0
ACTG1	4	0.012109	0.034081	0.868394	739	3	0.99372	0.99374	0.999997	18916	0
OR5K4	4	0.01213	0.034131	0.868394	740	2	0.92402	0.92375	0.999997	17456	0
CHD3	4	0.012145	0.034169	0.868394	741	3	0.96971	0.96957	0.999997	18368	0
MMEL1	4	0.012157	0.03419	0.868394	742	3	0.98364	0.98373	0.999997	18658	0
CCL8	4	0.012163	0.034205	0.868394	743	1	0.95996	0.95979	0.999997	18182	0
ZNF438	4	0.012215	0.034318	0.868394	744	2	0.43659	0.44429	0.999997	8413	1
SELT	4	0.01223	0.03435	0.868394	745	2	0.27061	0.31553	0.999997	6015	1
GABRP	4	0.012242	0.034378	0.868394	746	3	0.49241	0.49401	0.999997	9349	1
MPHOSPH9	4	0.012266	0.034426	0.868394	747	3	0.93029	0.93018	0.999997	17584	0
SLC35B1	4	0.012294	0.034483	0.868394	748	3	0.95411	0.95396	0.999997	18065	0
SRPX2	4	0.012318	0.034542	0.868394	749	1	0.40257	0.41592	0.999997	7886	1
SRD5A3	4	0.01237	0.034668	0.868394	750	2	0.7458	0.74558	0.999997	14070	0
ICK	4	0.01241	0.034756	0.868394	751	3	0.74095	0.7407	0.999997	13971	0
C1orf64	4	0.012422	0.034788	0.868394	752	1	0.62061	0.62043	0.999997	11735	0
LSM11	4	0.012474	0.03492	0.868394	753	2	0.37585	0.39432	0.999997	7460	1
SLC25A47	4	0.012477	0.034926	0.868394	754	2	0.63093	0.63072	0.999997	11934	0
MUSTN1	4	0.012483	0.034938	0.868394	755	2	0.72885	0.72874	0.999997	13749	0
SCN8A	4	0.01249	0.034957	0.868394	756	3	0.78148	0.78152	0.999997	14727	0
MTRF1L	4	0.012526	0.035044	0.868394	757	2	0.13494	0.21634	0.996358	4132	1
RNF225	4	0.012577	0.035162	0.868394	758	2	0.38437	0.40112	0.999997	7594	1
ZSCAN22	4	0.012598	0.035213	0.868394	759	2	0.71234	0.71218	0.999997	13450	0
MMP12	4	0.012611	0.035245	0.868394	760	3	0.94883	0.94862	0.999997	17963	0
SLC9A3	4	0.012629	0.035283	0.868394	761	1	0.72014	0.72005	0.999997	13598	0
L3MBTL2	4	0.012645	0.035319	0.868394	762	3	0.99495	0.99499	0.999997	18957	0
LGALS14	4	0.012652	0.035336	0.868394	763	2	0.4159	0.42693	0.999997	8089	1
ZNF416	4	0.012681	0.035395	0.868394	764	2	0.14154	0.22573	0.996358	4308	1
ARL3	4	0.012733	0.035509	0.868394	765	2	0.73615	0.73597	0.999997	13882	0
BEND7	4	0.012753	0.035555	0.868394	766	2	0.23624	0.29177	0.999997	5567	1
ZNF883	4	0.012779	0.035618	0.868394	767	3	0.063101	0.11356	0.983329	2200	1
ALKBH3	4	0.012785	0.035633	0.868394	768	3	0.98642	0.98651	0.999997	18740	0
RARS2	4	0.012789	0.035635	0.868394	769	3	0.93816	0.93799	0.999997	17761	0
PMVK	4	0.01282	0.035717	0.868394	770	3	0.99355	0.99357	0.999997	18911	0
FAM151A	4	0.012837	0.035767	0.868394	771	3	0.5789	0.57864	0.999997	10952	0
TLE6	4	0.012842	0.035783	0.868394	772	2	0.067366	0.11981	0.985694	2322	2
PDE2A	4	0.012854	0.035809	0.868394	773	3	0.97929	0.97927	0.999997	18561	0
RPL15	4	0.012892	0.035897	0.868394	774	3	0.75086	0.7507	0.999997	14158	0
RAI1	4	0.012917	0.035965	0.868394	775	2	0.33806	0.36492	0.999997	6911	1
CDC25A	4	0.01293	0.036	0.868394	776	2	0.60157	0.60138	0.999997	11368	0
CENPA	4	0.01294	0.036019	0.868394	777	3	0.83583	0.83552	0.999997	15779	0
PCDHGA3	4	0.012952	0.036039	0.868394	778	3	0.87157	0.87118	0.999997	16469	0
PIAS3	4	0.012974	0.036093	0.868394	779	3	0.81292	0.81285	0.999997	15343	0
ART3	4	0.012992	0.036133	0.868394	780	1	0.84056	0.84022	0.999997	15881	0
STRN3	4	0.013005	0.036164	0.868394	781	3	0.42876	0.43772	0.999997	8295	1
DGCR14	4	0.013044	0.036252	0.868394	782	3	0.78855	0.78852	0.999997	14857	0
CAPN8	4	0.013044	0.036253	0.868394	783	1	0.49143	0.49309	0.999997	9329	1
BRPF1	4	0.013094	0.036362	0.868394	784	3	0.46277	0.46708	0.999997	8837	1
SON	4	0.013096	0.036363	0.868394	785	1	0.81194	0.81186	0.999997	15323	0
CIDEC	4	0.013136	0.036458	0.868394	786	2	0.00087656	0.0032051	0.769456	76	2
C18orf54	4	0.013147	0.036483	0.868394	787	1	0.82279	0.82261	0.999997	15527	0
C17orf107	4	0.013174	0.03655	0.868394	788	3	0.37714	0.39538	0.999997	7484	1
CRHR2	4	0.013187	0.036585	0.868394	789	3	0.99168	0.99169	0.999997	18858	0
IPO7	4	0.013199	0.03661	0.868394	790	1	0.60049	0.60028	0.999997	11350	0
ONECUT2	4	0.013251	0.036724	0.868394	791	1	0.57511	0.57494	0.999997	10886	0
HAUS4	4	0.013279	0.036793	0.868394	792	3	0.9199	0.91956	0.999997	17396	0
WDR73	4	0.013287	0.036815	0.868394	793	3	0.77224	0.77216	0.999997	14561	0
OR4D1	4	0.013303	0.036858	0.868394	794	1	0.67822	0.67791	0.999997	12804	0
ZMYND8	4	0.013373	0.037019	0.868394	795	3	0.9947	0.99474	0.999997	18950	0
CTH	4	0.013385	0.037049	0.868394	796	3	0.96568	0.96556	0.999997	18289	0
ATN1	4	0.013407	0.037098	0.868394	797	3	0.98395	0.98405	0.999997	18666	0
COPS2	4	0.013418	0.037125	0.868394	798	3	0.97665	0.97654	0.999997	18507	0
TFAM	4	0.013447	0.037186	0.868394	799	2	0.93995	0.93978	0.999997	17796	0
TNKS1BP1	4	0.013453	0.037197	0.868394	800	3	0.15042	0.23549	0.997004	4509	1
FAM135A	4	0.013458	0.037211	0.868394	801	2	0.68602	0.68571	0.999997	12953	0
RAD17	4	0.013528	0.037359	0.868394	802	3	0.99297	0.99299	0.999997	18896	0
WDR25	4	0.01356	0.037425	0.868394	803	3	0.96611	0.96596	0.999997	18297	0
PXDNL	4	0.013562	0.037432	0.868394	804	1	0.15347	0.23739	0.997004	4547	1
CCDC13	4	0.013589	0.037492	0.868394	805	3	0.9822	0.98224	0.999997	18627	0
C2orf54	4	0.0136	0.03751	0.868394	806	2	0.1301	0.20949	0.996358	4013	2
ZMIZ1	4	0.013614	0.037543	0.868394	807	2	0.096439	0.16147	0.988199	3122	2
SPDYE2	4	0.013654	0.037635	0.868394	808	3	0.9906	0.99063	0.999997	18823	0
SLC7A10	4	0.013658	0.037648	0.868394	809	3	0.69034	0.69001	0.999997	13043	0
DSC2	4	0.013663	0.037664	0.868394	810	2	0.81734	0.81726	0.999997	15427	0
CMPK1	4	0.013665	0.037672	0.868394	811	2	0.96066	0.96053	0.999997	18199	0
FTMT	4	0.013712	0.037781	0.868394	812	3	0.9113	0.91091	0.999997	17243	0
OR2A12	4	0.013717	0.037793	0.868394	813	1	0.67255	0.67227	0.999997	12694	0
PBOV1	4	0.013719	0.037797	0.868394	814	2	0.12995	0.20928	0.996358	4008	1
USP17L19	4	0.01373	0.037817	0.868394	815	3	0.20635	0.2717	0.999047	5195	1
FLI1	4	0.013736	0.037827	0.868394	816	3	0.034321	0.071287	0.968535	1404	1
C11orf87	4	0.013747	0.037851	0.868394	817	2	0.073719	0.129	0.987051	2490	1
MRPL54	4	0.013766	0.037893	0.868394	818	3	0.68464	0.68431	0.999997	12925	0
C8orf82	4	0.013789	0.037947	0.868394	819	3	0.79036	0.79041	0.999997	14893	0
VPS52	4	0.013792	0.037956	0.868394	820	3	0.84758	0.84728	0.999997	16015	0
OLFML3	4	0.013821	0.038012	0.868394	821	2	0.64096	0.64073	0.999997	12115	0
TTYH1	4	0.013821	0.038014	0.868394	822	3	0.96578	0.96564	0.999997	18290	0
TMEM241	4	0.013831	0.03804	0.868394	823	2	0.097014	0.1623	0.988199	3133	1
MAPK3	4	0.013838	0.038057	0.868394	824	2	0.71913	0.71907	0.999997	13581	0
KTI12	4	0.013852	0.038094	0.868394	825	3	0.88351	0.88311	0.999997	16694	0
CIRH1A	4	0.013873	0.038133	0.868394	826	2	0.63865	0.63846	0.999997	12074	0
C6orf106	4	0.013874	0.038135	0.868394	827	3	0.87512	0.87474	0.999997	16531	0
MORN1	4	0.013904	0.038197	0.868394	828	3	0.85861	0.85836	0.999997	16225	0
FMNL3	4	0.01391	0.038213	0.868394	829	3	0.99382	0.99385	0.999997	18918	0
GINM1	4	0.013924	0.038247	0.868394	830	2	0.80343	0.80338	0.999997	15143	0
MPHOSPH6	4	0.01393	0.038264	0.868394	831	3	0.95459	0.95441	0.999997	18076	0
C17orf89	4	0.013976	0.038356	0.868394	832	2	0.44734	0.45364	0.999997	8589	1
ADSL	4	0.013976	0.038356	0.868394	833	3	0.86905	0.86872	0.999997	16423	0
ITGA3	4	0.013996	0.038404	0.868394	834	3	0.9501	0.94991	0.999997	17997	0
ACTR1A	4	0.014028	0.038471	0.868394	835	2	0.94945	0.94925	0.999997	17979	0
HIST1H2BI	4	0.01405	0.038517	0.868394	836	2	0.9447	0.94446	0.999997	17877	0
MX2	4	0.014057	0.038536	0.868394	837	3	0.99533	0.99536	0.999997	18968	0
FZD2	4	0.014069	0.038561	0.868394	838	3	0.84017	0.83983	0.999997	15872	0
ZC3H15	4	0.014089	0.038604	0.868394	839	3	0.72176	0.72168	0.999997	13618	0
PCDHGC5	4	0.0141	0.038627	0.868394	840	2	0.85185	0.85158	0.999997	16101	0
GPR89B	4	0.014132	0.038701	0.868394	841	2	0.89157	0.89117	0.999997	16859	0
HYOU1	4	0.014163	0.038779	0.868394	842	3	0.97145	0.97135	0.999997	18401	0
EXOC6B	4	0.014183	0.03882	0.868394	843	1	0.3489	0.37328	0.999997	7060	1
F2RL1	4	0.014192	0.038837	0.868394	844	3	0.84665	0.84638	0.999997	15995	0
EEF1G	4	0.014207	0.038869	0.868394	845	3	0.67782	0.6775	0.999997	12791	0
ZFAT	4	0.014235	0.038934	0.868394	846	1	0.60249	0.60226	0.999997	11388	0
TPX2	4	0.014235	0.038934	0.868394	847	3	0.98485	0.98494	0.999997	18701	0
ST6GAL2	4	0.014246	0.038962	0.868394	848	3	0.98888	0.98894	0.999997	18791	0
AURKC	4	0.014287	0.039053	0.868394	849	1	0.83128	0.83101	0.999997	15693	0
TCEB2	4	0.014328	0.039155	0.868394	850	3	0.65299	0.65268	0.999997	12323	0
SLC9A6	4	0.014335	0.039168	0.868394	851	2	0.5427	0.54234	0.999997	10276	0
FRMD4B	4	0.014339	0.039172	0.868394	852	1	0.91159	0.9112	0.999997	17248	0
MKX	4	0.01436	0.039223	0.868394	853	3	0.75113	0.75099	0.999997	14163	0
TCP10	4	0.014371	0.03925	0.868394	854	2	0.86798	0.86768	0.999997	16399	0
HSBP1L1	4	0.014377	0.039265	0.868394	855	3	0.88301	0.88262	0.999997	16680	0
NOC4L	4	0.014391	0.039288	0.868394	856	3	0.99147	0.99148	0.999997	18853	0
RBM17	4	0.014394	0.039293	0.868394	857	3	0.97203	0.97195	0.999997	18408	0
DDX23	4	0.014441	0.039398	0.868394	858	3	0.99328	0.99329	0.999997	18906	0
NIN	4	0.014442	0.039399	0.868394	859	2	0.44519	0.45175	0.999997	8548	1
OR2F2	4	0.014489	0.039506	0.868394	860	3	0.97154	0.97144	0.999997	18404	0
LINGO4	4	0.014494	0.039516	0.868394	861	1	0.71771	0.71764	0.999997	13551	0
SRRM3	4	0.01455	0.039651	0.868394	862	3	0.80633	0.80631	0.999997	15211	0
CCDC134	4	0.014597	0.039757	0.868394	863	3	0.98833	0.9884	0.999997	18776	0
LETM2	4	0.014649	0.039866	0.868394	864	1	0.6858	0.68548	0.999997	12949	0
DSCC1	4	0.014673	0.039924	0.868394	865	2	0.87175	0.87136	0.999997	16472	0
PPAN	4	0.014693	0.039966	0.868394	866	3	0.99469	0.99474	0.999997	18949	0
PPP2R5B	4	0.014701	0.039981	0.868394	867	1	0.024137	0.056084	0.952239	1121	1
GGT1	4	0.014703	0.039989	0.868394	868	3	0.98887	0.98893	0.999997	18790	0
PRR5-ARHGAP8	4	0.014713	0.040008	0.868394	869	3	0.19441	0.26395	0.997942	5040	1
RACGAP1	4	0.014739	0.040066	0.868394	870	2	0.17433	0.25083	0.997899	4803	1
DUT	4	0.014744	0.040081	0.868394	871	3	0.96037	0.96023	0.999997	18194	0
CDC16	4	0.014753	0.040098	0.868394	872	1	0.71271	0.71255	0.999997	13456	0
SHCBP1L	4	0.014782	0.040148	0.868394	873	2	0.2089	0.27341	0.999047	5231	1
KLF1	4	0.014792	0.040167	0.868394	874	3	0.99136	0.99136	0.999997	18848	0
LRRC52	4	0.014804	0.040196	0.868394	875	3	0.79024	0.79028	0.999997	14889	0
CDH24	4	0.014811	0.040212	0.868394	876	2	0.33652	0.36375	0.999997	6890	1
PDLIM5	4	0.014819	0.040222	0.868394	877	2	0.62321	0.62303	0.999997	11788	0
EPS8L1	4	0.014833	0.04026	0.868394	878	2	0.87216	0.87177	0.999997	16482	0
DNPEP	4	0.014854	0.040308	0.868394	879	3	0.93352	0.93341	0.999997	17696	0
CBS	4	0.014855	0.040312	0.868394	880	3	0.69582	0.69551	0.999997	13155	0
FAM109A	4	0.014856	0.040313	0.868394	881	1	0.038443	0.07739	0.973615	1514	1
CHAT	4	0.014868	0.04034	0.868394	882	3	0.6376	0.63741	0.999997	12050	0
KCNV2	4	0.014908	0.040441	0.868394	883	3	0.89079	0.89038	0.999997	16844	0
ITIH4	4	0.01492	0.040463	0.868394	884	2	0.75101	0.75085	0.999997	14161	0
PPP4C	4	0.01496	0.040552	0.868394	885	1	0.98893	0.98899	0.999997	18793	0
C19orf33	4	0.015011	0.04066	0.868394	886	2	0.7393	0.73909	0.999997	13946	0
SPAG9	4	0.01503	0.040711	0.868394	887	3	0.76669	0.76652	0.999997	14459	0
C15orf32	4	0.015033	0.040718	0.868394	888	3	0.32829	0.35756	0.999997	6776	1
ALMS1	4	0.015063	0.040786	0.868394	889	2	0.81788	0.81779	0.999997	15436	0
SLC26A7	4	0.015068	0.040799	0.868394	890	3	0.98989	0.98994	0.999997	18815	0
CCDC174	4	0.015074	0.040814	0.868394	891	2	0.14606	0.2321	0.996358	4450	2
WBP5	4	0.015081	0.040829	0.868394	892	2	0.78992	0.78995	0.999997	14881	0
PAXBP1	4	0.015086	0.040837	0.868394	893	3	0.93075	0.93064	0.999997	17593	0
RBM10	4	0.015092	0.040857	0.868394	894	3	0.76985	0.76973	0.999997	14525	0
GOLGA6L6	4	0.015103	0.040881	0.868394	895	3	0.59175	0.5915	0.999997	11194	0
NUP214	4	0.015113	0.040904	0.868394	896	3	0.60666	0.60647	0.999997	11475	0
MAZ	4	0.015115	0.040906	0.868394	897	1	0.44307	0.4499	0.999997	8512	1
CDC123	4	0.01512	0.040928	0.868394	898	3	0.62482	0.6246	0.999997	11817	0
SNAP23	4	0.015167	0.041038	0.868394	899	2	0.5688	0.56853	0.999997	10763	0
SMN2	4	0.0152	0.041112	0.868394	900	3	0.81336	0.81327	0.999997	15356	0
ENTPD7	4	0.015218	0.041149	0.868394	901	2	0.27794	0.32072	0.999997	6106	1
LMBRD2	4	0.015265	0.041254	0.868394	902	2	0.88552	0.88508	0.999997	16724	0
FGF10	4	0.015322	0.041385	0.868394	903	2	0.11171	0.18332	0.994438	3519	1
PIH1D2	4	0.015326	0.041393	0.868394	904	3	0.95807	0.9579	0.999997	18139	0
STRC	4	0.015346	0.041433	0.868394	905	2	0.81552	0.81547	0.999997	15389	0
PPP1R8	4	0.015354	0.041452	0.868394	906	3	0.99226	0.99226	0.999997	18876	0
OR1L1	4	0.015373	0.041503	0.868394	907	1	0.052843	0.09857	0.974723	1929	1
ZNF587B	4	0.0154	0.041572	0.868394	908	3	0.52039	0.52061	0.999997	9864	1
PDCD11	4	0.01542	0.041611	0.868394	909	2	0.63566	0.6355	0.999997	12014	0
RPL27	4	0.015421	0.041614	0.868394	910	3	0.93352	0.93341	0.999997	17692	0
GRAMD2	4	0.015425	0.041628	0.868394	911	3	0.95471	0.95453	0.999997	18081	0
PSMD7	4	0.015435	0.041653	0.868394	912	3	0.98467	0.98474	0.999997	18694	0
OSBP	4	0.015439	0.041663	0.868394	913	3	0.3386	0.36533	0.999997	6919	1
SCN3B	4	0.015477	0.041738	0.868394	914	1	0.097499	0.16298	0.988199	3150	1
CASP4	4	0.015488	0.041761	0.868394	915	3	0.092108	0.15531	0.988199	2996	1
NDUFA11	4	0.015554	0.04192	0.868394	916	3	0.58103	0.58075	0.999997	10995	0
GBP2	4	0.015561	0.041939	0.868394	917	2	0.75371	0.75354	0.999997	14210	0
HAUS8	4	0.015576	0.041971	0.868394	918	3	0.0035796	0.01038	0.89884	208	1
LPIN1	4	0.015587	0.041999	0.868394	919	3	0.9653	0.96518	0.999997	18281	0
DST	4	0.015598	0.042028	0.868394	920	2	0.77807	0.77802	0.999997	14664	0
RUVBL1	4	0.015605	0.04204	0.868394	921	3	0.38343	0.40039	0.999997	7575	1
HBG1	4	0.015632	0.042099	0.868394	922	2	0.26398	0.31092	0.999997	5928	1
PATE1	4	0.015643	0.042124	0.868394	923	2	0.083463	0.14295	0.988199	2754	2
OR4D9	4	0.015655	0.042149	0.868394	924	3	0.78501	0.78502	0.999997	14783	0
UFL1	4	0.015665	0.042172	0.868394	925	2	0.86842	0.86809	0.999997	16408	0
RIIAD1	4	0.015684	0.042214	0.868394	926	2	0.97294	0.97289	0.999997	18432	0
NRG2	4	0.015723	0.042304	0.868394	927	3	0.99164	0.99166	0.999997	18857	0
FARSB	4	0.015732	0.042326	0.868394	928	2	0.87604	0.87566	0.999997	16548	0
BCL11A	4	0.015762	0.042393	0.868394	929	3	0.97989	0.97989	0.999997	18570	0
ZNF474	4	0.015777	0.04243	0.868394	930	2	0.42126	0.43143	0.999997	8172	1
ZNF280B	4	0.015787	0.042451	0.868394	931	2	0.56902	0.56876	0.999997	10770	0
PPP1R15B	4	0.0158	0.042477	0.868394	932	2	0.91483	0.91445	0.999997	17306	0
CTSV	4	0.015839	0.042562	0.868394	933	1	0.38524	0.4018	0.999997	7607	1
HSPA6	4	0.015844	0.042579	0.868394	934	3	0.96546	0.96534	0.999997	18285	0
MDM2	4	0.015851	0.042597	0.868394	935	3	0.88644	0.88599	0.999997	16749	0
SMG5	4	0.015852	0.042599	0.868394	936	2	0.84925	0.84898	0.999997	16051	0
FGF16	4	0.015882	0.04267	0.868394	937	2	0.091914	0.15504	0.988199	2993	1
NEK2	4	0.015884	0.042674	0.868394	938	3	0.77975	0.77974	0.999997	14690	0
CIT	4	0.01592	0.042765	0.868394	939	3	0.31798	0.34988	0.999997	6652	1
EMD	4	0.015942	0.042817	0.868394	940	3	0.28569	0.32634	0.999997	6217	1
GPR45	4	0.015957	0.042859	0.868394	941	2	0.090257	0.15273	0.988199	2946	2
PABPC1	4	0.015965	0.042873	0.868394	942	3	0.89241	0.89199	0.999997	16874	0
PET117	4	0.015977	0.042903	0.868394	943	3	0.99063	0.99066	0.999997	18825	0
COA5	4	0.015994	0.042934	0.868394	944	2	0.7251	0.72497	0.999997	13682	0
GBE1	4	0.016046	0.043041	0.868394	945	2	0.89653	0.89612	0.999997	16954	0
TNFRSF10A	4	0.016055	0.043062	0.868394	946	2	0.642	0.64173	0.999997	12136	0
KBTBD6	4	0.016067	0.043086	0.868394	947	3	0.8482	0.84791	0.999997	16030	0
RPL37A	4	0.016078	0.043108	0.868394	948	2	0.30254	0.33863	0.999997	6437	1
CITED1	4	0.016097	0.043151	0.868394	949	2	0.2997	0.33653	0.999997	6401	1
PLK4	4	0.016121	0.043217	0.868394	950	3	0.79822	0.79822	0.999997	15032	0
PPHLN1	4	0.016125	0.043226	0.868394	951	3	0.96782	0.96769	0.999997	18330	0
LOC100130880	4	0.016149	0.043289	0.868394	952	2	0.90511	0.90463	0.999997	17128	0
SPTAN1	4	0.016154	0.043297	0.868394	953	3	0.99518	0.99521	0.999997	18964	0
RPS6KA1	4	0.016179	0.043348	0.868501	954	3	0.9948	0.99485	0.999997	18954	0
AGAP11	4	0.016205	0.043406	0.868752	955	3	0.96694	0.96682	0.999997	18316	0
CYP4X1	4	0.016252	0.043496	0.869646	956	2	0.61086	0.61064	0.999997	11565	0
KCNC4	4	0.016304	0.04361	0.870911	957	2	0.95658	0.95642	0.999997	18120	0
IL12RB1	4	0.016356	0.04372	0.870911	958	2	0.71883	0.71876	0.999997	13572	0
TMEM178A	4	0.016358	0.043727	0.870911	959	2	0.72753	0.72742	0.999997	13727	0
FOXO3	4	0.016387	0.043797	0.870911	960	3	0.8948	0.89437	0.999997	16911	0
PCIF1	4	0.016404	0.043823	0.870911	961	2	0.59881	0.59857	0.999997	11319	0
SIRT7	4	0.016408	0.043833	0.870911	962	2	0.6718	0.67152	0.999997	12681	0
RAB3GAP1	4	0.016435	0.043896	0.871261	963	3	0.58323	0.58297	0.999997	11039	0
ARHGAP11B	4	0.016464	0.043962	0.871488	964	3	0.97405	0.97401	0.999997	18464	0
C1orf56	4	0.016511	0.044069	0.871488	965	2	0.13026	0.2097	0.996358	4019	2
TUFM	4	0.016582	0.044219	0.871488	966	3	0.90272	0.90228	0.999997	17082	0
GPR55	4	0.016614	0.044288	0.871488	967	1	0.088878	0.15072	0.988199	2900	2
TAZ	4	0.016625	0.044313	0.871488	968	2	0.94633	0.9461	0.999997	17912	0
NACC1	4	0.016645	0.044363	0.871488	969	3	0.92152	0.92122	0.999997	17423	0
C3orf67	4	0.016682	0.044448	0.871488	970	3	0.87893	0.8785	0.999997	16609	0
PDE4D	4	0.016693	0.044476	0.871488	971	3	0.079486	0.13732	0.987202	2657	1
ENDOU	4	0.016718	0.04453	0.871488	972	2	0.5286	0.52848	0.999997	10023	1
FAM98B	4	0.016725	0.04455	0.871488	973	3	0.83727	0.83694	0.999997	15811	0
SLC25A42	4	0.016726	0.044553	0.871488	974	3	0.33054	0.35923	0.999997	6802	1
LOC645382	4	0.016764	0.044644	0.871488	975	2	0.22103	0.2815	0.999997	5376	1
RPL17	4	0.016767	0.044651	0.871488	976	3	0.96454	0.96441	0.999997	18267	0
LGALS13	4	0.016769	0.044656	0.871488	977	2	0.72132	0.72123	0.999997	13613	0
AFG3L2	4	0.016771	0.044659	0.871488	978	3	0.62782	0.62758	0.999997	11873	0
SLC6A16	4	0.016778	0.044677	0.871488	979	3	0.32619	0.356	0.999997	6748	1
MAPK14	4	0.016797	0.044718	0.871488	980	3	0.95453	0.95436	0.999997	18075	0
CCDC183	4	0.016841	0.044823	0.871488	981	3	0.46654	0.4704	0.999997	8900	1
SMARCC2	4	0.01686	0.044864	0.871488	982	3	0.91947	0.91914	0.999997	17387	0
ALOX5AP	4	0.016873	0.044902	0.871488	983	1	0.038762	0.077864	0.973615	1526	2
TSPY8	4	0.016897	0.044948	0.871488	984	3	0.58952	0.58926	0.999997	11155	0
ENTPD2	4	0.016924	0.045011	0.871488	985	3	0.64093	0.64071	0.999997	12114	0
SPTBN5	4	0.016941	0.045058	0.871488	986	2	0.4205	0.43078	0.999997	8158	1
B3GALNT1	4	0.016976	0.045137	0.871488	987	1	0.58548	0.58527	0.999997	11080	0
ASNSD1	4	0.016987	0.045169	0.871488	988	2	0.046921	0.090003	0.973615	1760	2
COQ2	4	0.016995	0.045185	0.871488	989	2	0.88888	0.88844	0.999997	16803	0
CGB2	4	0.017018	0.045233	0.871488	990	3	0.97221	0.97215	0.999997	18414	0
MITF	4	0.017028	0.045257	0.871488	991	1	0.31278	0.346	0.999997	6576	1
GJB2	4	0.017054	0.045309	0.871488	992	3	0.74273	0.7425	0.999997	14005	0
ZASP	4	0.017058	0.045319	0.871488	993	3	0.86428	0.864	0.999997	16319	0
RHBDL3	4	0.017079	0.045365	0.871488	994	2	0.59757	0.59728	0.999997	11293	0
SLC51B	4	0.017119	0.045436	0.871488	995	2	0.073175	0.12821	0.987051	2473	1
ORC3	4	0.017126	0.045447	0.871488	996	3	0.98032	0.98031	0.999997	18582	0
RBM48	4	0.017131	0.045458	0.871488	997	2	0.29141	0.33054	0.999997	6295	1
PCYT1A	4	0.01719	0.045593	0.871488	998	3	0.90686	0.90638	0.999997	17158	0
ADGRG1	4	0.017213	0.04564	0.871488	999	2	0.47871	0.48147	0.999997	9094	1
SPRR2D	4	0.017234	0.04569	0.871488	1000	2	0.98423	0.98433	0.999997	18682	0
RNF17	4	0.017243	0.045714	0.871488	1001	3	0.98369	0.98377	0.999997	18661	0
RSRP1	4	0.017265	0.045764	0.871488	1002	3	0.56989	0.56963	0.999997	10788	0
PRPF6	4	0.017286	0.045808	0.871488	1003	1	0.098378	0.16423	0.989087	3172	2
CABIN1	4	0.01729	0.045818	0.871488	1004	3	0.97424	0.9742	0.999997	18469	0
C18orf65	4	0.017314	0.045863	0.871488	1005	3	0.66467	0.66433	0.999997	12537	0
FUT10	4	0.01733	0.0459	0.871488	1006	2	0.38444	0.40118	0.999997	7595	1
FOSB	4	0.017337	0.045916	0.871488	1007	1	0.063544	0.11421	0.983329	2215	2
GPC3	4	0.017356	0.045965	0.871488	1008	3	0.77257	0.7725	0.999997	14571	0
GTF2H4	4	0.017389	0.046036	0.871488	1009	3	0.42962	0.43844	0.999997	8304	1
MIR1-1HG	4	0.017398	0.04605	0.871488	1010	3	0.9382	0.93804	0.999997	17762	0
ZNF778	4	0.017441	0.04614	0.871925	1011	2	0.77439	0.77438	0.999997	14611	0
PALM2-AKAP2	4	0.017463	0.046193	0.871925	1012	3	0.78938	0.78937	0.999997	14870	0
ATG9A	4	0.017486	0.046248	0.871925	1013	2	0.92851	0.92832	0.999997	17550	0
PHLDB2	4	0.017492	0.046263	0.871925	1014	1	0.16335	0.24374	0.997004	4666	1
PSMD8	4	0.017517	0.046323	0.871925	1015	2	0.84625	0.84593	0.999997	15987	0
COX18	4	0.017528	0.046347	0.871925	1016	3	0.93352	0.93341	0.999997	17641	0
DNAL4	4	0.017566	0.046423	0.872499	1017	3	0.34753	0.37221	0.999997	7040	1
C14orf132	4	0.017596	0.046498	0.873043	1018	2	0.67497	0.67469	0.999997	12743	0
TLN1	4	0.017669	0.046658	0.874111	1019	3	0.20336	0.26977	0.998999	5159	1
LRRC59	4	0.017691	0.046715	0.874111	1020	3	0.30986	0.34387	0.999997	6534	1
KCTD13	4	0.017699	0.046736	0.874111	1021	2	0.97308	0.97302	0.999997	18438	0
PRRT1	4	0.0177	0.046738	0.874111	1022	3	0.86712	0.86682	0.999997	16380	0
DAB2	4	0.017751	0.046857	0.874821	1023	1	0.12433	0.20128	0.99574	3860	1
SRSF1	4	0.017758	0.046867	0.874821	1024	3	0.31326	0.34634	0.999997	6581	1
DUSP6	4	0.017777	0.046914	0.874847	1025	3	0.95153	0.95137	0.999997	18022	0
UQCC2	4	0.017802	0.046968	0.874998	1026	1	0.5221	0.52225	0.999997	9901	1
PHF8	4	0.017849	0.047072	0.875443	1027	2	0.68068	0.68039	0.999997	12855	0
CHPT1	4	0.017854	0.047084	0.875443	1028	1	0.92891	0.92875	0.999997	17560	0
MOCS3	4	0.017889	0.047147	0.875494	1029	3	0.83735	0.83703	0.999997	15814	0
GOLGA6A	4	0.017928	0.04725	0.875494	1030	2	0.76461	0.76441	0.999997	14419	0
PAQR3	4	0.01796	0.047315	0.875494	1031	2	0.65617	0.65586	0.999997	12388	0
TIPIN	4	0.017978	0.047361	0.875494	1032	3	0.34723	0.37199	0.999997	7037	1
RPS15A	4	0.017991	0.047394	0.875494	1033	2	0.10893	0.17935	0.994071	3440	1
LRRC8A	4	0.018013	0.047446	0.875494	1034	3	0.52931	0.52919	0.999997	10039	1
MUC5B	4	0.018017	0.047454	0.875494	1035	3	0.26194	0.30949	0.999997	5908	1
PALB2	4	0.018036	0.04749	0.875494	1036	3	0.072731	0.12757	0.987051	2458	1
DHX33	4	0.018056	0.047539	0.875494	1037	3	0.98633	0.98642	0.999997	18738	0
SIDT1	4	0.01806	0.04755	0.875494	1038	1	0.7223	0.72223	0.999997	13631	0
ECI1	4	0.018079	0.04759	0.875494	1039	3	0.96806	0.96793	0.999997	18338	0
ALOX15B	4	0.018112	0.047662	0.875668	1040	2	0.74426	0.74399	0.999997	14035	0
DEGS2	4	0.018141	0.047726	0.875668	1041	3	0.87546	0.87509	0.999997	16540	0
ADCYAP1	4	0.018164	0.047776	0.875668	1042	1	0.19414	0.26376	0.997942	5038	1
NRP2	4	0.018167	0.047783	0.875668	1043	2	0.44495	0.45155	0.999997	8542	1
MAGEA2B	4	0.018198	0.047849	0.876043	1044	2	0.21577	0.27801	0.999997	5311	1
DDX10	4	0.018219	0.047896	0.876067	1045	3	0.78153	0.78156	0.999997	14728	0
VSX2	4	0.018239	0.047946	0.876129	1046	3	0.9647	0.96457	0.999997	18269	0
CNPY2	4	0.018267	0.048025	0.876426	1047	2	0.094837	0.15919	0.988199	3075	2
TRAPPC6B	4	0.018318	0.048126	0.876426	1048	2	0.97753	0.97742	0.999997	18528	0
PAX2	4	0.018343	0.048176	0.876426	1049	2	0.097366	0.1628	0.988199	3143	2
GLMP	4	0.018361	0.048211	0.876426	1050	3	0.16692	0.24599	0.997004	4711	1
EXTL2	4	0.01837	0.04823	0.876426	1051	1	0.030706	0.065957	0.964407	1302	2
CDC6	4	0.018391	0.048278	0.876426	1052	2	0.46211	0.46649	0.999997	8825	1
CTCF	4	0.018392	0.048283	0.876426	1053	3	0.98407	0.98417	0.999997	18672	0
ARHGEF38	4	0.018447	0.048397	0.87688	1054	3	0.94592	0.94568	0.999997	17907	0
LOC100131303	4	0.018459	0.04843	0.87688	1055	3	0.82841	0.82816	0.999997	15638	0
SLC26A3	4	0.018467	0.048445	0.87688	1056	3	0.92775	0.92756	0.999997	17533	0
RTCB	4	0.018491	0.048509	0.877202	1057	3	0.82705	0.82682	0.999997	15613	0
ZNF812	4	0.018576	0.048696	0.878769	1058	2	0.76579	0.7656	0.999997	14443	0
USP49	4	0.018616	0.048788	0.878769	1059	2	0.19756	0.26598	0.997942	5085	1
PSMB9	4	0.018625	0.048807	0.878769	1060	3	0.65358	0.65327	0.999997	12335	0
C1RL	4	0.018628	0.048816	0.878769	1061	2	0.80079	0.80074	0.999997	15094	0
ZNF620	4	0.01868	0.04893	0.878769	1062	1	0.72944	0.72933	0.999997	13760	0
NDUFS8	4	0.018689	0.048951	0.878769	1063	3	0.85722	0.857	0.999997	16198	0
RFT1	4	0.018697	0.048969	0.878769	1064	2	0.74704	0.74688	0.999997	14089	0
THNSL1	4	0.018709	0.049001	0.878769	1065	3	0.98416	0.98427	0.999997	18677	0
FBXO5	4	0.018713	0.049009	0.878769	1066	3	0.69503	0.69468	0.999997	13135	0
MTRNR2L3	4	0.018783	0.049194	0.881258	1067	1	0.2852	0.32599	0.999997	6208	1
NOC3L	4	0.018828	0.049293	0.881665	1068	3	0.99311	0.99313	0.999997	18901	0
MLLT6	4	0.018834	0.049309	0.881665	1069	1	0.062552	0.11277	0.983329	2187	1
EPB41L1	4	0.018938	0.049567	0.885449	1070	1	0.44653	0.45294	0.999997	8576	1
ATP6V1H	4	0.018972	0.049653	0.886079	1071	3	0.89539	0.89497	0.999997	16927	0
KIAA1191	4	0.018989	0.049695	0.886079	1072	1	0.020178	0.050107	0.940377	1018	2
TGFB3	4	0.019041	0.049802	0.887154	1073	2	0.605	0.60479	0.999997	11438	0
IDH3B	4	0.019136	0.050021	0.890218	1074	2	0.66492	0.66458	0.999997	12542	0
DALRD3	4	0.019195	0.050159	0.891157	1075	1	0.87633	0.87595	0.999997	16557	0
RAD50	4	0.019218	0.050214	0.891157	1076	3	0.64195	0.64169	0.999997	12135	0
KRTAP19-4	4	0.019247	0.050291	0.891157	1077	1	0.46732	0.4711	0.999997	8918	1
GSC2	4	0.019259	0.050309	0.891157	1078	2	0.48504	0.48721	0.999997	9208	1
TMEM143	4	0.019271	0.050341	0.891157	1079	3	0.99096	0.99096	0.999997	18836	0
LOC554223	4	0.019308	0.050431	0.891157	1080	3	0.99181	0.99183	0.999997	18861	0
GPR84	4	0.01934	0.050501	0.891157	1081	3	0.68079	0.68049	0.999997	12857	0
XRCC3	4	0.01935	0.050528	0.891157	1082	1	0.80667	0.80665	0.999997	15219	0
CATSPER3	4	0.019365	0.050562	0.891157	1083	2	0.44971	0.45568	0.999997	8620	1
HOXA9	4	0.019368	0.05057	0.891157	1084	3	0.13334	0.21408	0.996358	4093	1
SLC37A3	4	0.01939	0.050619	0.891157	1085	3	0.46004	0.46467	0.999997	8792	1
FAM131C	4	0.019402	0.050646	0.891157	1086	3	0.96604	0.96589	0.999997	18293	0
ADRA2C	4	0.019417	0.05068	0.891157	1087	3	0.97925	0.97922	0.999997	18558	0
YRDC	4	0.019482	0.050815	0.891381	1088	3	0.70698	0.70671	0.999997	13345	0
FBXL15	4	0.019505	0.050868	0.891381	1089	1	0.13273	0.21322	0.996358	4080	1
MINA	4	0.019522	0.050898	0.891381	1090	2	0.0019513	0.0060903	0.861422	134	2
FCGR2B	4	0.019563	0.050993	0.891381	1091	2	0.94515	0.94491	0.999997	17887	0
NDUFC1	4	0.019572	0.051016	0.891381	1092	3	0.18596	0.25839	0.997942	4932	1
GADD45G	4	0.019596	0.051068	0.891381	1093	3	0.86722	0.86693	0.999997	16384	0
RASA4B	4	0.019604	0.051084	0.891381	1094	2	0.9384	0.93824	0.999997	17767	0
FNTA	4	0.019609	0.051096	0.891381	1095	3	0.99443	0.99447	0.999997	18940	0
CCT6B	4	0.019654	0.051184	0.891381	1096	2	0.82013	0.82001	0.999997	15481	0
RNF34	4	0.01966	0.051198	0.891381	1097	2	0.7059	0.70563	0.999997	13326	0
CYP4B1	4	0.019695	0.051271	0.891381	1098	2	0.73734	0.73714	0.999997	13903	0
FZD10	4	0.019711	0.051309	0.891381	1099	1	0.49383	0.49527	0.999997	9376	1
PARD6G	4	0.019745	0.05138	0.891381	1100	2	0.74245	0.74219	0.999997	13997	0
RHPN1	4	0.019752	0.051398	0.891381	1101	3	0.80522	0.80519	0.999997	15190	0
PDSS2	4	0.019763	0.051417	0.891381	1102	2	0.76519	0.76499	0.999997	14431	0
C4orf22	4	0.01977	0.051438	0.891381	1103	2	0.78599	0.786	0.999997	14805	0
CACNB2	4	0.019795	0.051499	0.89156	1104	2	0.45514	0.46038	0.999997	8699	1
PDYN	4	0.019814	0.051542	0.89156	1105	1	0.78875	0.78871	0.999997	14863	0
TDRD9	4	0.019836	0.051591	0.891604	1106	2	0.40573	0.41852	0.999997	7935	1
NARFL	4	0.019866	0.051663	0.891941	1107	2	0.73194	0.73177	0.999997	13802	0
VAMP7	4	0.019901	0.051752	0.891941	1108	3	0.87767	0.8772	0.999997	16586	0
RDH11	4	0.019917	0.051783	0.891941	1109	3	0.92054	0.92021	0.999997	17408	0
RBMS2	4	0.019926	0.051797	0.891941	1110	3	0.76704	0.76687	0.999997	14466	0
TMCO4	4	0.020003	0.051975	0.893237	1111	2	0.77827	0.77823	0.999997	14667	0
C2orf48	4	0.020009	0.051988	0.893237	1112	3	0.94032	0.94015	0.999997	17807	0
FPR1	4	0.020017	0.052013	0.893237	1113	3	0.99189	0.9919	0.999997	18867	0
DNAJC12	4	0.020078	0.052144	0.894693	1114	2	0.53954	0.53913	0.999997	10222	1
OR7E24	4	0.020123	0.052246	0.89564	1115	2	0.67456	0.67428	0.999997	12734	0
RNF41	4	0.02017	0.052362	0.895849	1116	3	0.97234	0.97229	0.999997	18417	0
SYNJ1	4	0.020175	0.052376	0.895849	1117	2	0.96981	0.96968	0.999997	18370	0
RAB26	4	0.020187	0.052399	0.895849	1118	3	0.8957	0.89528	0.999997	16934	0
KRTAP10-11	4	0.020229	0.052499	0.896168	1119	3	0.29254	0.33137	0.999997	6314	1
UTP20	4	0.020237	0.052512	0.896168	1120	3	0.91926	0.91893	0.999997	17384	0
PCSK4	4	0.020278	0.052609	0.89702	1121	1	0.001014	0.0036765	0.769456	89	2
RBKS	4	0.020351	0.052748	0.897661	1122	3	0.064097	0.11502	0.983329	2231	1
HNRNPA1	4	0.020355	0.052759	0.897661	1123	2	0.15624	0.23916	0.997004	4582	1
TXLNA	4	0.020381	0.052809	0.897661	1124	1	0.95605	0.95585	0.999997	18109	0
HERC2	4	0.020433	0.05292	0.897661	1125	1	0.67695	0.67664	0.999997	12777	0
HARS2	4	0.020484	0.053036	0.897661	1126	1	0.88414	0.88369	0.999997	16701	0
EIF2AK1	4	0.020489	0.053048	0.897661	1127	3	0.8427	0.84236	0.999997	15921	0
GATC	4	0.020506	0.05309	0.897661	1128	2	0.71115	0.71094	0.999997	13425	0
MC1R	4	0.020515	0.053105	0.897661	1129	2	0.98556	0.98563	0.999997	18713	0
RHD	4	0.020536	0.053159	0.897661	1130	3	0.93196	0.93183	0.999997	17614	0
CDKN2B	4	0.02054	0.053168	0.897661	1131	2	0.62805	0.62782	0.999997	11879	0
MIS12	4	0.020603	0.053308	0.897661	1132	3	0.99526	0.99528	0.999997	18967	0
POLR1B	4	0.020633	0.05338	0.897661	1133	3	0.93352	0.93341	0.999997	17646	0
PTGER3	4	0.020641	0.0534	0.897661	1134	2	0.63411	0.63392	0.999997	11987	0
B4GALT6	4	0.02069	0.053507	0.897661	1135	1	0.11827	0.19266	0.995164	3693	2
TNC	4	0.020734	0.053608	0.897661	1136	2	0.81739	0.81731	0.999997	15429	0
TEKT4	4	0.020742	0.053623	0.897661	1137	1	0.15471	0.23818	0.997004	4563	1
CTNS	4	0.020785	0.053727	0.897661	1138	3	0.16874	0.24721	0.997004	4736	1
RABGGTA	4	0.020793	0.053747	0.897661	1139	2	0.18412	0.2572	0.997942	4915	1
TRIM41	4	0.020866	0.053907	0.897661	1140	3	0.92278	0.92252	0.999997	17442	0
TAF8	4	0.020887	0.05396	0.897661	1141	3	0.24995	0.30123	0.999997	5733	1
PLXNB2	4	0.020896	0.053977	0.897661	1142	3	0.92089	0.92058	0.999997	17415	0
CXCL14	4	0.020913	0.054012	0.897661	1143	2	0.46119	0.4657	0.999997	8808	1
CCT3	4	0.02093	0.054059	0.897661	1144	2	0.9803	0.98029	0.999997	18581	0
USP8	4	0.020948	0.0541	0.897661	1145	1	0.30787	0.34245	0.999997	6514	1
TOMM70A	4	0.021051	0.054351	0.897661	1146	1	0.46346	0.46771	0.999997	8850	1
ZBTB24	4	0.021075	0.054404	0.897661	1147	2	0.23931	0.2939	0.999997	5605	1
NRTN	4	0.021102	0.054459	0.897661	1148	1	0.52366	0.52375	0.999997	9926	1
NBPF7	4	0.021123	0.054503	0.897661	1149	3	0.82888	0.82861	0.999997	15646	0
BFAR	4	0.021154	0.054581	0.897661	1150	2	0.44821	0.45441	0.999997	8601	1
NOP16	4	0.021205	0.05469	0.897661	1151	1	0.84979	0.84956	0.999997	16062	0
TMTC1	4	0.021212	0.054702	0.897661	1152	3	0.84935	0.84908	0.999997	16054	0
RANBP17	4	0.02123	0.054742	0.897661	1153	3	0.85437	0.85409	0.999997	16145	0
ARPC2	4	0.021239	0.05476	0.897661	1154	3	0.99388	0.99392	0.999997	18920	0
KRT25	4	0.021263	0.054814	0.897661	1155	2	0.85179	0.85153	0.999997	16099	0
TNFAIP8L2-SCNM1	4	0.02128	0.054857	0.897661	1156	2	0.65645	0.65613	0.999997	12393	0
BET1	4	0.021282	0.054861	0.897661	1157	3	0.97683	0.97671	0.999997	18513	0
DHODH	4	0.021291	0.054877	0.897661	1158	3	0.92025	0.91993	0.999997	17402	0
USP12	4	0.021299	0.054891	0.897661	1159	3	0.99183	0.99184	0.999997	18863	0
EIF3I	4	0.021304	0.054904	0.897661	1160	3	0.58726	0.58706	0.999997	11111	0
ACADM	4	0.021308	0.054916	0.897661	1161	1	0.25303	0.30328	0.999997	5780	1
CANX	4	0.021312	0.054926	0.897661	1162	3	0.5546	0.55425	0.999997	10504	0
SLC6A19	4	0.02136	0.055035	0.897661	1163	1	0.19529	0.26453	0.997942	5054	1
CNTN3	4	0.021411	0.05514	0.897661	1164	2	0.97544	0.97535	0.999997	18488	0
COPE	4	0.021442	0.055209	0.897661	1165	3	0.98305	0.98312	0.999997	18640	0
WDR18	4	0.021443	0.055212	0.897661	1166	2	0.94237	0.94214	0.999997	17838	0
USE1	4	0.021452	0.055229	0.897661	1167	2	0.91149	0.91111	0.999997	17246	0
MYLK2	4	0.021459	0.055247	0.897661	1168	3	0.73342	0.73323	0.999997	13832	0
NUTM2A	4	0.021461	0.055251	0.897661	1169	2	0.39082	0.40636	0.999997	7692	1
RBM39	4	0.021463	0.055253	0.897661	1170	2	0.61039	0.6102	0.999997	11553	0
RHBDF1	4	0.021481	0.055301	0.897661	1171	3	0.45524	0.46046	0.999997	8701	1
STK17B	4	0.021514	0.055379	0.897661	1172	1	0.047809	0.091274	0.974103	1791	1
HEATR3	4	0.021538	0.055444	0.897661	1173	2	0.55153	0.55116	0.999997	10443	0
MTMR4	4	0.02155	0.055467	0.897661	1174	3	0.29857	0.33571	0.999997	6388	1
CREB3L2	4	0.021566	0.055503	0.897661	1175	2	0.52851	0.52839	0.999997	10021	1
DNM1L	4	0.021568	0.055506	0.897661	1176	3	0.97622	0.97613	0.999997	18502	0
RGPD5	4	0.021599	0.055562	0.897661	1177	2	0.98479	0.98486	0.999997	18697	0
PRR16	4	0.021607	0.055583	0.897661	1178	2	0.46699	0.47079	0.999997	8911	1
CEND1	4	0.021617	0.055601	0.897661	1179	3	0.92585	0.92561	0.999997	17492	0
GPD1	4	0.021633	0.055635	0.897661	1180	2	0.94868	0.94849	0.999997	17956	0
PROX2	4	0.02165	0.055675	0.897661	1181	2	0.19249	0.2627	0.997942	5016	1
ZNF549	4	0.021669	0.055714	0.897661	1182	3	0.99486	0.99491	0.999997	18956	0
DGCR8	4	0.021676	0.055724	0.897661	1183	2	0.97908	0.97905	0.999997	18553	0
CMPK2	4	0.021681	0.055733	0.897661	1184	3	0.7536	0.75343	0.999997	14207	0
RNF13	4	0.021685	0.055744	0.897661	1185	2	0.36966	0.38944	0.999997	7371	1
KRTAP5-9	4	0.021685	0.055744	0.897661	1186	3	0.95834	0.95815	0.999997	18150	0
RNASEH1	4	0.02172	0.055821	0.897661	1187	2	0.82147	0.82135	0.999997	15503	0
PIGM	4	0.02172	0.055821	0.897661	1188	3	0.93123	0.93114	0.999997	17606	0
CCDC61	4	0.021738	0.055856	0.897661	1189	3	0.97779	0.97766	0.999997	18534	0
ZNF99	4	0.02176	0.055914	0.897661	1190	3	0.9028	0.90235	0.999997	17084	0
SNX32	4	0.021798	0.055998	0.897661	1191	3	0.98327	0.98334	0.999997	18647	0
ETV4	4	0.021806	0.056016	0.897661	1192	2	0.69047	0.69015	0.999997	13047	0
FOXL1	4	0.021823	0.056052	0.897661	1193	1	0.5731	0.57291	0.999997	10850	0
SKP2	4	0.021832	0.056074	0.897661	1194	2	0.50463	0.50551	0.999997	9567	1
PGC	4	0.021874	0.056168	0.898401	1195	1	0.0075482	0.020404	0.902628	420	3
RAD9A	4	0.021939	0.056327	0.900191	1196	3	0.44485	0.45146	0.999997	8539	1
HOXB9	4	0.021977	0.056421	0.9003	1197	2	0.95806	0.95789	0.999997	18138	0
NKX1-2	4	0.022006	0.056476	0.9003	1198	2	0.060157	0.10931	0.982247	2121	1
COA6	4	0.022029	0.056532	0.9003	1199	1	0.78268	0.78276	0.999997	14741	0
ATP5I	4	0.022071	0.05663	0.9003	1200	3	0.0016996	0.005491	0.860372	121	1
ICAM1	4	0.022124	0.05675	0.9003	1201	3	0.75852	0.75836	0.999997	14306	0
PRSS21	4	0.022142	0.056792	0.9003	1202	3	0.33139	0.35987	0.999997	6814	1
MS4A6E	4	0.022183	0.056885	0.9003	1203	1	0.090452	0.153	0.988199	2952	1
CAB39L	4	0.022224	0.056976	0.9003	1204	2	0.98641	0.9865	0.999997	18739	0
MAFA	4	0.022235	0.056998	0.9003	1205	1	0.46591	0.46985	0.999997	8891	1
NPIPB5	4	0.022259	0.057056	0.9003	1206	2	0.97867	0.97861	0.999997	18544	0
SATB2	4	0.022284	0.057111	0.9003	1207	3	0.77588	0.77584	0.999997	14628	0
HSPB9	4	0.022286	0.057115	0.9003	1208	3	0.25496	0.30462	0.999997	5809	1
MRPL12	4	0.02233	0.057224	0.9003	1209	2	0.90087	0.90045	0.999997	17049	0
SDHAF1	4	0.022338	0.05724	0.9003	1210	1	0.23577	0.29143	0.999997	5558	1
POLR1A	4	0.022347	0.057263	0.9003	1211	3	0.99426	0.99429	0.999997	18932	0
PHF20	4	0.022359	0.057296	0.9003	1212	3	0.95534	0.95515	0.999997	18098	0
PERM1	4	0.022389	0.057364	0.9003	1213	1	0.015477	0.039718	0.92602	819	1
LMF1	4	0.022417	0.057427	0.9003	1214	2	0.8523	0.85203	0.999997	16107	0
CSAD	4	0.02244	0.057477	0.9003	1215	2	0.85902	0.85878	0.999997	16231	0
NEURL1	4	0.022461	0.057523	0.9003	1216	2	0.85766	0.85744	0.999997	16203	0
GPR83	4	0.022462	0.057525	0.9003	1217	3	0.98344	0.98351	0.999997	18651	0
CTAGE4	4	0.022492	0.057586	0.9003	1218	1	0.2589	0.30737	0.999997	5863	1
ZNF148	4	0.022514	0.05764	0.9003	1219	3	0.99432	0.99435	0.999997	18935	0
B4GALNT2	4	0.022543	0.057702	0.9003	1220	2	0.69335	0.69299	0.999997	13103	0
ZNF675	4	0.022593	0.05782	0.9003	1221	2	0.32502	0.35513	0.999997	6736	1
SPRR4	4	0.022618	0.057877	0.9003	1222	3	0.90735	0.90689	0.999997	17171	0
DUSP7	4	0.022646	0.05794	0.9003	1223	2	0.88118	0.88077	0.999997	16648	0
TPRG1L	4	0.022654	0.057955	0.9003	1224	3	0.78744	0.78743	0.999997	14838	0
PIM1	4	0.022681	0.058013	0.9003	1225	2	0.95614	0.95595	0.999997	18112	0
RAF1	4	0.022698	0.058049	0.9003	1226	1	0.15338	0.23733	0.997004	4546	1
UBL4B	4	0.022735	0.058136	0.9003	1227	3	0.96342	0.9633	0.999997	18249	0
ZNF766	4	0.022749	0.058167	0.9003	1228	2	0.93794	0.93776	0.999997	17752	0
IFT140	4	0.022788	0.058241	0.9003	1229	2	0.61189	0.61168	0.999997	11583	0
HCST	4	0.022801	0.058267	0.9003	1230	1	0.13641	0.21848	0.996358	4181	2
HAVCR1	4	0.022807	0.058285	0.9003	1231	3	0.59271	0.59251	0.999997	11207	0
EMC7	4	0.022832	0.058338	0.9003	1232	3	0.98344	0.98351	0.999997	18650	0
PLA2G4F	4	0.022852	0.05837	0.9003	1233	2	0.98657	0.98666	0.999997	18742	0
TRIB2	4	0.022858	0.058385	0.9003	1234	2	0.51779	0.51817	0.999997	9816	1
FLG2	4	0.022865	0.058405	0.9003	1235	3	0.82228	0.82214	0.999997	15514	0
GRWD1	4	0.022879	0.058431	0.9003	1236	3	0.98062	0.98064	0.999997	18589	0
DZIP1L	4	0.022883	0.058442	0.9003	1237	3	0.51912	0.51944	0.999997	9837	1
HIST1H2BM	4	0.022903	0.058487	0.9003	1238	2	0.39968	0.41356	0.999997	7838	1
SLC8B1	4	0.022912	0.058506	0.9003	1239	2	0.072236	0.12684	0.987051	2443	2
NCOA6	4	0.022929	0.058535	0.9003	1240	2	0.11934	0.19419	0.995199	3729	2
DAD1	4	0.022955	0.058581	0.9003	1241	3	0.96941	0.96928	0.999997	18364	0
SNW1	4	0.022956	0.058582	0.9003	1242	3	0.49593	0.49724	0.999997	9408	1
GOSR2	4	0.022965	0.058602	0.9003	1243	2	0.22099	0.28148	0.999997	5375	1
PTGR1	4	0.022996	0.058677	0.9003	1244	3	0.8428	0.84247	0.999997	15923	0
HHATL	4	0.023018	0.058722	0.9003	1245	2	0.43236	0.44073	0.999997	8342	1
KIAA1161	4	0.023033	0.058763	0.9003	1246	3	0.75622	0.75605	0.999997	14261	0
PRAP1	4	0.023058	0.05882	0.9003	1247	2	0.91547	0.91511	0.999997	17319	0
LPO	4	0.023071	0.058849	0.9003	1248	2	0.37136	0.3908	0.999997	7393	1
KHDC3L	4	0.02311	0.058942	0.9003	1249	3	0.61225	0.61203	0.999997	11590	0
VASP	4	0.02316	0.059051	0.9003	1250	2	0.71458	0.71444	0.999997	13491	0
HIST1H2AM	4	0.023251	0.059243	0.9003	1251	3	0.98181	0.98184	0.999997	18612	0
KHDRBS1	4	0.023255	0.059254	0.9003	1252	3	0.37674	0.39505	0.999997	7476	1
PCP2	4	0.023263	0.05927	0.9003	1253	2	0.90501	0.90451	0.999997	17123	0
APOH	4	0.023285	0.059327	0.9003	1254	3	0.98678	0.98687	0.999997	18749	0
SPRED2	4	0.023315	0.05941	0.9003	1255	2	0.74644	0.74624	0.999997	14082	0
DYNC2H1	4	0.023357	0.059509	0.9003	1256	3	0.63421	0.63402	0.999997	11989	0
DIRC1	4	0.023366	0.059526	0.9003	1257	1	0.059586	0.10847	0.982247	2108	2
RGPD8	4	0.023384	0.059564	0.9003	1258	2	0.92588	0.92565	0.999997	17493	0
TMA16	4	0.023401	0.059598	0.9003	1259	3	0.60737	0.60718	0.999997	11487	0
ELFN2	4	0.023415	0.059626	0.9003	1260	3	0.77739	0.77734	0.999997	14653	0
TMEM63C	4	0.023433	0.059664	0.9003	1261	3	0.88643	0.88598	0.999997	16748	0
OR8G1	4	0.023469	0.059741	0.9003	1262	2	0.22138	0.28175	0.999997	5382	1
FRZB	4	0.023479	0.059764	0.9003	1263	3	0.91479	0.91441	0.999997	17304	0
NCOR2	4	0.023493	0.059798	0.9003	1264	3	0.95909	0.95888	0.999997	18167	0
PSMD4	4	0.02352	0.059857	0.9003	1265	3	0.98994	0.98999	0.999997	18816	0
FAM228B	4	0.02353	0.05988	0.9003	1266	3	0.70995	0.70971	0.999997	13399	0
NBPF8	4	0.023572	0.059966	0.9003	1267	2	0.73272	0.73253	0.999997	13817	0
NSMCE1	4	0.023617	0.060067	0.9003	1268	2	0.64253	0.64227	0.999997	12145	0
RPIA	4	0.023622	0.060075	0.9003	1269	3	0.77136	0.77127	0.999997	14548	0
DPEP2	4	0.023675	0.060196	0.9003	1270	3	0.98548	0.98556	0.999997	18711	0
ABCF1	4	0.02368	0.060205	0.9003	1271	2	0.77512	0.7751	0.999997	14619	0
2018-09-12	4	0.023689	0.060226	0.9003	1272	2	0.11882	0.19347	0.995164	3714	1
ZNF182	4	0.023714	0.060282	0.9003	1273	3	0.8561	0.85587	0.999997	16181	0
KLHL29	4	0.023726	0.060311	0.9003	1274	2	0.041189	0.081461	0.973615	1591	2
OR4D10	4	0.023743	0.060347	0.9003	1275	2	0.77622	0.77617	0.999997	14636	0
ADGRB3	4	0.023746	0.060351	0.9003	1276	3	0.97267	0.97262	0.999997	18427	0
ATR	4	0.023769	0.060395	0.9003	1277	3	0.91997	0.91963	0.999997	17397	0
MRO	4	0.023777	0.060408	0.9003	1278	2	0.65835	0.65803	0.999997	12428	0
ITGAL	4	0.023829	0.060524	0.9003	1279	1	0.14219	0.22667	0.996358	4325	1
VPRBP	4	0.023829	0.060524	0.9003	1280	3	0.98919	0.98924	0.999997	18798	0
LOX	4	0.02386	0.060593	0.9003	1281	2	0.83557	0.83526	0.999997	15775	0
DUS3L	4	0.023866	0.060602	0.9003	1282	3	0.66043	0.66015	0.999997	12462	0
USP17L18	4	0.023869	0.060611	0.9003	1283	2	0.6456	0.64543	0.999997	12197	0
ERVV-2	4	0.02388	0.060631	0.9003	1284	2	0.84892	0.84864	0.999997	16044	0
GOSR1	4	0.023894	0.060666	0.9003	1285	3	0.90626	0.90578	0.999997	17146	0
SAAL1	4	0.023959	0.060819	0.9003	1286	3	0.23144	0.28855	0.999997	5503	1
USP17L12	4	0.023982	0.060872	0.9003	1287	3	0.98403	0.98413	0.999997	18670	0
INHBE	4	0.023983	0.060872	0.9003	1288	2	0.79811	0.79812	0.999997	15030	0
SH3GLB2	4	0.023987	0.06088	0.9003	1289	3	0.30321	0.33912	0.999997	6447	1
SNRPA1	4	0.023991	0.060889	0.9003	1290	3	0.93352	0.93341	0.999997	17653	0
CFL2	4	0.024029	0.060976	0.9003	1291	3	0.88638	0.88593	0.999997	16745	0
ARHGEF18	4	0.024034	0.060989	0.9003	1292	1	0.57368	0.57346	0.999997	10859	0
PPP6R1	4	0.024041	0.061006	0.9003	1293	3	0.057657	0.10561	0.982247	2053	1
MED14	4	0.024071	0.061075	0.9003	1294	3	0.95809	0.95793	0.999997	18140	0
CEP162	4	0.024075	0.061083	0.9003	1295	3	0.43486	0.44283	0.999997	8385	1
MAGT1	4	0.024105	0.061151	0.9003	1296	2	0.57401	0.57382	0.999997	10864	0
HES3	4	0.024137	0.061227	0.9003	1297	2	0.055954	0.10316	0.979366	2011	2
RBM14	4	0.024145	0.06124	0.9003	1298	3	0.99472	0.99477	0.999997	18951	0
GSTM4	4	0.024178	0.061306	0.9003	1299	3	0.77434	0.77433	0.999997	14610	0
PCDHB13	4	0.024187	0.061333	0.9003	1300	3	0.97923	0.9792	0.999997	18557	0
CKAP4	4	0.024214	0.061392	0.9003	1301	2	0.71366	0.71352	0.999997	13475	0
TXNDC15	4	0.02424	0.061451	0.9003	1302	2	0.6711	0.67083	0.999997	12662	0
TMEM151A	4	0.024257	0.061489	0.9003	1303	3	0.80029	0.80025	0.999997	15081	0
OR11H1	4	0.024262	0.061499	0.9003	1304	3	0.97277	0.97273	0.999997	18428	0
GLMN	4	0.024318	0.061628	0.9003	1305	3	0.8586	0.85835	0.999997	16224	0
ACLY	4	0.024328	0.061653	0.9003	1306	3	0.99365	0.99369	0.999997	18915	0
NRARP	4	0.024337	0.061676	0.9003	1307	3	0.64586	0.6457	0.999997	12201	0
ACCS	4	0.024343	0.061691	0.9003	1308	1	0.36174	0.38317	0.999997	7255	1
TPM2	4	0.02435	0.061708	0.9003	1309	2	0.86963	0.8693	0.999997	16435	0
2018-03-02	4	0.024374	0.061758	0.9003	1310	3	0.32432	0.35462	0.999997	6725	1
PDZRN3	4	0.024378	0.061766	0.9003	1311	2	0.47878	0.48153	0.999997	9096	1
ME1	4	0.024394	0.061797	0.9003	1312	1	0.10961	0.18029	0.994071	3464	2
PPP1R32	4	0.024445	0.061915	0.900649	1313	1	0.0047273	0.013299	0.89884	274	2
CFLAR	4	0.024459	0.061941	0.900649	1314	3	0.31187	0.34534	0.999997	6564	1
CEP57	4	0.02452	0.062078	0.900649	1315	3	0.20644	0.27176	0.999047	5197	1
BTF3L4	4	0.024542	0.062126	0.900649	1316	2	0.7166	0.71648	0.999997	13534	0
RDM1	4	0.024544	0.062132	0.900649	1317	3	0.9782	0.97811	0.999997	18539	0
TRIM16L	4	0.024548	0.062144	0.900649	1318	1	0.89543	0.89501	0.999997	16929	0
CKS1B	4	0.024553	0.062151	0.900649	1319	3	0.99498	0.99502	0.999997	18959	0
UBA7	4	0.024599	0.062251	0.901406	1320	1	0.20776	0.27264	0.999047	5213	1
LMAN2L	4	0.024651	0.062361	0.90161	1321	1	0.19356	0.26338	0.997942	5031	1
EFS	4	0.02467	0.062404	0.90161	1322	2	0.8338	0.83349	0.999997	15734	0
CAMK2N2	4	0.0247	0.062473	0.90161	1323	3	0.9654	0.96528	0.999997	18284	0
SRGAP3	4	0.024702	0.062477	0.90161	1324	1	0.15978	0.24144	0.997004	4623	1
TRAPPC10	4	0.02478	0.062648	0.90161	1325	3	0.91086	0.91047	0.999997	17235	0
URI1	4	0.02479	0.062671	0.90161	1326	2	0.84027	0.83992	0.999997	15876	0
ZSCAN16	4	0.024805	0.062703	0.90161	1327	1	0.49228	0.49388	0.999997	9346	1
METTL20	4	0.024826	0.062749	0.90161	1328	2	0.45388	0.45926	0.999997	8684	1
PRR20B	4	0.024854	0.062813	0.90161	1329	2	0.042046	0.082757	0.973615	1618	2
CDC5L	4	0.024861	0.062825	0.90161	1330	3	0.97496	0.97491	0.999997	18480	0
MASP2	4	0.024872	0.062853	0.90161	1331	3	0.8649	0.86458	0.999997	16337	0
GGT5	4	0.02488	0.062867	0.90161	1332	3	0.3221	0.35292	0.999997	6699	1
KCNJ9	4	0.024899	0.062903	0.90161	1333	3	0.46712	0.47092	0.999997	8914	1
MEF2BNB	4	0.024907	0.062925	0.90161	1334	1	0.86931	0.86898	0.999997	16428	0
GEMIN2	4	0.024946	0.063018	0.902269	1335	2	0.94211	0.94189	0.999997	17834	0
C19orf43	4	0.024975	0.063072	0.90228	1336	3	0.938	0.93783	0.999997	17755	0
VMA21	4	0.025027	0.063197	0.90228	1337	3	0.98112	0.98115	0.999997	18597	0
CHCHD4	4	0.025062	0.063268	0.90228	1338	3	0.85324	0.85298	0.999997	16122	0
APPL1	4	0.02507	0.063284	0.90228	1339	3	0.25651	0.30572	0.999997	5830	1
CRIPT	4	0.025075	0.063298	0.90228	1340	3	0.91899	0.91866	0.999997	17379	0
AVEN	4	0.025113	0.063378	0.90228	1341	1	0.39374	0.40871	0.999997	7740	1
SPANXC	4	0.025164	0.063484	0.90228	1342	2	0.69216	0.69183	0.999997	13083	0
CLDN14	4	0.02518	0.063523	0.90228	1343	3	0.78043	0.78045	0.999997	14704	0
PI4KA	4	0.025216	0.063596	0.90228	1344	2	0.010502	0.027717	0.902628	578	1
EIF5A	4	0.025267	0.063702	0.90228	1345	2	0.93352	0.93341	0.999997	17693	0
UGT1A7	4	0.025291	0.063756	0.90228	1346	3	0.99294	0.99296	0.999997	18893	0
TTF1	4	0.02531	0.063806	0.90228	1347	3	0.7206	0.7205	0.999997	13604	0
MTERF4	4	0.025325	0.063843	0.90228	1348	3	0.64854	0.64829	0.999997	12247	0
CD180	4	0.025353	0.063914	0.90228	1349	3	0.5623	0.56203	0.999997	10647	0
MRPS6	4	0.025353	0.063914	0.90228	1350	2	0.95278	0.95262	0.999997	18045	0
ZNF26	4	0.02537	0.063947	0.90228	1351	2	0.59749	0.59721	0.999997	11292	0
CHD8	4	0.025381	0.063969	0.90228	1352	3	0.98663	0.98671	0.999997	18745	0
CGB1	4	0.02539	0.063989	0.90228	1353	2	0.95397	0.95383	0.999997	18063	0
NUDCD3	4	0.025455	0.064137	0.90228	1354	2	0.12541	0.20281	0.99574	3885	2
MRPL57	4	0.025472	0.064173	0.90228	1355	2	0.90748	0.90702	0.999997	17174	0
DMRTC1B	4	0.025488	0.064205	0.90228	1356	3	0.8754	0.87504	0.999997	16537	0
IFIT3	4	0.025524	0.064293	0.90228	1357	1	0.49577	0.49708	0.999997	9404	1
GDPD3	4	0.025531	0.064303	0.90228	1358	3	0.5874	0.58719	0.999997	11114	0
TXNRD1	4	0.025585	0.064426	0.90228	1359	3	0.92983	0.92967	0.999997	17575	0
TSSC1	4	0.025589	0.064433	0.90228	1360	3	0.99408	0.99411	0.999997	18928	0
RBM42	4	0.025604	0.064469	0.90228	1361	2	0.43751	0.44506	0.999997	8425	1
FPR3	4	0.025623	0.0645	0.90228	1362	2	0.44499	0.45158	0.999997	8543	1
TWISTNB	4	0.025628	0.06451	0.90228	1363	3	0.99478	0.99483	0.999997	18952	0
VPS26A	4	0.025642	0.064547	0.90228	1364	2	0.66354	0.66321	0.999997	12512	0
EBPL	4	0.025652	0.064573	0.90228	1365	3	0.9902	0.99024	0.999997	18819	0
SLC35F3	4	0.025657	0.064587	0.90228	1366	3	0.622	0.62182	0.999997	11767	0
ACER1	4	0.025667	0.064601	0.90228	1367	3	0.96204	0.96187	0.999997	18221	0
CPN2	4	0.02567	0.064613	0.90228	1368	3	0.13193	0.21206	0.996358	4059	1
TMEM120B	4	0.025677	0.064627	0.90228	1369	2	0.34067	0.36689	0.999997	6947	1
KLF6	4	0.025698	0.064671	0.90228	1370	3	0.96056	0.96044	0.999997	18196	0
CTNND2	4	0.025729	0.064732	0.90235	1371	1	0.13728	0.21968	0.996358	4202	1
RASGRP1	4	0.025744	0.064771	0.90235	1372	3	0.31574	0.34816	0.999997	6616	1
TCF25	4	0.02578	0.064843	0.902696	1373	2	2.6164e-05	0.00011318	0.47454	3	1
OR1J4	4	0.025847	0.064993	0.902839	1374	3	0.71173	0.71155	0.999997	13435	0
ARL6IP5	4	0.025851	0.065003	0.902839	1375	3	0.90092	0.90051	0.999997	17050	0
TUBG1	4	0.025883	0.065062	0.902839	1376	3	0.99091	0.99092	0.999997	18835	0
CLHC1	4	0.025922	0.065153	0.902839	1377	2	0.43761	0.44515	0.999997	8428	1
KRT13	4	0.025934	0.065179	0.902839	1378	1	0.35574	0.37855	0.999997	7162	1
PLA2G16	4	0.025969	0.065267	0.902839	1379	2	0.49752	0.49872	0.999997	9435	1
F8A1	4	0.025985	0.065302	0.902839	1380	2	0.20767	0.27259	0.999047	5212	1
NEURL4	4	0.025997	0.065324	0.902839	1381	2	0.4773	0.48019	0.999997	9081	1
GJA3	4	0.026037	0.065408	0.902839	1382	1	0.77524	0.77522	0.999997	14620	0
TMPRSS11A	4	0.026076	0.065512	0.902839	1383	3	0.36591	0.38646	0.999997	7316	1
GEMIN5	4	0.026088	0.065542	0.902839	1384	1	0.62049	0.62031	0.999997	11732	0
EYA2	4	0.026139	0.065656	0.902839	1385	2	0.71576	0.71564	0.999997	13514	0
PNMA1	4	0.026159	0.065701	0.902839	1386	3	0.92906	0.92891	0.999997	17565	0
TRPM4	4	0.026191	0.065774	0.902839	1387	1	0.31452	0.34728	0.999997	6597	1
PPIL1	4	0.026198	0.065789	0.902839	1388	3	0.76178	0.76162	0.999997	14363	0
SLC14A1	4	0.026228	0.065862	0.902839	1389	3	0.79888	0.79887	0.999997	15053	0
IPO4	4	0.026242	0.065895	0.902839	1390	1	0.52099	0.52119	0.999997	9877	1
ZNF649	4	0.026257	0.065927	0.902839	1391	3	0.81392	0.81387	0.999997	15365	0
C14orf80	4	0.02628	0.065973	0.902839	1392	3	0.90582	0.90535	0.999997	17139	0
NOP10	4	0.026336	0.066115	0.902839	1393	2	0.9247	0.92444	0.999997	17472	0
PSMC2	4	0.026344	0.066131	0.902839	1394	1	0.88536	0.88491	0.999997	16719	0
GFER	4	0.026366	0.066177	0.902839	1395	3	0.84852	0.84824	0.999997	16039	0
CAP1	4	0.026383	0.066207	0.902839	1396	2	0.75693	0.75676	0.999997	14274	0
ENKUR	4	0.02641	0.066264	0.902839	1397	3	0.89446	0.89402	0.999997	16901	0
RPS3	4	0.026459	0.066376	0.902839	1398	3	0.65476	0.65442	0.999997	12359	0
FGF22	4	0.026464	0.066386	0.902839	1399	3	0.93531	0.93526	0.999997	17706	0
PDPR	4	0.026468	0.066393	0.902839	1400	3	0.98355	0.98364	0.999997	18654	0
E2F8	4	0.026498	0.066461	0.902839	1401	2	0.72565	0.72551	0.999997	13693	0
MAP3K15	4	0.026543	0.066563	0.902839	1402	3	0.99456	0.99461	0.999997	18946	0
TRAPPC6A	4	0.026544	0.066564	0.902839	1403	2	0.80124	0.80119	0.999997	15103	0
NDUFAF1	4	0.02655	0.066579	0.902839	1404	1	0.757	0.75683	0.999997	14277	0
CLEC3B	4	0.026558	0.066595	0.902839	1405	3	0.29677	0.33445	0.999997	6364	1
IK	4	0.026582	0.066649	0.902839	1406	3	0.90086	0.90044	0.999997	17048	0
UBN1	4	0.026601	0.066693	0.902839	1407	1	0.24373	0.29694	0.999997	5653	1
TBCC	4	0.026603	0.066696	0.902839	1408	3	0.92665	0.92643	0.999997	17508	0
PTGFRN	4	0.026633	0.066771	0.902839	1409	3	0.23572	0.29141	0.999997	5557	1
GPR4	4	0.026639	0.06679	0.902839	1410	2	0.92035	0.92001	0.999997	17404	0
DHCR24	4	0.026652	0.066815	0.902839	1411	1	0.33687	0.364	0.999997	6896	1
C22orf42	4	0.026682	0.066884	0.902839	1412	3	0.96855	0.96842	0.999997	18345	0
INS-IGF2	4	0.026687	0.066897	0.902839	1413	2	0.16664	0.24582	0.997004	4708	1
NFIL3	4	0.026703	0.066935	0.902839	1414	1	0.087669	0.14898	0.988199	2871	2
GNG11	4	0.026712	0.066955	0.902839	1415	3	0.67515	0.67486	0.999997	12748	0
SMO	4	0.026722	0.066978	0.902839	1416	3	0.99438	0.99441	0.999997	18937	0
ZNF576	4	0.026747	0.067023	0.902839	1417	3	0.97745	0.97733	0.999997	18526	0
IL9	4	0.026772	0.067076	0.902839	1418	2	0.91724	0.91696	0.999997	17350	0
PRAMEF10	4	0.026796	0.067135	0.902839	1419	3	0.9897	0.98974	0.999997	18811	0
C11orf86	4	0.026806	0.067155	0.902839	1420	3	0.92216	0.92187	0.999997	17432	0
RNMT	4	0.02682	0.06719	0.902839	1421	3	0.9944	0.99443	0.999997	18939	0
SIAH2	4	0.026857	0.067274	0.902839	1422	1	0.72828	0.72816	0.999997	13741	0
TAS1R3	4	0.026866	0.067299	0.902839	1423	3	0.024548	0.05669	0.952239	1134	1
CERCAM	4	0.026871	0.067313	0.902839	1424	3	0.39406	0.40897	0.999997	7746	1
DSCAM	4	0.026877	0.067326	0.902839	1425	2	0.96317	0.96303	0.999997	18244	0
CPXCR1	4	0.026896	0.067365	0.902839	1426	2	0.88081	0.88038	0.999997	16642	0
FAM178A	4	0.027041	0.067681	0.902839	1427	3	0.99191	0.99192	0.999997	18868	0
ADAM10	4	0.027046	0.067691	0.902839	1428	3	0.96531	0.96519	0.999997	18282	0
ZNF281	4	0.027096	0.06781	0.902839	1429	3	0.9422	0.94198	0.999997	17835	0
BACH1	4	0.027114	0.067845	0.902839	1430	2	0.9246	0.92434	0.999997	17471	0
POU6F1	4	0.027135	0.067888	0.902839	1431	2	0.92479	0.92452	0.999997	17473	0
ALG1L	4	0.027154	0.067933	0.902839	1432	2	0.17745	0.25285	0.997942	4837	1
HARS	4	0.027181	0.067994	0.902839	1433	3	0.91751	0.91721	0.999997	17356	0
SRBD1	4	0.027196	0.068029	0.902839	1434	3	0.86278	0.86251	0.999997	16291	0
NCKAP5L	4	0.027216	0.068074	0.902839	1435	1	0.68269	0.6824	0.999997	12896	0
MRPS34	4	0.027221	0.068081	0.902839	1436	3	0.99259	0.9926	0.999997	18887	0
CENPJ	4	0.027267	0.068178	0.902839	1437	2	0.37663	0.39497	0.999997	7475	1
DSN1	4	0.027269	0.068181	0.902839	1438	2	0.84884	0.84856	0.999997	16041	0
NMT1	4	0.027317	0.068289	0.902839	1439	2	0.91599	0.91565	0.999997	17329	0
ATOH8	4	0.027336	0.068337	0.902839	1440	2	0.11996	0.19508	0.995677	3743	2
SNRNP200	4	0.027347	0.06836	0.902839	1441	3	0.98677	0.98686	0.999997	18748	0
TP53RK	4	0.02737	0.068407	0.902839	1442	3	0.98514	0.98523	0.999997	18705	0
PA2G4	4	0.027421	0.068512	0.902839	1443	2	0.67055	0.67028	0.999997	12651	0
COPZ1	4	0.027422	0.068516	0.902839	1444	2	0.55767	0.55733	0.999997	10562	0
SSX4	4	0.027472	0.068633	0.902839	1445	2	0.029842	0.064619	0.964407	1278	2
CAPZB	4	0.027484	0.068652	0.902839	1446	3	0.96563	0.9655	0.999997	18288	0
SSPO	4	0.027524	0.068728	0.902839	1447	1	0.47398	0.47711	0.999997	9026	1
PPP1R11	4	0.027555	0.0688	0.902839	1448	3	0.16207	0.24293	0.997004	4648	1
C17orf74	4	0.027575	0.06884	0.902839	1449	2	0.85463	0.85435	0.999997	16148	0
KDM1A	4	0.027615	0.068932	0.902839	1450	3	0.99237	0.99237	0.999997	18877	0
H2AFY2	4	0.027625	0.068953	0.902839	1451	2	0.2749	0.31854	0.999997	6067	1
HIST1H4C	4	0.027692	0.069086	0.902839	1452	3	0.99061	0.99064	0.999997	18824	0
BMP8A	4	0.027692	0.069087	0.902839	1453	2	0.79058	0.79063	0.999997	14897	0
TSR3	4	0.027702	0.06911	0.902839	1454	2	0.51302	0.51355	0.999997	9722	1
HELZ2	4	0.027707	0.06912	0.902839	1455	3	0.76109	0.76092	0.999997	14348	0
PPP1CB	4	0.027729	0.069163	0.902839	1456	1	0.83942	0.83908	0.999997	15854	0
RAB17	4	0.02774	0.069194	0.902839	1457	2	0.65732	0.65701	0.999997	12408	0
SPC24	4	0.027768	0.069254	0.902839	1458	3	0.97684	0.97672	0.999997	18514	0
DROSHA	4	0.027778	0.069279	0.902839	1459	3	0.29023	0.32967	0.999997	6279	1
SMOX	4	0.027779	0.06928	0.902839	1460	2	0.77134	0.77124	0.999997	14547	0
NDE1	4	0.02778	0.069281	0.902839	1461	2	0.051788	0.097019	0.974723	1897	1
TBC1D3F	4	0.027783	0.069285	0.902839	1462	3	0.99077	0.99079	0.999997	18830	0
IQCB1	4	0.027788	0.069293	0.902839	1463	3	0.94865	0.94846	0.999997	17954	0
UBC	4	0.027789	0.069294	0.902839	1464	2	0.62902	0.62881	0.999997	11897	0
SURF4	4	0.027818	0.069347	0.902839	1465	2	0.096553	0.16163	0.988199	3123	2
CLIP3	4	0.027831	0.069375	0.902839	1466	3	0.61706	0.61686	0.999997	11671	0
HSP90AB1	4	0.027837	0.069389	0.902839	1467	2	0.10675	0.17624	0.994071	3365	2
CD40LG	4	0.027882	0.069493	0.902839	1468	3	0.23041	0.28784	0.999997	5487	1
HLA-DQB2	4	0.027895	0.069514	0.902839	1469	2	0.5266	0.52658	0.999997	9981	1
TSPAN12	4	0.027933	0.069593	0.902839	1470	1	0.50562	0.50644	0.999997	9586	1
NKIRAS1	4	0.027967	0.069665	0.902839	1471	3	0.79835	0.79833	0.999997	15037	0
ACP1	4	0.027985	0.069711	0.902839	1472	2	0.31747	0.3495	0.999997	6643	1
ELL	4	0.027997	0.069738	0.902839	1473	3	0.80166	0.80161	0.999997	15110	0
FNTB	4	0.028018	0.069778	0.902839	1474	3	0.99296	0.99299	0.999997	18895	0
GNB5	4	0.028021	0.069791	0.902839	1475	2	0.2075	0.27247	0.999047	5210	1
ODF2L	4	0.028036	0.069825	0.902839	1476	1	0.42852	0.43751	0.999997	8293	1
GTF3A	4	0.028069	0.06989	0.902839	1477	3	0.96024	0.96009	0.999997	18190	0
LMNB1	4	0.028087	0.069936	0.902839	1478	2	0.5098	0.51048	0.999997	9661	1
HOMER3	4	0.028099	0.069958	0.902839	1479	2	0.70132	0.70105	0.999997	13248	0
VGLL3	4	0.028138	0.070031	0.902839	1480	1	0.13864	0.22164	0.996358	4231	1
SLC51A	4	0.028141	0.070036	0.902839	1481	3	0.74338	0.74314	0.999997	14016	0
PGRMC2	4	0.028172	0.070099	0.902839	1482	3	0.99073	0.99075	0.999997	18829	0
PARP16	4	0.02819	0.07014	0.902839	1483	1	0.76143	0.76125	0.999997	14355	0
METTL1	4	0.028197	0.070158	0.902839	1484	3	0.98272	0.98276	0.999997	18635	0
SYCE3	4	0.028225	0.070212	0.902839	1485	2	0.92051	0.92018	0.999997	17407	0
SURF2	4	0.028292	0.070341	0.902839	1486	2	0.47549	0.47857	0.999997	9052	1
PSMB3	4	0.028321	0.070399	0.902839	1487	3	0.99259	0.99259	0.999997	18886	0
CCDC173	4	0.028342	0.070444	0.902839	1488	3	0.97448	0.97444	0.999997	18472	0
PPP3CA	4	0.028343	0.070447	0.902839	1489	2	0.92026	0.91993	0.999997	17403	0
MCMDC2	4	0.028352	0.07047	0.902839	1490	2	0.84803	0.84772	0.999997	16023	0
ALG9	4	0.028408	0.070588	0.902839	1491	3	0.84123	0.84091	0.999997	15894	0
FTSJ3	4	0.02845	0.070665	0.902839	1492	2	0.3797	0.39741	0.999997	7519	1
INPP5J	4	0.028486	0.070747	0.902839	1493	3	0.83479	0.83447	0.999997	15753	0
GID8	4	0.028497	0.070772	0.902839	1494	1	0.64677	0.64657	0.999997	12211	0
MCM3AP	4	0.028518	0.070827	0.902839	1495	2	0.80264	0.80258	0.999997	15126	0
C7orf49	4	0.028532	0.070865	0.902839	1496	3	0.33073	0.3594	0.999997	6806	1
RBM19	4	0.028538	0.070875	0.902839	1497	3	0.26991	0.31502	0.999997	6004	1
NUBP1	4	0.028543	0.070885	0.902839	1498	3	0.93903	0.93887	0.999997	17781	0
PKP1	4	0.028548	0.070901	0.902839	1499	2	0.74279	0.74255	0.999997	14007	0
GLTPD2	4	0.028577	0.070959	0.902839	1500	3	0.34315	0.36885	0.999997	6978	1
NUTM2B	4	0.028587	0.070976	0.902839	1501	2	0.10315	0.17108	0.994071	3280	1
OXSR1	4	0.028606	0.071024	0.902839	1502	2	0.054199	0.1006	0.974723	1971	1
GNMT	4	0.028636	0.071091	0.902839	1503	3	0.96618	0.96604	0.999997	18301	0
ABCB10	4	0.028657	0.071143	0.902839	1504	3	0.98629	0.98637	0.999997	18735	0
C19orf70	4	0.028685	0.071206	0.902839	1505	3	0.96434	0.96422	0.999997	18264	0
DNAJC24	4	0.028698	0.071235	0.902839	1506	3	0.46464	0.46874	0.999997	8869	1
ANKRD32	4	0.028702	0.07124	0.902839	1507	1	0.026801	0.060071	0.956031	1201	2
EXOSC6	4	0.028753	0.071358	0.902839	1508	1	0.849	0.84873	0.999997	16045	0
PRSS22	4	0.028753	0.07136	0.902839	1509	2	0.6983	0.69802	0.999997	13195	0
HNRNPAB	4	0.028773	0.071407	0.902839	1510	3	0.94037	0.9402	0.999997	17809	0
DHDDS	4	0.028783	0.071427	0.902839	1511	2	0.57492	0.57475	0.999997	10883	0
KLB	4	0.028797	0.071455	0.902839	1512	3	0.94433	0.94409	0.999997	17872	0
ADCYAP1R1	4	0.028804	0.071466	0.902839	1513	1	0.43233	0.4407	0.999997	8341	1
KRTAP6-2	4	0.028852	0.071559	0.902934	1514	2	0.68176	0.68147	0.999997	12876	0
HPS6	4	0.028855	0.071568	0.902934	1515	1	0.014464	0.037313	0.912393	778	2
ZFP36L2	4	0.028912	0.071696	0.903301	1516	3	0.64219	0.64193	0.999997	12139	0
DHRS7B	4	0.02893	0.071732	0.903301	1517	2	0.67809	0.67778	0.999997	12800	0
ETS1	4	0.028943	0.071755	0.903301	1518	3	0.83335	0.83305	0.999997	15729	0
HSPA2	4	0.028958	0.071786	0.903301	1519	2	0.63184	0.63164	0.999997	11952	0
MTERF1	4	0.029	0.071874	0.903814	1520	3	0.99404	0.99407	0.999997	18927	0
SNAI3	4	0.029059	0.072001	0.904084	1521	3	0.35915	0.38121	0.999997	7219	1
CETP	4	0.02906	0.072004	0.904084	1522	1	0.52639	0.52636	0.999997	9978	1
PMF1-BGLAP	4	0.029088	0.072075	0.904084	1523	2	0.80637	0.80634	0.999997	15213	0
FOXD4L1	4	0.029098	0.0721	0.904084	1524	2	0.80837	0.80834	0.999997	15250	0
MCM2	4	0.029111	0.072132	0.904084	1525	1	0.96399	0.96387	0.999997	18260	0
DBNDD2	4	0.029162	0.072247	0.904932	1526	2	0.42255	0.43249	0.999997	8195	1
SF3B5	4	0.029187	0.072299	0.904959	1527	2	0.93352	0.93341	0.999997	17690	0
MSRB1	4	0.029214	0.07235	0.904959	1528	1	0.96704	0.96692	0.999997	18318	0
SPOCD1	4	0.029257	0.07245	0.904959	1529	3	0.37707	0.39531	0.999997	7483	1
LRRC37A2	4	0.029265	0.072471	0.904959	1530	2	0.77048	0.77036	0.999997	14534	0
INCENP	4	0.029289	0.072523	0.904959	1531	3	0.79079	0.79084	0.999997	14899	0
IP6K1	4	0.029305	0.072562	0.904959	1532	3	0.97962	0.97962	0.999997	18565	0
HS3ST3B1	4	0.029316	0.07258	0.904959	1533	2	0.96652	0.96639	0.999997	18312	0
CDK5RAP1	4	0.029335	0.072631	0.905001	1534	2	0.53711	0.53678	0.999997	10183	1
CALML3	4	0.029367	0.072697	0.905231	1535	1	0.19276	0.26287	0.997942	5020	1
CHURC1-FNTB	4	0.029418	0.072808	0.905902	1536	2	0.81034	0.8103	0.999997	15290	0
AP1B1	4	0.029464	0.072892	0.905902	1537	3	0.59078	0.59052	0.999997	11177	0
CCDC137	4	0.029469	0.072907	0.905902	1538	1	0.34935	0.37366	0.999997	7067	1
SOX11	4	0.029521	0.073017	0.905902	1539	2	0.4259	0.43531	0.999997	8249	1
SHFM1	4	0.029544	0.073063	0.905902	1540	2	0.73987	0.73965	0.999997	13954	0
TMEM30A	4	0.029572	0.073123	0.905902	1541	2	0.42417	0.43385	0.999997	8229	1
ZNF626	4	0.029593	0.073169	0.905902	1542	3	0.93352	0.93341	0.999997	17624	0
C9orf9	4	0.0296	0.07318	0.905902	1543	3	0.42071	0.43097	0.999997	8162	1
B4GALT1	4	0.029603	0.07319	0.905902	1544	2	0.34399	0.36948	0.999997	6989	1
KRTAP13-4	4	0.029623	0.073225	0.905902	1545	1	0.59281	0.59262	0.999997	11209	0
CACNB3	4	0.029725	0.073442	0.907296	1546	2	0.8267	0.82649	0.999997	15606	0
HIST2H3A	4	0.029727	0.073449	0.907296	1547	3	0.91726	0.91698	0.999997	17351	0
NUP35	4	0.029763	0.073529	0.907296	1548	2	0.95307	0.95292	0.999997	18049	0
SH3D21	4	0.029776	0.073566	0.907296	1549	2	0.40239	0.41576	0.999997	7883	1
COX5A	4	0.029783	0.073585	0.907296	1550	2	0.94283	0.9426	0.999997	17845	0
MIR205HG	4	0.029818	0.073654	0.907296	1551	3	0.93352	0.93341	0.999997	17617	0
C2orf16	4	0.029828	0.07367	0.907296	1552	2	0.00065394	0.0024152	0.769456	56	2
HOGA1	4	0.029865	0.073753	0.907396	1553	3	0.67634	0.67607	0.999997	12766	0
HELZ	4	0.029872	0.073773	0.907396	1554	2	0.10388	0.17212	0.994071	3299	1
SCP2D1	4	0.029902	0.07384	0.907432	1555	2	0.40139	0.41494	0.999997	7866	1
BRD3	4	0.02993	0.073895	0.907432	1556	1	0.23871	0.29349	0.999997	5599	1
ALKBH1	4	0.029981	0.07401	0.907432	1557	1	0.73744	0.73723	0.999997	13907	0
CRELD2	4	0.030009	0.074066	0.907432	1558	3	0.98414	0.98424	0.999997	18674	0
FAM189A2	4	0.030032	0.074121	0.907432	1559	1	0.75218	0.75202	0.999997	14181	0
ZNF695	4	0.030186	0.074475	0.907432	1560	1	0.58478	0.58456	0.999997	11068	0
GPR17	4	0.030223	0.07457	0.907432	1561	2	0.96915	0.96903	0.999997	18358	0
IGFBP7	4	0.030261	0.074656	0.907432	1562	3	0.95724	0.95706	0.999997	18130	0
TRO	4	0.030263	0.07466	0.907432	1563	2	0.52372	0.5238	0.999997	9928	1
CST2	4	0.030277	0.0747	0.907432	1564	3	0.96102	0.96089	0.999997	18203	0
GOLGA6L10	4	0.030288	0.074724	0.907432	1565	3	0.48357	0.48588	0.999997	9181	1
USP17L28	4	0.030288	0.074725	0.907432	1566	2	0.23632	0.29183	0.999997	5569	1
GGH	4	0.030313	0.074773	0.907432	1567	2	0.71773	0.71766	0.999997	13552	0
SLK	4	0.030336	0.074816	0.907432	1568	3	0.5424	0.54203	0.999997	10270	0
POLD3	4	0.030339	0.074824	0.907432	1569	2	0.91346	0.91309	0.999997	17282	0
AHCYL1	4	0.030353	0.074856	0.907432	1570	2	0.23101	0.28826	0.999997	5494	1
ACSBG1	4	0.030395	0.074953	0.907432	1571	3	0.8936	0.89317	0.999997	16887	0
NGDN	4	0.030441	0.075053	0.907432	1572	2	0.50439	0.50528	0.999997	9560	1
HDDC2	4	0.030471	0.075124	0.907432	1573	3	0.50974	0.51042	0.999997	9660	1
KIAA0753	4	0.030492	0.075165	0.907432	1574	3	0.68433	0.68401	0.999997	12923	0
RAD51B	4	0.030492	0.075165	0.907432	1575	2	0.86114	0.86089	0.999997	16265	0
NIP7	4	0.030545	0.075299	0.907432	1576	3	0.53411	0.53383	0.999997	10126	1
BNIPL	4	0.030595	0.075413	0.907432	1577	2	0.82585	0.82565	0.999997	15594	0
DAZAP2	4	0.0306	0.075426	0.907432	1578	3	0.87192	0.87152	0.999997	16477	0
NFAT5	4	0.030615	0.075455	0.907432	1579	2	0.082777	0.14198	0.988199	2741	1
FUZ	4	0.030646	0.075514	0.907432	1580	1	0.55342	0.55308	0.999997	10485	0
ZNF784	4	0.030692	0.07562	0.907432	1581	3	0.94816	0.94797	0.999997	17942	0
OR8D1	4	0.030697	0.075633	0.907432	1582	2	0.81254	0.81245	0.999997	15336	0
ADAMTS13	4	0.030714	0.075676	0.907432	1583	3	0.98132	0.98133	0.999997	18602	0
TFIP11	4	0.030716	0.075679	0.907432	1584	2	0.55139	0.55103	0.999997	10441	0
TSFM	4	0.030727	0.075695	0.907432	1585	2	0.96778	0.96763	0.999997	18328	0
KRTAP9-4	4	0.030748	0.075746	0.907432	1586	1	0.13056	0.21013	0.996358	4029	1
TRAM2	4	0.030757	0.075767	0.907432	1587	2	0.9732	0.97316	0.999997	18439	0
PLCD4	4	0.030757	0.075767	0.907432	1588	3	0.5382	0.5378	0.999997	10203	1
DYNC1I2	4	0.03079	0.075846	0.907432	1589	3	0.4025	0.41586	0.999997	7885	1
VEPH1	4	0.030799	0.075865	0.907432	1590	1	0.50092	0.50198	0.999997	9506	1
ARHGEF1	4	0.030822	0.075917	0.907432	1591	3	0.11386	0.1864	0.994438	3582	1
SFSWAP	4	0.03085	0.075997	0.907432	1592	2	0.91169	0.91131	0.999997	17250	0
PTPN21	4	0.030878	0.076054	0.907432	1593	2	0.072	0.12647	0.987051	2438	2
RRNAD1	4	0.030901	0.076096	0.907432	1594	2	0.075003	0.13083	0.987051	2525	1
MSC	4	0.030952	0.076213	0.907432	1595	2	0.65026	0.65002	0.999997	12280	0
PARD3	4	0.030974	0.076253	0.907432	1596	3	0.98142	0.98143	0.999997	18605	0
TP53BP1	4	0.03098	0.076268	0.907432	1597	3	0.092206	0.15544	0.988199	3001	1
CCDC105	4	0.03099	0.076287	0.907432	1598	2	0.53837	0.53797	0.999997	10206	1
ERVW-1	4	0.031023	0.076376	0.907432	1599	3	0.36929	0.38914	0.999997	7365	1
SOX10	4	0.031055	0.076446	0.907432	1600	1	0.29616	0.334	0.999997	6356	1
SRCAP	4	0.031083	0.076508	0.907432	1601	3	0.96273	0.9626	0.999997	18234	0
AEBP1	4	0.031106	0.076565	0.907432	1602	3	0.9748	0.97475	0.999997	18478	0
RPUSD3	4	0.031112	0.07658	0.907432	1603	2	0.1046	0.17317	0.994071	3318	1
CRTC2	4	0.031132	0.07662	0.907432	1604	2	0.16262	0.24327	0.997004	4654	1
SLC6A11	4	0.031157	0.076684	0.907432	1605	1	0.86964	0.86931	0.999997	16436	0
CYBRD1	4	0.031203	0.076792	0.907432	1606	2	0.081157	0.1397	0.987217	2704	2
DNAH9	4	0.031208	0.076797	0.907432	1607	2	0.19592	0.26492	0.997942	5064	1
MPP5	4	0.031225	0.076831	0.907432	1608	3	0.98852	0.9886	0.999997	18785	0
ZC3H18	4	0.031234	0.076849	0.907432	1609	2	0.78987	0.7899	0.999997	14880	0
NOP2	4	0.031259	0.076906	0.907432	1610	2	0.98702	0.9871	0.999997	18752	0
LTBP4	4	0.031269	0.07693	0.907432	1611	3	0.97248	0.97243	0.999997	18422	0
U2SURP	4	0.03131	0.077006	0.907432	1612	1	0.68088	0.68057	0.999997	12860	0
GFPT1	4	0.031335	0.077058	0.907432	1613	3	0.89487	0.89445	0.999997	16914	0
LCE1A	4	0.03134	0.077069	0.907432	1614	3	0.35238	0.37596	0.999997	7105	1
PGLYRP4	4	0.031361	0.07712	0.907432	1615	1	0.14545	0.23128	0.996358	4432	1
FOXO1	4	0.031362	0.077122	0.907432	1616	3	0.95942	0.95924	0.999997	18169	0
NPTXR	4	0.031379	0.077155	0.907432	1617	3	0.99122	0.99123	0.999997	18842	0
ACVR1C	4	0.031387	0.077177	0.907432	1618	2	0.75771	0.75752	0.999997	14292	0
FRMD8	4	0.031401	0.077205	0.907432	1619	3	0.96718	0.96706	0.999997	18322	0
KCNC1	4	0.031407	0.077224	0.907432	1620	2	0.29443	0.33274	0.999997	6337	1
CCL25	4	0.031463	0.077343	0.907432	1621	1	0.88299	0.8826	0.999997	16679	0
IGDCC3	4	0.031509	0.077433	0.907432	1622	2	0.89178	0.89137	0.999997	16865	0
CELF6	4	0.031514	0.077443	0.907432	1623	2	0.19516	0.26446	0.997942	5053	1
RNF181	4	0.031516	0.077452	0.907432	1624	3	0.92603	0.92579	0.999997	17496	0
CISH	4	0.03153	0.077477	0.907432	1625	2	0.50852	0.50926	0.999997	9636	1
TMBIM4	4	0.031533	0.077483	0.907432	1626	3	0.87494	0.87457	0.999997	16526	0
ZNF705G	4	0.031549	0.07752	0.907432	1627	3	0.92538	0.92512	0.999997	17485	0
E2F2	4	0.03155	0.077522	0.907432	1628	2	0.39158	0.40697	0.999997	7707	1
GPKOW	4	0.031555	0.077528	0.907432	1629	3	0.49276	0.49435	0.999997	9355	1
PKNOX1	4	0.031566	0.07755	0.907432	1630	2	0.092334	0.15563	0.988199	3007	2
NRG4	4	0.031566	0.077551	0.907432	1631	3	0.97285	0.97281	0.999997	18429	0
2018-09-05	4	0.031588	0.077597	0.907432	1632	3	0.61101	0.61078	0.999997	11569	0
SLC35C1	4	0.031599	0.077622	0.907432	1633	3	0.69227	0.69194	0.999997	13088	0
KIAA1549L	4	0.031612	0.077648	0.907432	1634	3	0.083218	0.14261	0.988199	2750	1
NLGN4X	4	0.031617	0.077658	0.907432	1635	2	0.78916	0.78914	0.999997	14868	0
LOC101060321	4	0.031622	0.077669	0.907432	1636	2	0.1118	0.18345	0.994438	3521	2
OSBPL9	4	0.031719	0.077866	0.9075	1637	1	0.31896	0.35062	0.999997	6666	1
IMPDH2	4	0.031724	0.077881	0.9075	1638	2	0.95045	0.95027	0.999997	18002	0
MYO3A	4	0.03177	0.077984	0.9075	1639	2	0.29234	0.33122	0.999997	6310	1
TMEM234	4	0.031786	0.078021	0.9075	1640	3	0.99252	0.99252	0.999997	18880	0
SPSB2	4	0.031792	0.078035	0.9075	1641	3	0.70077	0.70049	0.999997	13237	0
NUP85	4	0.031821	0.078097	0.9075	1642	1	0.47255	0.4758	0.999997	9008	1
ARHGAP23	4	0.031837	0.078134	0.9075	1643	2	0.96202	0.96184	0.999997	18220	0
TRIM14	4	0.031858	0.078173	0.9075	1644	2	0.44633	0.45275	0.999997	8572	1
IZUMO4	4	0.031872	0.078207	0.9075	1645	2	0.24161	0.29545	0.999997	5629	1
MRPS33	4	0.031897	0.078253	0.9075	1646	3	0.9444	0.94416	0.999997	17874	0
PRAMEF7	4	0.031923	0.078307	0.9075	1647	1	0.045834	0.088407	0.973615	1728	2
FKBP11	4	0.03193	0.078322	0.9075	1648	2	0.13248	0.21284	0.996358	4074	2
RBBP4	4	0.031942	0.078345	0.9075	1649	3	0.88685	0.88639	0.999997	16761	0
ATP6V0D1	4	0.031971	0.078413	0.9075	1650	2	0.93352	0.93341	0.999997	17666	0
BMP2	4	0.031974	0.07842	0.9075	1651	1	0.269	0.31439	0.999997	5993	1
HEATR5B	4	0.032014	0.07851	0.9075	1652	3	0.53361	0.53338	0.999997	10116	1
METTL7B	4	0.032022	0.078521	0.9075	1653	2	0.20648	0.27179	0.999047	5198	1
FIGF	4	0.032025	0.078529	0.9075	1654	1	0.81328	0.8132	0.999997	15353	0
SENP6	4	0.032074	0.078638	0.907701	1655	2	0.35075	0.37474	0.999997	7084	1
UACA	4	0.032076	0.078641	0.907701	1656	2	0.80382	0.80377	0.999997	15155	0
MECR	4	0.032127	0.078752	0.908103	1657	2	0.99254	0.99254	0.999997	18881	0
CT45A6	4	0.032156	0.078819	0.908103	1658	2	0.93352	0.93341	0.999997	17683	0
NEFM	4	0.032178	0.07887	0.908103	1659	2	0.93052	0.93042	0.999997	17588	0
RICTOR	4	0.032187	0.078888	0.908103	1660	2	0.99071	0.99073	0.999997	18828	0
ZNF594	4	0.032229	0.078982	0.908103	1661	1	0.23696	0.2923	0.999997	5577	1
BRF2	4	0.032276	0.079078	0.908103	1662	3	0.98623	0.98631	0.999997	18734	0
SPIB	4	0.032326	0.079179	0.908103	1663	3	0.82629	0.82608	0.999997	15600	0
RPS11	4	0.032353	0.079233	0.908103	1664	2	0.95315	0.95301	0.999997	18051	0
GIGYF1	4	0.032359	0.079251	0.908103	1665	3	0.94573	0.94548	0.999997	17900	0
GAS8	4	0.032383	0.079296	0.908103	1666	2	0.4239	0.43362	0.999997	8222	1
TIMM9	4	0.032387	0.079304	0.908103	1667	3	0.94943	0.94923	0.999997	17978	0
PRDM15	4	0.032399	0.079328	0.908103	1668	3	0.94803	0.94782	0.999997	17940	0
KCND3	4	0.032434	0.079406	0.908103	1669	2	0.21066	0.27457	0.9999	5247	1
LRTM1	4	0.032456	0.079458	0.908103	1670	2	0.62099	0.62081	0.999997	11746	0
LRRC37A	4	0.032467	0.079482	0.908103	1671	2	0.46303	0.46732	0.999997	8841	1
ZNF644	4	0.032485	0.079522	0.908103	1672	2	0.40757	0.42006	0.999997	7964	1
RASL12	4	0.032487	0.079527	0.908103	1673	2	0.045689	0.088189	0.973615	1723	2
SMNDC1	4	0.03255	0.079653	0.908103	1674	2	0.69505	0.6947	0.999997	13136	0
COX15	4	0.03257	0.0797	0.908103	1675	2	0.93352	0.93341	0.999997	17672	0
RAPGEF1	4	0.032581	0.079719	0.908103	1676	3	0.95201	0.95184	0.999997	18033	0
GPX4	4	0.032587	0.079728	0.908103	1677	3	0.98415	0.98425	0.999997	18675	0
OGDH	4	0.032612	0.079782	0.908103	1678	3	0.73461	0.73442	0.999997	13855	0
PDCD7	4	0.032684	0.079934	0.908103	1679	2	0.86251	0.86225	0.999997	16285	0
TRNAU1AP	4	0.032689	0.079953	0.908103	1680	1	0.0017001	0.0054915	0.860372	122	2
PARD6B	4	0.032695	0.079961	0.908103	1681	2	0.80588	0.80584	0.999997	15200	0
TRIM42	4	0.032705	0.079981	0.908103	1682	2	0.58861	0.58837	0.999997	11136	0
POLR3GL	4	0.032707	0.079986	0.908103	1683	3	0.77847	0.77843	0.999997	14671	0
SHC4	4	0.03274	0.080055	0.908103	1684	2	0.85835	0.85811	0.999997	16219	0
CLVS2	4	0.032791	0.080161	0.908103	1685	1	0.51317	0.5137	0.999997	9724	1
CLIP1	4	0.032861	0.080319	0.908103	1686	2	0.41481	0.42604	0.999997	8072	1
IKBKAP	4	0.032888	0.080381	0.908103	1687	3	0.89964	0.89922	0.999997	17020	0
PPP6R3	4	0.032893	0.080389	0.908103	1688	1	0.82236	0.82221	0.999997	15517	0
MEFV	4	0.032976	0.080565	0.908103	1689	2	0.85832	0.85809	0.999997	16218	0
NSUN4	4	0.032995	0.080596	0.908103	1690	2	0.22894	0.28682	0.999997	5473	1
ANP32E	4	0.033006	0.080624	0.908103	1691	3	0.60975	0.60954	0.999997	11539	0
RPL30	4	0.033029	0.080671	0.908103	1692	3	0.27921	0.32164	0.999997	6127	1
DCTN1	4	0.03304	0.08069	0.908103	1693	3	0.97288	0.97283	0.999997	18430	0
LOC101929372	4	0.033046	0.080703	0.908103	1694	1	0.26002	0.30816	0.999997	5878	1
TMEM43	4	0.033101	0.080824	0.908103	1695	2	0.91567	0.91531	0.999997	17325	0
ARHGEF3	4	0.033112	0.080849	0.908103	1696	2	0.067379	0.11983	0.985694	2323	2
2018-03-02	4	0.03312	0.08087	0.908103	1697	3	0.40189	0.41536	0.999997	7874	1
TRIM37	4	0.033122	0.080874	0.908103	1698	2	0.98947	0.9895	0.999997	18803	0
POLA1	4	0.033148	0.080924	0.908103	1699	1	0.0017518	0.0056148	0.861422	124	2
GRIN3B	4	0.033194	0.081027	0.908103	1700	3	0.99408	0.99411	0.999997	18929	0
HDAC7	4	0.033199	0.081038	0.908103	1701	1	0.34882	0.37323	0.999997	7058	1
ABCC6	4	0.033199	0.081038	0.908103	1702	3	0.88734	0.88689	0.999997	16771	0
CRACR2B	4	0.033211	0.081062	0.908103	1703	3	0.99446	0.9945	0.999997	18943	0
PRR11	4	0.033222	0.081084	0.908103	1704	3	0.9631	0.96297	0.999997	18242	0
MTPAP	4	0.03325	0.081143	0.908103	1705	2	0.91452	0.91415	0.999997	17301	0
PAWR	4	0.033301	0.081258	0.908103	1706	1	0.51842	0.51876	0.999997	9826	1
LSM7	4	0.033307	0.081267	0.908103	1707	3	0.96768	0.96755	0.999997	18327	0
PRSS35	4	0.033331	0.081322	0.908103	1708	2	0.14247	0.22707	0.996358	4337	1
SRRM2	4	0.033393	0.081453	0.908103	1709	3	0.43061	0.43928	0.999997	8318	1
SMC6	4	0.033403	0.081477	0.908103	1710	2	0.89504	0.89462	0.999997	16919	0
CHTF8	4	0.033461	0.081612	0.908103	1711	3	0.93895	0.93878	0.999997	17780	0
ENO1	4	0.033478	0.081645	0.908103	1712	3	0.9086	0.90816	0.999997	17197	0
ZMYM1	4	0.033505	0.081694	0.908103	1713	1	0.10241	0.17008	0.994071	3260	2
HMX1	4	0.033535	0.081758	0.908103	1714	3	0.80017	0.80013	0.999997	15080	0
THOC5	4	0.033556	0.081795	0.908103	1715	2	0.79464	0.79468	0.999997	14960	0
AVIL	4	0.033564	0.081815	0.908103	1716	3	0.96188	0.9617	0.999997	18218	0
CXCL5	4	0.033594	0.081879	0.908103	1717	2	0.70477	0.70449	0.999997	13305	0
PWP1	4	0.033607	0.081907	0.908103	1718	1	0.78899	0.78898	0.999997	14866	0
AKIRIN2	4	0.033621	0.081943	0.908103	1719	3	0.34433	0.36974	0.999997	6994	1
ARSI	4	0.033638	0.081972	0.908103	1720	3	0.21708	0.27888	0.999997	5325	1
USP5	4	0.033658	0.08202	0.908103	1721	1	0.6782	0.67789	0.999997	12803	0
LYRM4	4	0.033709	0.082117	0.908103	1722	2	0.50599	0.50679	0.999997	9592	1
EZH2	4	0.03376	0.082222	0.908103	1723	2	0.61422	0.614	0.999997	11628	0
COL21A1	4	0.033811	0.082339	0.908103	1724	1	0.31668	0.34887	0.999997	6629	1
PCDHGB5	4	0.033862	0.082454	0.908103	1725	2	0.71785	0.71779	0.999997	13554	0
NTN1	4	0.033878	0.082483	0.908103	1726	2	0.65887	0.65858	0.999997	12436	0
POP1	4	0.033885	0.082494	0.908103	1727	3	0.98964	0.98968	0.999997	18808	0
FAM53C	4	0.0339	0.082521	0.908103	1728	2	0.52609	0.52609	0.999997	9972	1
CACNG1	4	0.033913	0.082557	0.908103	1729	3	0.98433	0.98443	0.999997	18685	0
CTU1	4	0.03392	0.082569	0.908103	1730	3	0.86415	0.86387	0.999997	16314	0
OR1L4	4	0.033964	0.082672	0.908103	1731	2	0.92607	0.92583	0.999997	17497	0
PHF5A	4	0.034	0.082756	0.908103	1732	3	0.97959	0.9796	0.999997	18564	0
ZBTB16	4	0.034037	0.08283	0.908103	1733	2	0.98597	0.98606	0.999997	18728	0
ACTBL2	4	0.034041	0.082839	0.908103	1734	3	0.45954	0.46425	0.999997	8781	1
OR6C70	4	0.034058	0.082876	0.908103	1735	2	0.030952	0.066345	0.964407	1308	1
CTNNBIP1	4	0.034111	0.082996	0.908103	1736	2	0.87176	0.87138	0.999997	16473	0
SLC30A5	4	0.034117	0.083005	0.908103	1737	1	0.051989	0.097303	0.974723	1906	2
LANCL2	4	0.034127	0.083023	0.908103	1738	3	0.92303	0.92278	0.999997	17445	0
PRR25	4	0.034168	0.083108	0.908103	1739	1	0.38054	0.39812	0.999997	7532	1
ZYX	4	0.034196	0.083169	0.908103	1740	2	0.34916	0.37352	0.999997	7062	1
TBCA	4	0.034197	0.083172	0.908103	1741	3	0.6222	0.62203	0.999997	11770	0
HNRNPLL	4	0.03427	0.083337	0.908103	1742	1	0.076631	0.1332	0.987051	2570	1
SNAPC3	4	0.034281	0.08336	0.908103	1743	2	0.6815	0.6812	0.999997	12873	0
RHOQ	4	0.034291	0.083385	0.908103	1744	2	0.54168	0.54129	0.999997	10259	1
SCFD2	4	0.034321	0.08345	0.908103	1745	1	0.8863	0.88585	0.999997	16742	0
PUS1	4	0.034336	0.08348	0.908103	1746	3	0.80985	0.80982	0.999997	15281	0
NEURL3	4	0.034376	0.083567	0.908103	1747	3	0.93352	0.93341	0.999997	17630	0
STX16	4	0.034419	0.08367	0.908103	1748	2	0.045537	0.087951	0.973615	1719	1
RITA1	4	0.034423	0.083679	0.908103	1749	1	0.13219	0.21245	0.996358	4065	2
OR2W3	4	0.034474	0.083792	0.908103	1750	1	0.43195	0.44039	0.999997	8335	1
PLA2G10	4	0.034499	0.083851	0.908103	1751	3	0.98794	0.98802	0.999997	18769	0
PCDHGA5	4	0.034525	0.083905	0.908103	1752	1	0.72396	0.72386	0.999997	13660	0
FEM1B	4	0.034576	0.083997	0.908103	1753	1	0.50014	0.50122	0.999997	9487	1
SLC37A4	4	0.034627	0.084093	0.908103	1754	3	0.47578	0.47884	0.999997	9057	1
MRPS28	4	0.034627	0.084093	0.908103	1755	1	0.8978	0.89738	0.999997	16978	0
TOX4	4	0.034631	0.084104	0.908103	1756	2	0.52285	0.52296	0.999997	9913	1
PCDHB2	4	0.034642	0.08413	0.908103	1757	3	0.44512	0.45169	0.999997	8547	1
URB1	4	0.034662	0.084175	0.908103	1758	3	0.91352	0.91316	0.999997	17285	0
DHPS	4	0.034678	0.084205	0.908103	1759	3	0.85779	0.85757	0.999997	16207	0
EMC2	4	0.034702	0.084252	0.908103	1760	3	0.94998	0.9498	0.999997	17992	0
PKP3	4	0.03478	0.084397	0.908103	1761	1	0.28711	0.32738	0.999997	6231	1
ALPP	4	0.034784	0.084405	0.908103	1762	3	0.33421	0.36202	0.999997	6857	1
DDX52	4	0.03479	0.084423	0.908103	1763	3	0.55602	0.55567	0.999997	10533	0
TMSB10	4	0.034791	0.084427	0.908103	1764	2	0.78984	0.78986	0.999997	14879	0
STX5	4	0.034856	0.084578	0.908103	1765	2	0.15319	0.23722	0.997004	4543	1
ZNF628	4	0.034878	0.084633	0.908103	1766	3	0.91194	0.91156	0.999997	17256	0
CBX4	4	0.034898	0.084682	0.908103	1767	2	0.97304	0.97299	0.999997	18437	0
HEPACAM	4	0.034919	0.084723	0.908103	1768	3	0.96257	0.96244	0.999997	18231	0
FCGR1B	4	0.034931	0.084748	0.908103	1769	3	0.89331	0.89288	0.999997	16882	0
CDAN1	4	0.035005	0.084901	0.908103	1770	2	0.74143	0.74117	0.999997	13980	0
GCNT2	4	0.035035	0.084953	0.908103	1771	2	0.52393	0.524	0.999997	9932	1
RABL2A	4	0.035086	0.085074	0.908103	1772	2	0.28406	0.3252	0.999997	6186	1
PKM	4	0.035101	0.085102	0.908103	1773	3	0.67357	0.6733	0.999997	12717	0
MATK	4	0.035136	0.085177	0.908103	1774	2	0.6881	0.68777	0.999997	12996	0
BRCC3	4	0.035142	0.085192	0.908103	1775	3	0.97577	0.97568	0.999997	18496	0
CEP72	4	0.035188	0.085285	0.908103	1776	2	0.35532	0.37824	0.999997	7154	1
EPHA5	4	0.035207	0.085327	0.908103	1777	3	0.43013	0.43888	0.999997	8309	1
MFSD10	4	0.035238	0.085403	0.908103	1778	1	0.0028488	0.0084835	0.89884	173	1
C7orf33	4	0.03526	0.085438	0.908103	1779	3	0.35079	0.37476	0.999997	7085	1
PTTG1	4	0.035273	0.085467	0.908103	1780	3	0.87968	0.87923	0.999997	16623	0
POFUT2	4	0.035289	0.085504	0.908103	1781	2	0.7187	0.71864	0.999997	13571	0
C19orf48	4	0.035306	0.085539	0.908103	1782	2	0.82388	0.82371	0.999997	15548	0
RAC1	4	0.035319	0.08557	0.908103	1783	3	0.90183	0.90145	0.999997	17063	0
VWA3B	4	0.035325	0.085579	0.908103	1784	3	0.98944	0.98948	0.999997	18802	0
BHLHE40	4	0.035338	0.085608	0.908103	1785	2	0.7034	0.70314	0.999997	13285	0
WARS2	4	0.035349	0.085632	0.908103	1786	2	0.39161	0.407	0.999997	7708	1
CPPED1	4	0.035391	0.085733	0.908103	1787	1	0.60685	0.60665	0.999997	11480	0
CASC4	4	0.035402	0.085754	0.908103	1788	2	0.39485	0.40961	0.999997	7761	1
UBE2I	4	0.035413	0.085777	0.908103	1789	2	0.69677	0.69644	0.999997	13173	0
PEG3	4	0.035478	0.08591	0.908103	1790	3	0.97356	0.97352	0.999997	18449	0
TVP23B	4	0.035493	0.085939	0.908103	1791	1	0.43693	0.44457	0.999997	8416	1
SLU7	4	0.03551	0.08597	0.908103	1792	3	0.9927	0.9927	0.999997	18891	0
PTPRC	4	0.035542	0.086042	0.908103	1793	2	0.76173	0.76157	0.999997	14361	0
ATIC	4	0.035544	0.086044	0.908103	1794	2	0.87519	0.87482	0.999997	16534	0
RMDN3	4	0.035553	0.086062	0.908103	1795	2	0.76372	0.76356	0.999997	14401	0
NSF	4	0.035555	0.086065	0.908103	1796	3	0.99395	0.99399	0.999997	18924	0
IQSEC3	4	0.035595	0.086151	0.908103	1797	1	0.62974	0.62955	0.999997	11911	0
PRKDC	4	0.035596	0.086153	0.908103	1798	2	0.94785	0.94764	0.999997	17937	0
UBE2M	4	0.035615	0.086199	0.908103	1799	3	0.93352	0.93341	0.999997	17620	0
CDRT1	4	0.035618	0.086209	0.908103	1800	2	0.65313	0.65283	0.999997	12328	0
ATG16L1	4	0.035646	0.086275	0.908103	1801	1	0.016282	0.041626	0.927755	851	2
C6orf132	4	0.035694	0.086375	0.908103	1802	3	0.98614	0.98622	0.999997	18731	0
CCDC79	4	0.035697	0.086378	0.908103	1803	2	0.01033	0.027268	0.902628	567	2
IFI27L1	4	0.035716	0.08642	0.908103	1804	3	0.89482	0.89439	0.999997	16912	0
S1PR5	4	0.035745	0.086472	0.908103	1805	3	0.98791	0.98799	0.999997	18768	0
TEX13A	4	0.035748	0.086479	0.908103	1806	1	0.67137	0.6711	0.999997	12667	0
PLRG1	4	0.035793	0.086578	0.908103	1807	3	0.16001	0.24159	0.997004	4624	1
SLC37A2	4	0.035799	0.086589	0.908103	1808	1	0.061754	0.11162	0.983329	2168	2
P2RY8	4	0.035817	0.086627	0.908103	1809	3	0.15577	0.23887	0.997004	4577	1
TMEM8A	4	0.035823	0.086641	0.908103	1810	3	0.87841	0.87798	0.999997	16603	0
ADCK4	4	0.035829	0.086649	0.908103	1811	3	0.97944	0.97943	0.999997	18562	0
GTF2H3	4	0.035849	0.086692	0.908103	1812	2	0.74724	0.74708	0.999997	14092	0
ARL2	4	0.035852	0.0867	0.908103	1813	3	0.93975	0.93957	0.999997	17790	0
CELSR1	4	0.035866	0.086732	0.908103	1814	2	0.20079	0.26804	0.997942	5132	1
EFNA2	4	0.035888	0.086772	0.908103	1815	3	0.98238	0.98243	0.999997	18630	0
ATG2B	4	0.035888	0.086772	0.908103	1816	2	0.79572	0.79573	0.999997	14979	0
ZUFSP	4	0.0359	0.086801	0.908103	1817	3	0.040424	0.080292	0.973615	1573	1
KDR	4	0.0359	0.086802	0.908103	1818	2	0.82902	0.82876	0.999997	15651	0
JAKMIP3	4	0.035906	0.086813	0.908103	1819	3	0.91484	0.91447	0.999997	17307	0
FAM206A	4	0.03593	0.086869	0.908103	1820	3	0.25235	0.30285	0.999997	5769	1
TSPAN9	4	0.035942	0.086893	0.908103	1821	3	0.89632	0.89593	0.999997	16945	0
IFITM3	4	0.035951	0.086913	0.908103	1822	1	0.9544	0.95424	0.999997	18071	0
KMT2E	4	0.035953	0.086916	0.908103	1823	2	0.89898	0.89856	0.999997	17003	0
FIG4	4	0.03596	0.086931	0.908103	1824	3	0.98348	0.98355	0.999997	18652	0
NEU3	4	0.035975	0.086957	0.908103	1825	2	0.55417	0.55381	0.999997	10498	0
ZNF730	4	0.036002	0.087012	0.908103	1826	1	0.70657	0.70629	0.999997	13339	0
ZBTB8OS	4	0.036007	0.087021	0.908103	1827	3	0.26244	0.30982	0.999997	5914	1
SLC35A1	4	0.036053	0.087125	0.908103	1828	2	0.64706	0.64684	0.999997	12218	0
POLD2	4	0.036061	0.08714	0.908103	1829	3	0.52414	0.52419	0.999997	9935	1
SLC32A1	4	0.036104	0.087231	0.908103	1830	1	0.58799	0.58775	0.999997	11126	0
LOC101927572	4	0.036116	0.087258	0.908103	1831	2	0.4708	0.47424	0.999997	8982	1
CNTN5	4	0.036139	0.087308	0.908103	1832	3	0.36103	0.38263	0.999997	7244	1
HAUS7	4	0.036148	0.087329	0.908103	1833	2	0.66907	0.66876	0.999997	12623	0
CT47A6	4	0.036155	0.087343	0.908103	1834	2	0.71315	0.713	0.999997	13465	0
CCDC154	4	0.036199	0.087436	0.908103	1835	3	0.44488	0.4515	0.999997	8540	1
BBOX1	4	0.036206	0.08745	0.908103	1836	1	0.10253	0.17024	0.994071	3263	1
ZDHHC8	4	0.036229	0.087484	0.908103	1837	3	0.42365	0.43341	0.999997	8217	1
KRTAP4-6	4	0.036235	0.087496	0.908103	1838	2	0.77408	0.77406	0.999997	14603	0
KCNK15	4	0.036241	0.087514	0.908103	1839	3	0.74198	0.74171	0.999997	13993	0
SNURF	4	0.036246	0.087522	0.908103	1840	2	0.065888	0.11766	0.984056	2285	1
POLG	4	0.036257	0.087548	0.908103	1841	1	0.090742	0.15339	0.988199	2959	2
ZNF785	4	0.036265	0.087563	0.908103	1842	3	0.79143	0.79146	0.999997	14906	0
NAA20	4	0.036283	0.087597	0.908103	1843	3	0.94708	0.94686	0.999997	17924	0
CATSPERG	4	0.036308	0.087647	0.908103	1844	3	0.9859	0.98599	0.999997	18724	0
LMOD2	4	0.036311	0.087656	0.908103	1845	2	0.94021	0.94004	0.999997	17805	0
FGFBP2	4	0.036398	0.087848	0.908544	1846	2	0.74253	0.74228	0.999997	14000	0
TMEM208	4	0.036409	0.087874	0.908544	1847	2	0.85778	0.85756	0.999997	16206	0
WIPI2	4	0.036409	0.087875	0.908544	1848	2	0.25609	0.3054	0.999997	5825	1
MRPL50	4	0.036439	0.08794	0.908544	1849	3	0.87078	0.87043	0.999997	16459	0
NAPA	4	0.03646	0.087978	0.908544	1850	2	0.91151	0.91113	0.999997	17247	0
CBWD1	4	0.036481	0.088026	0.908544	1851	3	0.99298	0.99301	0.999997	18897	0
BCOR	4	0.036511	0.088089	0.908544	1852	3	0.79582	0.79581	0.999997	14981	0
KRTAP5-11	4	0.036511	0.088089	0.908544	1853	2	0.39825	0.41239	0.999997	7815	1
TP53	4	0.036529	0.088126	0.908544	1854	2	0.71718	0.7171	0.999997	13542	0
WIZ	4	0.036562	0.088195	0.908764	1855	1	0.689	0.68867	0.999997	13013	0
RPA1	4	0.036606	0.088294	0.909017	1856	2	0.097402	0.16286	0.988199	3145	1
XCR1	4	0.036613	0.088315	0.909017	1857	2	0.9455	0.94524	0.999997	17894	0
MRPL37	4	0.036668	0.088421	0.909625	1858	3	0.97917	0.97914	0.999997	18556	0
FST	4	0.036715	0.088518	0.909709	1859	1	0.72773	0.72762	0.999997	13733	0
C1QTNF6	4	0.036766	0.088632	0.909709	1860	2	0.27761	0.32049	0.999997	6101	1
COL4A1	4	0.03677	0.088639	0.909709	1861	2	0.98368	0.98376	0.999997	18660	0
LRRC42	4	0.036781	0.088662	0.909709	1862	2	0.14308	0.22792	0.996358	4360	1
PRDX2	4	0.036783	0.088667	0.909709	1863	3	0.95581	0.95561	0.999997	18103	0
TLR8	4	0.036816	0.088736	0.909922	1864	2	0.78601	0.78602	0.999997	14806	0
CFAP97	4	0.036867	0.088842	0.910268	1865	1	0.15314	0.23719	0.997004	4542	1
CHPF	4	0.03688	0.088865	0.910268	1866	3	0.023829	0.055611	0.952239	1112	1
ZBTB49	4	0.036952	0.089026	0.910888	1867	3	0.95747	0.95728	0.999997	18132	0
F13B	4	0.036967	0.089056	0.910888	1868	3	0.64125	0.64101	0.999997	12118	0
NDUFAF7	4	0.036989	0.089108	0.910888	1869	2	0.96435	0.96422	0.999997	18265	0
SLC25A23	4	0.036995	0.089121	0.910888	1870	3	0.94131	0.94112	0.999997	17822	0
LRRC10B	4	0.03702	0.089164	0.910888	1871	1	0.83136	0.83109	0.999997	15694	0
SMG8	4	0.037122	0.089384	0.912649	1872	1	0.84217	0.84186	0.999997	15907	0
ATCAY	4	0.037142	0.089431	0.912649	1873	2	0.81457	0.81451	0.999997	15373	0
RBM34	4	0.037164	0.089484	0.912695	1874	2	0.088989	0.15088	0.988199	2903	1
GPR101	4	0.037226	0.089622	0.912747	1875	3	0.84254	0.84221	0.999997	15916	0
POLR3B	4	0.03723	0.089629	0.912747	1876	3	0.24186	0.29564	0.999997	5632	1
CRLF1	4	0.037241	0.08965	0.912747	1877	3	0.87899	0.87857	0.999997	16610	0
MRPL40	4	0.037274	0.089722	0.912747	1878	1	0.02172	0.052418	0.943174	1062	1
HIST2H4A	4	0.037305	0.089808	0.912747	1879	3	0.99181	0.99183	0.999997	18862	0
OR6A2	4	0.037324	0.089851	0.912747	1880	3	0.15775	0.24014	0.997004	4600	1
LIPH	4	0.037325	0.089853	0.912747	1881	1	0.066534	0.11859	0.984455	2301	2
SPICE1	4	0.037362	0.08994	0.912747	1882	2	0.84814	0.84784	0.999997	16027	0
ARHGEF4	4	0.037376	0.089969	0.912747	1883	1	0.059408	0.10821	0.982247	2102	1
EPHA8	4	0.037427	0.09007	0.912747	1884	1	0.37593	0.39437	0.999997	7462	1
MT1M	4	0.037446	0.090115	0.912747	1885	3	0.80291	0.80284	0.999997	15132	0
PSMA5	4	0.037464	0.090164	0.912747	1886	3	0.9946	0.99465	0.999997	18947	0
CCDC103	4	0.037489	0.090218	0.912747	1887	3	0.86237	0.86211	0.999997	16283	0
NFATC4	4	0.037495	0.090229	0.912747	1888	2	0.86826	0.86796	0.999997	16406	0
PDE6A	4	0.037513	0.090261	0.912747	1889	3	0.79435	0.79438	0.999997	14953	0
MTHFD1	4	0.037519	0.090279	0.912747	1890	3	0.98444	0.98454	0.999997	18687	0
SLCO4A1	4	0.037529	0.090301	0.912747	1891	1	0.34924	0.37358	0.999997	7064	1
ZNRD1	4	0.037556	0.090363	0.912898	1892	3	0.44273	0.44958	0.999997	8506	1
PSD2	4	0.037599	0.09045	0.913289	1893	3	0.99285	0.99287	0.999997	18892	0
RNF146	4	0.037638	0.090544	0.913704	1894	2	0.55628	0.55594	0.999997	10538	0
PVRL1	4	0.037681	0.090649	0.913704	1895	2	0.96778	0.96764	0.999997	18329	0
PFDN6	4	0.037691	0.090669	0.913704	1896	3	0.94419	0.94395	0.999997	17867	0
DDOST	4	0.037716	0.090733	0.913704	1897	3	0.95954	0.95935	0.999997	18172	0
OR2L2	4	0.037722	0.090751	0.913704	1898	3	0.25584	0.30524	0.999997	5820	1
CD8A	4	0.037732	0.090778	0.913704	1899	1	0.65116	0.65088	0.999997	12294	0
ICA1	4	0.037777	0.090877	0.913836	1900	3	0.93352	0.93341	0.999997	17634	0
TCEB3C	4	0.037782	0.090886	0.913836	1901	2	0.87747	0.87702	0.999997	16581	0
GABRG2	4	0.037834	0.090989	0.913945	1902	1	0.030042	0.064922	0.964407	1282	2
CXorf56	4	0.037839	0.090999	0.913945	1903	3	0.9162	0.91587	0.999997	17332	0
FBN3	4	0.037869	0.091065	0.913945	1904	3	0.71935	0.71929	0.999997	13584	0
LAMTOR1	4	0.037884	0.091098	0.913945	1905	2	0.63818	0.63799	0.999997	12060	0
FSCN2	4	0.037925	0.091186	0.913945	1906	3	0.6084	0.6082	0.999997	11505	0
YAP1	4	0.037935	0.091207	0.913945	1907	1	0.92068	0.92036	0.999997	17411	0
FNDC5	4	0.037949	0.091232	0.913945	1908	3	0.86111	0.86086	0.999997	16264	0
C16orf62	4	0.037986	0.091318	0.914149	1909	2	0.97454	0.97449	0.999997	18473	0
CEACAM8	4	0.037999	0.091348	0.914149	1910	3	0.94923	0.94902	0.999997	17972	0
KLF14	4	0.038037	0.091434	0.914536	1911	3	0.97379	0.97376	0.999997	18455	0
IPO8	4	0.038061	0.091484	0.91455	1912	3	0.91222	0.91186	0.999997	17263	0
ENY2	4	0.038088	0.091542	0.91456	1913	1	0.17718	0.25266	0.997942	4833	1
AIDA	4	0.038148	0.091654	0.91456	1914	2	0.45895	0.46372	0.999997	8766	1
OR2A7	4	0.038159	0.091679	0.91456	1915	3	0.98701	0.98709	0.999997	18751	0
OR56A1	4	0.038181	0.091727	0.91456	1916	3	0.96646	0.96634	0.999997	18310	0
EVC2	4	0.038215	0.091796	0.91456	1917	2	0.89083	0.89042	0.999997	16846	0
HCN4	4	0.038237	0.091836	0.91456	1918	2	0.3506	0.37462	0.999997	7081	1
PPIE	4	0.03824	0.091845	0.91456	1919	2	0.29104	0.33027	0.999997	6289	1
NT5C1B-RDH14	4	0.038291	0.091951	0.91456	1920	2	0.74606	0.74585	0.999997	14074	0
ARID1A	4	0.038315	0.092003	0.91456	1921	2	0.85098	0.85074	0.999997	16082	0
ITGB1BP1	4	0.038342	0.092061	0.91456	1922	1	0.00166	0.0053949	0.860372	119	3
PANX2	4	0.038389	0.092145	0.91456	1923	3	0.49156	0.49321	0.999997	9331	1
LRRC15	4	0.038393	0.092153	0.91456	1924	1	0.10883	0.17921	0.994071	3438	2
REM2	4	0.038426	0.092219	0.91456	1925	2	0.16069	0.24204	0.997004	4629	1
CCDC81	4	0.038482	0.092335	0.91456	1926	3	0.51621	0.51662	0.999997	9780	1
SLC25A2	4	0.038494	0.092364	0.91456	1927	1	0.60034	0.60011	0.999997	11345	0
HPD	4	0.038538	0.092451	0.91456	1928	3	0.86001	0.85976	0.999997	16245	0
SBK1	4	0.038545	0.092476	0.91456	1929	2	0.97734	0.97721	0.999997	18523	0
FAM120B	4	0.03856	0.092508	0.91456	1930	2	0.49942	0.50055	0.999997	9472	1
KIF11	4	0.038571	0.092526	0.91456	1931	2	0.91232	0.91196	0.999997	17267	0
RPL5	4	0.038594	0.092573	0.91456	1932	3	0.97207	0.972	0.999997	18411	0
CTSZ	4	0.038596	0.092575	0.91456	1933	2	0.7853	0.78532	0.999997	14789	0
GOLGA8N	4	0.038605	0.092595	0.91456	1934	3	0.83373	0.83343	0.999997	15732	0
CCDC146	4	0.038647	0.092675	0.91456	1935	2	0.26598	0.31229	0.999997	5950	1
METTL3	4	0.038663	0.092714	0.91456	1936	3	0.99504	0.99508	0.999997	18962	0
KAT7	4	0.038672	0.092738	0.91456	1937	2	0.93352	0.93341	0.999997	17657	0
ARPC4-TTLL3	4	0.038698	0.092787	0.91456	1938	2	0.68712	0.68681	0.999997	12973	0
PHYKPL	4	0.038748	0.09289	0.91456	1939	2	0.65133	0.65103	0.999997	12297	0
U2AF1	4	0.03875	0.092896	0.91456	1940	3	0.99192	0.99192	0.999997	18869	0
SLC12A1	4	0.038756	0.092912	0.91456	1941	3	0.88927	0.88886	0.999997	16812	0
APBA3	4	0.038795	0.092995	0.91456	1942	2	0.28987	0.3294	0.999997	6273	1
LOC100130370	4	0.038806	0.093018	0.91456	1943	3	0.99519	0.99522	0.999997	18966	0
NDUFV2	4	0.03885	0.093116	0.91456	1944	1	0.38677	0.40301	0.999997	7631	1
PTAFR	4	0.038851	0.093119	0.91456	1945	2	0.29015	0.3296	0.999997	6278	1
TIMM44	4	0.038862	0.093142	0.91456	1946	2	0.73628	0.73611	0.999997	13885	0
PAFAH1B2	4	0.038875	0.093159	0.91456	1947	3	0.93352	0.93341	0.999997	17637	0
ORC2	4	0.038901	0.093217	0.91466	1948	2	0.69434	0.69397	0.999997	13125	0
SREBF2	4	0.03893	0.093281	0.914775	1949	2	0.48935	0.49115	0.999997	9288	1
ABHD1	4	0.038952	0.09333	0.914775	1950	2	0.67219	0.67191	0.999997	12688	0
CEBPZ	4	0.038982	0.093408	0.914775	1951	3	0.98315	0.98322	0.999997	18642	0
DBR1	4	0.039019	0.093499	0.914775	1952	2	0.72999	0.72985	0.999997	13770	0
JADE1	4	0.039053	0.09357	0.914775	1953	2	0.78063	0.78066	0.999997	14708	0
HIC1	4	0.039053	0.09357	0.914775	1954	1	0.078748	0.1363	0.987051	2637	1
DCANP1	4	0.039098	0.093668	0.914775	1955	2	0.87903	0.8786	0.999997	16611	0
RNASE12	4	0.039104	0.093675	0.914775	1956	2	0.2428	0.29629	0.999997	5644	1
NGLY1	4	0.039214	0.093887	0.914775	1957	3	0.99067	0.9907	0.999997	18827	0
XYLT1	4	0.039244	0.09395	0.914775	1958	2	0.079929	0.13796	0.987202	2667	1
PC	4	0.039256	0.093978	0.914775	1959	1	0.69918	0.69889	0.999997	13203	0
VAV3	4	0.039307	0.094091	0.914775	1960	2	0.013149	0.034192	0.912393	715	2
TAF7	4	0.039308	0.094093	0.914775	1961	3	0.83036	0.83009	0.999997	15683	0
RAD23B	4	0.039323	0.094124	0.914775	1962	2	0.2329	0.28954	0.999997	5526	1
SGSM2	4	0.039334	0.094148	0.914775	1963	2	0.95555	0.95536	0.999997	18101	0
PBRM1	4	0.039409	0.094319	0.914775	1964	1	0.45298	0.45849	0.999997	8670	1
PHB	4	0.039428	0.094364	0.914775	1965	3	0.98703	0.98711	0.999997	18753	0
MAST1	4	0.039435	0.094375	0.914775	1966	3	0.9938	0.99383	0.999997	18917	0
PPP1R1C	4	0.039447	0.094408	0.914775	1967	2	0.97907	0.97904	0.999997	18552	0
KPNA5	4	0.039453	0.09442	0.914775	1968	3	0.15826	0.24046	0.997004	4604	1
PIK3C3	4	0.039458	0.094431	0.914775	1969	2	0.97301	0.97296	0.999997	18434	0
DARS	4	0.039469	0.094452	0.914775	1970	2	0.89475	0.89432	0.999997	16908	0
TCF7	4	0.039472	0.094458	0.914775	1971	3	0.94854	0.94834	0.999997	17951	0
ASGR2	4	0.03951	0.094531	0.914775	1972	2	0.11255	0.1845	0.994438	3543	2
MYBL2	4	0.039561	0.094634	0.914775	1973	2	0.26941	0.31467	0.999997	5998	1
TUBB8	4	0.039561	0.094634	0.914775	1974	3	0.86235	0.8621	0.999997	16282	0
RAD51D	4	0.039574	0.094661	0.914775	1975	3	0.71189	0.7117	0.999997	13439	0
GOLGA8R	4	0.039612	0.094728	0.914775	1976	2	0.96639	0.96627	0.999997	18308	0
INIP	4	0.039639	0.094782	0.914775	1977	2	0.7988	0.7988	0.999997	15050	0
TUBA3D	4	0.039662	0.094833	0.914775	1978	2	0.42303	0.43291	0.999997	8204	1
TSSC4	4	0.039726	0.094961	0.914775	1979	3	0.88206	0.88166	0.999997	16662	0
WWP2	4	0.039745	0.095001	0.914775	1980	3	0.97869	0.97863	0.999997	18545	0
CLCF1	4	0.039764	0.095041	0.914775	1981	1	0.48322	0.48558	0.999997	9173	1
TRAF2	4	0.039797	0.095122	0.914775	1982	2	0.45102	0.45676	0.999997	8636	1
CACNB4	4	0.039802	0.09513	0.914775	1983	3	0.65311	0.65281	0.999997	12327	0
EIF1	4	0.039815	0.095161	0.914775	1984	1	0.57291	0.57271	0.999997	10847	0
ASMTL	4	0.039821	0.095176	0.914775	1985	3	0.78183	0.78187	0.999997	14730	0
RHOA	4	0.039853	0.095237	0.914775	1986	3	0.80351	0.80346	0.999997	15147	0
CCNB1	4	0.039865	0.095266	0.914775	1987	3	0.96285	0.96273	0.999997	18238	0
SLC9A2	4	0.039865	0.095266	0.914775	1988	1	0.47181	0.47513	0.999997	8999	1
PPIAL4D	4	0.039899	0.095341	0.914775	1989	2	0.83514	0.83484	0.999997	15762	0
MFSD2A	4	0.03991	0.095366	0.914775	1990	2	0.91027	0.90989	0.999997	17227	0
EXPH5	4	0.039916	0.095372	0.914775	1991	1	0.61561	0.61538	0.999997	11654	0
ZNF512B	4	0.039929	0.095401	0.914775	1992	3	0.74986	0.74972	0.999997	14143	0
MTCH2	4	0.039942	0.095428	0.914775	1993	3	0.81382	0.81376	0.999997	15363	0
CELF5	4	0.039967	0.095478	0.914775	1994	1	0.65746	0.65716	0.999997	12410	0
POLR2J	4	0.039967	0.095478	0.914775	1995	3	0.64176	0.64149	0.999997	12130	0
ZNF653	4	0.040031	0.095615	0.915537	1996	3	0.90647	0.90599	0.999997	17154	0
ARHGAP22	4	0.040068	0.0957	0.915537	1997	1	0.91977	0.91943	0.999997	17393	0
PUF60	4	0.040069	0.095702	0.915537	1998	2	0.66983	0.66953	0.999997	12638	0
LHCGR	4	0.040152	0.095881	0.9164	1999	3	0.90356	0.90311	0.999997	17097	0
[truncated: 17,115 more rows]
